# Supplementary material for: Evaluating follow-up and complexity in cancer clinical trials (EFACCT): an eDelphi study of research professionals’ perspectives
Source: PubMed Central journal article supplement — BMJ Open. 2020 Feb 18;10(2):e034269. doi: 10.1136/bmjopen-2019-034269 (PMC7045255; doi:10.1136/bmjopen-2019-034269), 2020-02-18
Supplement: bmjopen-2019-034269.draft_revisions.pdf [file bmjopen-2019-034269.draft_revisions.pdf]

# BMJ Open

BMJ Open is committed to open peer review. As part of this commitment we make the peer review history of every article we publish publicly available.

When an article is published we post the peer reviewers' comments and the authors' responses online. We also post the versions of the paper that were used during peer review. These are the versions that the peer review comments apply to.

The versions of the paper that follow are the versions that were submitted during the peer review process. They are not the versions of record or the final published versions. They should not be cited or distributed as the published version of this manuscript.

BMJ Open is an open access journal and the full, final, typeset and author-corrected version of record of the manuscript is available on our site with no access controls, subscription charges or pay-per-view fees (<http://bmjopen.bmj.com>).

If you have any questions on BMJ Open's open peer review process please email [info.bmjopen@bmj.com](mailto:info.bmjopen@bmj.com)

# BMJ Open

## Evaluating Follow-up and Complexity in Cancer Clinical Trials (EFACCT): An e-Delphi study of research professionals' perspectives

|                               |                                                                                                                                                                                                                                                                                                                                                                                                                                                                                                                                                                    |
|-------------------------------|--------------------------------------------------------------------------------------------------------------------------------------------------------------------------------------------------------------------------------------------------------------------------------------------------------------------------------------------------------------------------------------------------------------------------------------------------------------------------------------------------------------------------------------------------------------------|
| Journal:                      | <i>BMJ Open</i>                                                                                                                                                                                                                                                                                                                                                                                                                                                                                                                                                    |
| Manuscript ID                 | bmjopen-2019-034269                                                                                                                                                                                                                                                                                                                                                                                                                                                                                                                                                |
| Article Type:                 | Original research                                                                                                                                                                                                                                                                                                                                                                                                                                                                                                                                                  |
| Date Submitted by the Author: | 16-Sep-2019                                                                                                                                                                                                                                                                                                                                                                                                                                                                                                                                                        |
| Complete List of Authors:     | Jones, Helene; University of Lincoln, Lincoln Institute for Health; United Lincolnshire Hospitals NHS Trust, Lincolnshire Clinical Research Facility<br>Curtis, Ffion; University of Lincoln, Lincoln Institute for Health<br>Law, Graham; University of Lincoln, Community Health Research Unit<br>Bridle, Christopher; University of Bedfordshire, School of Psychology<br>Boyle, Dorothy; NHS Lothian, South East Scottish Cancer Research Network (SESCRN)<br>Ahmed, Tanweer; United Lincolnshire Hospitals NHS Trust, Lincolnshire Clinical Research Facility |
| Keywords:                     | Cancer research, follow-up, Delphi methods, protocol complexity, workforce planning, Singerian Inquiry                                                                                                                                                                                                                                                                                                                                                                                                                                                             |
|                               |                                                                                                                                                                                                                                                                                                                                                                                                                                                                                                                                                                    |

SCHOLARONE™  
Manuscripts

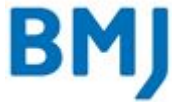

I, the Submitting Author has the right to grant and does grant on behalf of all authors of the Work (as defined in the below author licence), an exclusive licence and/or a non-exclusive licence for contributions from authors who are: i) UK Crown employees; ii) where BMJ has agreed a CC-BY licence shall apply, and/or iii) in accordance with the terms applicable for US Federal Government officers or employees acting as part of their official duties; on a worldwide, perpetual, irrevocable, royalty-free basis to BMJ Publishing Group Ltd ("BMJ") its licensees and where the relevant Journal is co-owned by BMJ to the co-owners of the Journal, to publish the Work in this journal and any other BMJ products and to exploit all rights, as set out in our [licence](#).

The Submitting Author accepts and understands that any supply made under these terms is made by BMJ to the Submitting Author unless you are acting as an employee on behalf of your employer or a postgraduate student of an affiliated institution which is paying any applicable article publishing charge ("APC") for Open Access articles. Where the Submitting Author wishes to make the Work available on an Open Access basis (and intends to pay the relevant APC), the terms of reuse of such Open Access shall be governed by a Creative Commons licence – details of these licences and which [Creative Commons](#) licence will apply to this Work are set out in our licence referred to above.

Other than as permitted in any relevant BMJ Author's Self Archiving Policies, I confirm this Work has not been accepted for publication elsewhere, is not being considered for publication elsewhere and does not duplicate material already published. I confirm all authors consent to publication of this Work and authorise the granting of this licence.

# Evaluating Follow-Up and Complexity in Cancer Clinical Trials (EFACCT): An eDelphi study of research professionals' perspectives

Helene Markham Jones<sup>1,2\*</sup>, Dr. Ffion Curtis<sup>1</sup>, Prof. Graham Law<sup>3</sup>, Prof. Christopher Bridle<sup>4</sup>, Dorothy Boyle<sup>5</sup>, Prof. Tanweer Ahmed<sup>2</sup>.

<sup>1</sup> Lincoln Institute for Health, University of Lincoln, Lincoln, England, United Kingdom, <sup>2</sup> Lincolnshire Clinical Research Facility, United Lincolnshire Hospitals Trust, Lincoln, England, United Kingdom, <sup>3</sup> Community Health Research Unit, University of Lincoln, England, United Kingdom, <sup>4</sup> University of Bedfordshire, Luton, England, United Kingdom, <sup>5</sup> South East Scottish Cancer Research Network (SESCRN), Edinburgh, Scotland, United Kingdom.

\*Corresponding author: Helene Markham Jones

Lincoln Institute for Health, Bridge House, University of Lincoln, Brayford Pool, Lincoln, LN6 7TS

Email address: [hMarkhamJones@lincoln.ac.uk](mailto:hMarkhamJones@lincoln.ac.uk)

Tel: 07515 283991

Word count: 5643

# Evaluating Follow-Up and Complexity in Cancer Clinical Trials (EFACCT): An eDelphi study of research professionals' perspectives

Helene Jones<sup>1, 2</sup>, Ffion Curtis<sup>1</sup>, Graham Law<sup>3</sup>, Christopher Bridle<sup>4</sup>, Dorothy Boyle<sup>5</sup>, Tanweer Ahmed<sup>2</sup>

## ABSTRACT

**Objectives:** To evaluate cancer research delivery, follow-up and complexity using consensus methods to: 1) identify professional priorities 2) understand contextual challenges 3) define protocol acuity rating indicators to support the development of a Trial Rating And Complexity Assessment Tool: TRACAT.

**Design:** A classic eDelphi completed in three rounds.

**Setting:** Multicentre online survey involving professionals at NHS secondary care sites in Scotland and England varied in scale, geographical location and patient populations.

**Participants:** Principal Investigators at 13 hospitals across nine clinical research networks recruited 33 participants using pre-defined eligibility criteria to form a multi-disciplinary panel.

**Main Outcome Measures:** Statements achieving a consensus level of 70% on a seven-point Likert-type scale and ranked Trial Rating Indicators (TRIs) developed by research professionals.

**Results:** The panel developed 75 consensus statements illustrating factors contributing to complexity, follow-up intensity and operational efficiency in trial delivery, and specified 14 ranked Trial Rating Indicators (TRIs). Seven open questions in the first qualitative round generated 531 individual statements. Iterative surveys received response rates of 82%, 82% and 93%.

**Conclusions:** Clinical trials operate with in a dynamic, complex healthcare and innovation system where rapid scientific advances present opportunities and challenges for delivery organisations and professionals. Panellists highlighted cultural and organisational factors limiting the profession's potential to support growing trial complexity and follow-up. Enhanced communication, inter-operability, funding and capacity have emerged as key priorities. Future operational models should test dialectic Singerian-based approaches respecting open dialogue and shared values. Research capacity building should prioritise innovative, collaborative approaches embedding validated review and evaluation models to understand changing operational needs and challenges. TRACAT provides a mechanism for continual knowledge assimilation to improve decision-making.

## Strengths and limitations of this study

- This study developed consensus-defined trial rating and complexity indicators (TRIs) to support objective analysis of cancer research delivery adaptable to other therapeutic areas and global settings.
- Qualitative aspects provide in-depth contextual evidence through the 'voices' of patient-facing professionals, articulating human & social aspects of research.
- Our Delphi methodology adopted a Singerian approach which is holistic and dialectical.
- Participants were limited to research professionals delivering studies at NHS sites in Scotland and England. Future research is planned involving a wider demographic to include sponsors, funders, networks and policymakers.

**Keywords:** Cancer research, follow-up, Delphi methods, protocol complexity, workforce planning, Singerian Inquiry.

## INTRODUCTION

Clinical trial delivery in hospital settings is crucial in advancing cancer care and treatment options with evidence indicating sustained commitment to research enhances performance and patient outcomes.<sup>1</sup> Cancer research has evolved rapidly in recent years, with innovations in immunotherapy and precision medicine increasingly prioritised in healthcare policy. The NHS has published ambitions to accelerate innovation, outlining a framework for rapid adoption of next generation treatments offering personalised, stratified care and follow-up models.<sup>2-3</sup>

The ability to translate scientific advances into clinical and patient benefit is a critical requirement for healthcare providers, as cancer incidence and patient populations continue to grow.<sup>4</sup> Realising these translational benefits is challenging sites as cancer trial complexity increases,<sup>5</sup> with niche designs and stratified treatments affecting research delivery costs and resources. As trials evolve to study rare diseases, wide-ranging cancers and molecular sub-types, delivery complexity and workloads grow in tandem. Intricate protocols, narrow selection criteria, high data demands and extended safety, efficacy and outcome monitoring<sup>6-7</sup> are stretching staff and site capabilities.

1 A predicted 70% increase in cancer incidence<sup>8</sup> within 20  
2 years combined with improving survival rates, follow-up  
3 demands and funding pressures necessitates operational review  
4 of trial designs and implementation frameworks to articulate  
5 impacts on sites, patients and professionals. Systematic,  
6 structured evaluation of research delivery in secondary care  
7 settings is limited with minimal, current empirical study of trial  
8 acuity, follow-up impact, institutional dynamics or operational  
9 processes across complex healthcare institutions, such as the  
10 NHS. In-depth review is a paramount priority for the  
11 healthcare industry to comprehend variables contributing to  
12 service pressures, identify changing stakeholder needs and  
13 facilitate evidence-based commissioning of services through  
14 appropriately aligned funding and support models.

15 Delivering research in the era of precision medicine is  
16 intense and complex, a clinical reality strongly evidenced in  
17 international literature.<sup>9</sup> Analysis of operational delivery  
18 involving key delivery stakeholders has predominantly  
19 operated at regional levels, limiting global relevance and has  
20 not yet led to transformative models.<sup>10</sup> Lyddiard, J et al.<sup>11</sup>  
21 undertook a UK collaborative study to develop a workload  
22 measurement tool but excluded investigator and pharmacist  
23 roles, anticipating challenges in collating accurate workload  
24 data. Further research recommended qualitative evaluation of  
25 workload and complexity alongside development of trial rating  
26 models using experts whose advice is “fundamental to the  
27 weighting and scoring.”<sup>12</sup> However, within healthcare  
28 applications and systems development there is a persistent lack  
29 of dialogue with “users and implementers of technology for  
30 data capture.”<sup>13</sup> Operational evaluation including assessment  
31 of technologies, training solutions, capacity planning and  
32 research delivery models should involve subject-matter experts  
33 capable of providing grounded knowledge and insight. The  
34 significant complexity gap and incremental patient follow-up  
35 activity requires external recognition. Currently there is no  
36 national analysis of follow-up activity or protocol acuity to  
37 understand fluctuating operational and resource demands at  
38 local, regional and national levels. Systematic rating of trial  
39 attributes in real time and over study lifetimes will create  
40 longitudinal data sets enabling evidence-based cost attribution  
41 and funding decisions to enhance research capacity and  
42 productivity. The extant literature underlines a need for broad,  
43 cyclical and continual analysis of research advancements and  
44 disease burdens to anticipate future demands for resources, as  
45 well as facilitating sustainable growth, productivity and  
46 improvements in patient care.

47 Enabling research growth necessitates structured  
48 workforce planning yet there is poor application of this crucial  
49 management function across the NHS.<sup>14</sup> To build capacity,  
50 manage increasingly complex trials and support patient-  
51 centred care, research organisations, funders and policy  
52 makers need to evaluate current delivery and performance  
53 management models, seek interdisciplinary stakeholder  
54 feedback and consider adopting creative, design-thinking

55 approaches with reflective and critical capabilities.<sup>15</sup> Research  
56 into Singerian organisational models has shown that holistic  
57 and dialectic approaches to understanding context-related  
58 challenges supports process improvement and knowledge  
59 generation. Organisations cultivating positive communication  
60 with well-integrated systems are associated with improved  
61 performance and healthcare outcomes.<sup>16</sup> Holistic, collaborative  
62 team environments promote valued attributes of respect,  
63 creativity and knowledge sharing.<sup>17</sup>

## AIMS

This study aimed to contribute to existing knowledge of cancer research delivery by engaging key stakeholders in a democratic, systemic evaluation. We sought multi-disciplinary perspectives to: 1) identify priorities 2) understand challenges in context 3) define trial rating indicators for inclusion in a Trial Rating And Complexity Assessment Tool: TRACAT. This study adopted a holistic, consensus-based design engaging patient-facing clinical trial professionals in developing grounded knowledge of trial implementation and end-user input into the development of an operational decision-support tool.

## METHODS

### Study design and approach

To facilitate a detailed systems evaluation sensitive to the multi-faceted nature of cancer research delivery a multimodal study was developed. The design reflects the Churchman-Singerian model of Inquiring systems valuing ethics and community knowledge in complexity evaluation and decision-making.<sup>18</sup> The adopted design combining the Delphi technique with a Singerian approach followed an initial scoping review covering subject, policy and methodological literature. The review identified key challenges for the profession directing the overall research and initial survey design. A democratic approach was needed recognising multiple perspectives combined with individual knowledge and experience, to form a comprehensive understanding of the complexities of the systems and networks in which they operate through a dialectical group consensus process, a Singerian Delphi.

### Delphi technique

The Delphi technique is widely used in healthcare to gain insight from frontline experts knowledgeable within specific fields.<sup>19</sup> It provides practical applications in consensus development, prioritisation, forecasting, policy development and investigation of multi-faceted issues.<sup>19-21</sup> We adopted the method to elicit expert opinion in developing a comprehensive rubric of research delivery variables and in the analysis of complex problems within a group.<sup>22</sup> The professionals recruited to the panel performed an ethical role, as their observations and engagement in identifying trial-rating attributes contribute to designing an evaluation tool for operational decision-making and strategic planning. The



design of technical applications or models for strategic evaluation or decision-support and inclusion criteria for measurement or quantitative judgements should be based upon input from ‘experts’ in the field (patients and professionals), the users and benefactors of ‘human-centred automation.’<sup>13,17,23</sup> For this reason, the research commences with a Delphi designed from a Singerian IS (Inquiring System) perspective, drawing ethics and heuristics into the development of an information system and model. This Singerian-orientated Delphi aimed to incorporate diverse knowledge, experience and ideologies of multiple stakeholders, disciplines and personality types<sup>24</sup> to form a prismatic view of cancer research delivery sensitive to its evolving, multi-faceted and complex nature.<sup>25</sup>

### Sampling Procedure

A purposive selection process recruited NHS secondary care sites from a wide geographic base in the United Kingdom. This supported formation an ‘expert’ panel of professionals, knowledgeable in delivering research at teaching, acute or district general hospitals providing services to rural and metropolitan patient populations. Site characteristic diversity, based on scale and nature of operations and patient populations, aimed for a heterogeneous sample minimising bias and facilitating expression of ranging perspectives. To achieve a target sample (n=20) researchers planned to recruit between 22-30 participants. Whilst this is a relatively small sample size the importance in the selection of a Delphi sample is the knowledge and expertise of participants in relation to the research. A smaller sample size is effective when panellists are similarly knowledgeable and expert in the field of study.<sup>26</sup>

### Recruitment Procedure

Principal Investigators at sites approached potential participants based on their knowledge and experience within cancer research delivery. Pre-defined eligibility criteria stipulated professionals should have 18 months experience in a secondary care setting within a research delivery or support role, currently or within the past 18 months.

### Materials and Survey Design

The three-round e-Delphi took place online between January and August 2018 using Qualtrics software. Participant information sheets described the iterative process, commencing with open questions in round one and moving to structured questions in subsequent rounds. The anonymised design meant participants’ identity was unknown to other panellists, a key benefit of the technique.<sup>27</sup> Anonymity facilitates free and open expression of individuals removing the potential for domination by senior or influential colleagues which may lead to bias as participants submit to peer pressure within an open group.<sup>28</sup> References to roles within individual textual responses were removed, protecting participants’ anonymity and preventing role seniority influence on

consensus development. Consenting participants received an invite and link to the online questionnaire. Detailed instructions guided panellists throughout with individual feedback provided between rounds. Experts were encouraged to complete surveys as fully as possible to facilitate comprehension of perspectives, priorities and levels of consensus and support reliability of results. Optional free-text comments at the end of each question section and survey encouraged dialogue, reflection and refinement of observations.

### First Round Survey

Panellists provided their definitions, perceptions and suggestions to seven open questions shown in table 1. The broad nature of questions aimed to generate rich responses iteratively testing inter-connection of phenomena between categories. Individual responses were content analysed and condensed into group statements with care taken to retain as much of participants’ intended meaning as possible. Participants were advised that themes suggested by the panel would be developed as TRIs (trial rating indicators) as part of the TRACAT tool to support workforce and capacity planning.

| Table 1                       | First Round Open Questions                                                                                                                                                                                                                                                                                                                                                  |
|-------------------------------|-----------------------------------------------------------------------------------------------------------------------------------------------------------------------------------------------------------------------------------------------------------------------------------------------------------------------------------------------------------------------------|
| Q1 Follow-up Definition       | The term “follow-up” in clinical trials can have different interpretations dependent upon the role of the researcher. Please provide your definition of the term ‘follow-up’ in relation to cancer clinical trials.                                                                                                                                                         |
| Q2 Barriers & Burdens         | Please describe the phenomena you encounter in your role within cancer clinical research, which you perceive as barriers or burdens to effective trial implementation and delivery. Please feel free to list as many issues or concepts as you wish. These could relate to local, departmental or regional factors as well as cultural, resource and study design elements. |
| Q3 Complexity                 | Please provide your analysis of complexity in terms of delivering cancer clinical trials. This could include the complex nature of the disease or interactions involved in managing the treatment and care pathway for a cancer patient participating in a clinical trial. Please feel free to suggest as many themes as you wish.                                          |
| Q4 Capacity Factors           | Please describe factors affecting your capacity to support and deliver cancer clinical trials within the NHS. These can be elements relative to your specific role, organisation or more global factors. Please list as many considerations as you wish.                                                                                                                    |
| Q5 Top Priorities             | Please suggest your top 3 strategic priorities for the future delivery of cancer clinical trials in the NHS.                                                                                                                                                                                                                                                                |
| Q6 Effective Practice         | Please provide your views on existing elements of cancer clinical research practice within the NHS, which contribute to or demonstrate efficient trial delivery and practice.                                                                                                                                                                                               |
| Q7. Additional Considerations | Please add any additional elements you feel should be considered by the Delphi panel in relation to reviewing the operational delivery, follow-up and complexity of cancer clinical trials.                                                                                                                                                                                 |

## Second Round Survey

Panel-developed statements were circulated alongside a seven-point Likert-type scale ranging from Strongly Disagree (1) to Strongly Agree (7), for participants to confirm their level of agreement. A new survey section (Question 8) asked panellists to rank TRACAT categories from Lowest Priority (1) to Highest Priority (7). To form the initial TRI categories first round responses were coded in NVivo and ranked by frequency of themes.

## Third Round Survey

Panellists received the previous round's results showing the percentage level of agreement and median response to each statement alongside their own selection. Panellists were asked to review initial responses in light of levels of agreement and either revise or leave their original selection unchanged, following reflection on wider perspectives. Participants were encouraged to comment on reasoning for changing responses by more than two scale points away from consensus, or their original selection. Final round panellists received a summary report of consensus statements and ranked TRACAT categories.

## Data Analysis

Open round qualitative data were content analysed and coded in NVivo with quantitative analysis of Likert-type scale responses performed in SPSS version 22.0. Summary statistics reported to panellists described frequency of responses to statements (percentage level) and the median (measure of central tendency). Additionally the Interquartile Range (IQR) was used as a measure of dispersion in analysing stability of responses and move towards consensus in order to decide on the final survey iteration.

## Consensus Level

Consensus was defined as 70% of panellists rating a statement the same on the seven-point Likert-type scale, a recognised level of agreement.<sup>29</sup> Instructions advised participants that a convergence of opinion and the agreed consensus measure would determine the stopping point for the study. Items achieving frequency consensus and median strength of agreement contribute to future questionnaire and interview designs.

## Patient and Public Involvement

A patient advisory group reviewed the study design prior to submission to HRA and ethics with revisions made following their recommendations. Panellists received a final consensus report and other stakeholders had the option to receive results by a preferred method of print, email, Qualtrics or EFACCT website; www.efacct.com.

## RESULTS

The target sample (n=20) was exceeded with thirty-three professionals from 13 hospitals and nine local research networks consenting to join the expert multi-disciplinary panel. The summary demographics and response rates are shown in table 2. Twenty-five research professionals completed the three-round process, an increase of 25% on the initial planned sample, compensating for a 24% participant dropout rate. Regular communication with panel members encouraged retention but robust response rates and continued commitment potentially suggest the study's importance in providing a platform to elucidate role-specific experiences and challenges.

**Table 2** Participant demographics and response rates by round

| Characteristic                                | Round 1   |        | Round 2   |        | Round 3   |        |
|-----------------------------------------------|-----------|--------|-----------|--------|-----------|--------|
|                                               | n         | %      | n         | %      | n         | %      |
| <b>Gender</b>                                 |           |        |           |        |           |        |
| Male                                          | 4         | 14.81% | 4         | 14.81% | 3         | 12.00% |
| Female                                        | 22        | 81.48% | 22        | 81.48% | 21        | 84.00% |
| Other                                         | 1         | 3.70%  | 1         | 3.70%  | 1         | 4.00%  |
| <b>Age</b>                                    |           |        |           |        |           |        |
| 25-34                                         | 3         | 11.11% | 3         | 11.11% | 2         | 8.00%  |
| 35-44                                         | 9         | 33.33% | 9         | 33.33% | 9         | 36.00% |
| 45-54                                         | 10        | 37.04% | 10        | 37.04% | 9         | 36.00% |
| 55-64                                         | 5         | 18.52% | 5         | 18.52% | 5         | 20.00% |
| <b>Years in Clinical Research</b>             |           |        |           |        |           |        |
| Between 2 and 5 years                         | 8         | 29.63% | 9*        | 33.33% | 9         | 36.00% |
| Between 5 and 10 years                        | 11        | 40.74% | 11        | 40.74% | 9         | 36.00% |
| More than 10 years                            | 8         | 29.63% | 7         | 25.93% | 7         | 28.00% |
| <b>Role</b>                                   |           |        |           |        |           |        |
| Research Develop. Manager                     | 4         | 14.81% | 3         | 11.11% | 3         | 12.00% |
| Research Nurse                                | 8         | 29.63% | 9         | 33.33% | 8         | 32.00% |
| Research Nurse Manager                        | 2         | 7.41%  | 2         | 7.41%  | 2         | 8.00%  |
| Chief (CI), Principal (PI) or Co-Investigator | 3         | 11.11% | 3         | 11.11% | 3         | 12.00% |
| Data Manager                                  | 2         | 7.41%  | 2         | 7.41%  | 2         | 8.00%  |
| Clinical/Senior Clinical Trials Practitioner  | 3         | 11.11% | 3         | 11.11% | 2         | 8.00%  |
| Finance Business Partner                      | 1         | 3.70%  | 1         | 3.70%  | 1         | 4.00%  |
| Research Nurse & PI                           | 1         | 3.70%  | 1         | 3.70%  | 1         | 4.00%  |
| Research Support Officer                      | 1         | 3.70%  | 1         | 3.70%  | 1         | 4.00%  |
| Research Radiographer                         | 1         | 3.70%  | 1         | 3.70%  | 1         | 4.00%  |
| Research Pharmacy Technician                  | 1         | 3.70%  | 1         | 3.70%  | 1         | 4.00%  |
| <b>Total Participants</b>                     | <b>27</b> |        | <b>27</b> |        | <b>25</b> |        |

\*One participant joined the study in round 2

## Round one survey results

Round one achieved a response rate of 81.82% with 27 participants completing the initial qualitative survey and demographic information. Open question responses were comprehensive leading to the generation of 531 individual statements, analysed and condensed into 201 group statements.

## Round two survey results

Round two achieved the same response with 15 statements reaching consensus (7.46% of total statements) and a further 53 within potential range of group agreement. One participant joined the panel for the quantitative survey rounds. They did have the option to provide individual feedback through free text comments in line with all other participants.



### Round three survey results

Twenty-five panellists returned the final survey, a response rate of 92.59%. This round included 13 additional statements generated from free text responses. Table 3 details the 75 statements reaching consensus. Additionally, 14 Trial Rating Indicators (TRIs) were identified with four achieving a median rating of 7 (highest priority) and remaining items rated as 6 or 6.5. Non-responders to round two were not included in the third circulation. Based on the groups' move towards consensus the third survey formed the final round.

**Table 3** Consensus Statements by Question Category and Round

| Round 2 Performance                  | Question Category (n) | Question Category (%) | Statements in Category (n) | Total Panel Statements (%) |
|--------------------------------------|-----------------------|-----------------------|----------------------------|----------------------------|
| Q1. Follow-up Definition             | 1                     | 25.00%                | 4                          | 0.50%                      |
| Q2. Barriers & Burdens               | 6                     | 13.04%                | 46                         | 2.99%                      |
| Q3. Complexity                       | 1                     | 2.86%                 | 35                         | 0.50%                      |
| Q4. Capacity Factors                 | 1                     | 2.17%                 | 46                         | 0.50%                      |
| Q5. Top Priorities                   | 2                     | 5.88%                 | 34                         | 1.00%                      |
| Q6. Effective Practice               | 4                     | 15.38%                | 26                         | 1.99%                      |
| Q7. Additional Delphi Considerations | 0                     | 0.00%                 | 10                         | 0.00%                      |
| Round 2 Totals                       | 15                    | —                     | 201                        | 7.46%                      |
| Round 3 Performance                  | Question Category (n) | Question Category (%) | Statements in Category (n) | Total Panel Statements (%) |
| Q1. Follow-up Definition             | 1                     | 25.00%                | 4                          | 0.47%                      |
| Q2. Barriers & Burdens               | 21                    | 45.65%                | 46                         | 9.81%                      |
| Q3. Complexity                       | 10                    | 28.57%                | 35                         | 4.67%                      |
| Q4. Capacity Factors                 | 9                     | 19.57%                | 46                         | 4.21%                      |
| Q5. Top Priorities                   | 23                    | 67.65%                | 34                         | 10.75%                     |
| Q6. Effective Practice               | 9                     | 34.62%                | 26                         | 4.21%                      |
| Q7. Additional Delphi Considerations | 1                     | 4.3%                  | 23                         | 0.47%                      |
| Round 3 Totals                       | 75                    | —                     | 214                        | 35.05%                     |

### Summary of panel responses and discourse

The results provide detailed insights into factors contributing to complexity, follow-up intensity and resource impacts for sites. The researchers chose to retain the broad nature of participant statements following data collection of the initial qualitative open round. As a criterion of the Singerian Delphi, professional panellists needed to witness the diversity, depth and richness of colleague responses. In retaining detailed statements the full nature of participants' sentiments in responses are expressed, allowing the Delphi panel the opportunity to reflect on broader perspectives, concepts and nuances of meaning. Characterising a Singerian inquiring approach the Delphi study served as a process for adding to "substantive knowledge" and "participants' knowledge of themselves" through a group reflective process.<sup>22</sup> Participant feedback was encouraged throughout, supporting the concept of the Delphi as a self-reflective and collective decision-making process, whereby there is a move towards consensus, or a participant's conscious informed choice to revise their opinion or personal philosophy based on wider perspectives of

peer group experiences. Panellists described changes in their perspectives stemming from a new understanding of "how things may be" in different contexts or "in light of more recent experiences and discussion." Other feedback illustrated the nature of changing circumstances and experiences on perceptions and sensitivities during the course of the study, leading to a reflection and adjustment of initial views and recognising the subjective nature of issues. Statements achieving the highest levels of agreement are detailed under each question category. Supplement 1 presents the full list of panel consensus statements.

**Table 4** Q1 Follow-up definition consensus statement Median Consensus Response % Level

|                                                                                                                                                                                                                                                                                                                                                            |                    |     |
|------------------------------------------------------------------------------------------------------------------------------------------------------------------------------------------------------------------------------------------------------------------------------------------------------------------------------------------------------------|--------------------|-----|
| 1.4 NIHR/Nationally Agreed Definition of Follow-Up: A nationally agreed definition of the term 'follow-up' and/or types of 'follow-up' in relation to research delivery in the NHS should be published by the NIHR so that all clinical research professionals, allied professions and associated bodies conform to a standard terminology and parameters. | Strongly Agree (7) | 92% |
|------------------------------------------------------------------------------------------------------------------------------------------------------------------------------------------------------------------------------------------------------------------------------------------------------------------------------------------------------------|--------------------|-----|

### Follow-up Definition

Participants provided personal definitions of 'follow-up' in relation to cancer clinical trial delivery. Responses highlighted diverse interpretations with 56% of panellists defining follow-up as activities relating to any or multiple protocol stages (including active and post treatment phases) whilst 44% identified follow-up as occurring solely post active treatment. Panellists confirmed their level of agreement to summarised definitions of follow-up created from individual interpretations to form three core categories: 1) any trial stage 2) multiple stages 3) post-active treatment. An additional question in round 2 asked panellists to consider the need for a nationally agreed definition supporting research delivery. Panel-developed definitions did not reach consensus but 92% of professionals strongly agreed on a need for a nationally agreed definition of the term and its sub-types (table 4).

### Barriers and Burdens

In round one the panel described phenomena encountered in their roles within research and elements perceived as barriers or burdens to effective practice. This category reached high levels of agreement with 21 statements achieving consensus, the highest of which called for an "effective and consistently validated funding and support model," recognising increased levels of complexity within cancer clinical trials and associated workloads. Panellists agreed strongly (92% consensus) that the funding of research delivery does not "accurately reflect the requirements, time and effort of sites" representing a risk for NHS organisations in delivering effective research with inadequate resources and staffing levels (table 5).

| Table 5 Q2 Barriers & Burdens - Top Consensus Statements |                                                                                                                                                                                                                                                                                                                                                                                                                                                                                                                                                                                                                                                                                                                                                                                                                                                                                                                                                                                | Median             | Consensus % Level |
|----------------------------------------------------------|--------------------------------------------------------------------------------------------------------------------------------------------------------------------------------------------------------------------------------------------------------------------------------------------------------------------------------------------------------------------------------------------------------------------------------------------------------------------------------------------------------------------------------------------------------------------------------------------------------------------------------------------------------------------------------------------------------------------------------------------------------------------------------------------------------------------------------------------------------------------------------------------------------------------------------------------------------------------------------|--------------------|-------------------|
| 2.19                                                     | Trial sites are under constant pressure to open trials with expectations to recruit high numbers of trial participants to increasingly complex and higher intensity trials treating patients with rare cancers whilst being faced with reduced resources. Budgetary constraints and outdated payment terms which do not accurately reflect the requirements, time and effort of sites, represent a high risk to NHS organisations where audited and reduce the capacity to maintain effective trial delivery and meet patient needs through inadequate staffing levels. The NIHR needs to acknowledge the increased complexity of cancer trials, the workload impact in co-ordination and management, augmented lab work & data management demands and comprehend the nature of academic and commercial trials and their associated pressures on research delivery sites and staff through the development of an effective and consistently validated funding & support model. | Strongly Agree (7) | 92%               |
| 2.35                                                     | The management of patient follow-up in cancer studies is a key factor affecting site capacity and ability to implement, recruit to and deliver effective research. Follow-up visits for cancer patients and research studies can continue for many years and often until death. Patients may also transfer from other hospitals for follow-up care, which has an impact on the research staff and capacity at site. Follow-up data is essential to the outcomes of research studies but the NIHR research delivery model focuses on and supports recruitment but not follow-up activities. With continual pressure to open studies to gain accruals the ability of teams to manage existing numbers of patients in follow-up is compromised leading to missed timelines, patient visits and missing data, which could be extremely detrimental to follow-up studies and invalidate results of the trial. These burdens and issues are not recognised within research delivery. | Strongly Agree (7) | 88.00%            |
| 2.13                                                     | Principal Investigator oversight and involvement is lacking at times in certain tumour sites, studies or hospital locations, particularly for multi-site trusts where the PI works from one centre, leaving Research Nurses feeling unsupported. When new studies are set up it is important to ensure there is a clear understanding of roles and responsibilities of the research team so that workloads can be accurately assessed. Principal Investigators should be aware that they could delegate tasks according to GCP but retain overall responsibility for the study beyond the treatment elements and need to maintain involvement in patient follow-up and review.                                                                                                                                                                                                                                                                                                 | Strongly Agree (7) | 88.00%            |
| 2.4                                                      | Support and retention of research professionals, nurses and specialist roles as well as the provision of sufficiently skilled resource should be the focus of the NIHR and Trusts to ensure safe and efficient research environments and reduce excessive workloads. Staff turnover, changes, sickness and absence all have a significant impact on research implementation and delivery at sites.                                                                                                                                                                                                                                                                                                                                                                                                                                                                                                                                                                             | Strongly Agree (7) | 84.00%            |
| 2.23                                                     | Protocols and study documentation supplied to assess capacity and capability do not show the impact of eCRFs or the full extent of information and demographic data required. High data demands and the management of sponsor data queries are a significant and time-consuming administrative burden for sites. Difficulties in communication or slow responses can lead to extended or additional work for sites especially where a sponsor's representative does not comprehend the problems in obtaining retrospective information or understand the nature of certain data issues.                                                                                                                                                                                                                                                                                                                                                                                        | Strongly Agree (7) | 84.00%            |

### Analysis of Complexity

The highest level of consensus within the study was reached in this category with 96% of professionals strongly agreeing growing protocol burden adds to operational complexity (table 6). Ten statements in this domain reached consensus, 60% of which had a consensus level of over 80%. A further 11 statements in this group were in a 10% range of consensus sharing over 60% agreement levels between panellists.

### Factors Affecting Capacity

In round one the panel described factors affecting their capacity to support and deliver cancer trials. Nine statements reached consensus with the highest item level of agreement (88%) alluding to organisational inadequacies in communication, collaboration and integration across services, impeding the effectiveness of trial delivery (table 7).

### Strategic Priorities

The largest number of consensus statements by category related to strategic priorities with 23 items reaching an agreement level of 76% or higher. Five statements shared panel consensus of 88% in terms of their priority for research delivery, four of which related to social aspects of operations; cognition, collaboration and communication (table 8).

### Effective Research Practice

Panellists provided views on existing elements of cancer clinical research practice in the NHS they felt contributed to or demonstrated efficient trial delivery and practice. Statements achieving consensus and a median response of Strongly Agree in this category related to human-centred elements of research delivery with seven statements reaching 80% agreement levels or above (table 9).

| <b>Table 6</b> Q3 Analysis of Complexity - Top Consensus Statements |                                                                                                                                                                                                                                                                                                                                                                                                                                                                                                                                                                                                                                                                                                                   | Median             | Consensus % Level |
|---------------------------------------------------------------------|-------------------------------------------------------------------------------------------------------------------------------------------------------------------------------------------------------------------------------------------------------------------------------------------------------------------------------------------------------------------------------------------------------------------------------------------------------------------------------------------------------------------------------------------------------------------------------------------------------------------------------------------------------------------------------------------------------------------|--------------------|-------------------|
| 3.21                                                                | Cancer clinical trial protocols have varying degrees of complexity but the burden of protocol procedures is growing which adds to the complexity of implementing and delivering studies, with incremental levels of training (e.g. 450 training slides on a 5 arm study with strict guidelines) and increased volumes of tests, questionnaires, visits, assessments and more detailed data requirements.                                                                                                                                                                                                                                                                                                          | Strongly Agree (7) | 96.00%            |
| 3.1                                                                 | Cancer is no longer one diagnosis but a complex range of conditions with many sub-groups. Cancer clinical research complexity is growing as trials now study a wide range of cancers, rare tumours, haematological malignancies and molecular sub-types with treatments becoming precise, targeted and having more options at each stage of the cancer journey. Trials may now only be suitable for a subgroup of the cancer population, such as lymphoma, which has more than 70 sub-types. Sites need to have a greater number of trials open to ensure patients have the opportunity to participate, but each trial will recruit a smaller number of patients adding to the complexity of delivering research. | Strongly Agree (7) | 92.00%            |
| 3.17                                                                | Managing the communication and co-ordination of clinical trial appointments, procedures, and diagnostics, e.g. mammography, ECHO, ECGs, clip insertion, CT scans, bone marrow & surgical/specialist procedures is pressurised and complicated when liaising with multi-disciplinary teams and support services to meet protocol specific timeframes or treatment windows. Aligning a study with the two-week wait or fitting it into a surgical pathway isn't always possible due to operational problems and capacity issues.                                                                                                                                                                                    | Strongly Agree (7) | 88.00%            |
| 3.6                                                                 | The clinical trial phase is a key determinant in study complexity with earlier phase studies typically more complex, requiring lots of visits, extra tests or PK analysis. Early phase clinical trials frequently need input from other departments e.g. ophthalmology or dermatology requiring collaboration to arrange time and appointments. Studies involving overnight stays can be hard to organise due to bed and resource capacity. Admitting patients for trial monitoring can be hard to justify and negotiate when beds are full. Later stage studies such as Phase 3 may include standard of care but complexity is added due to the larger volume of patients required and lengthy follow-up.        | Strongly Agree (7) | 88.00%            |
| 3.16                                                                | Protocol designs that involve short timelines and windows for procedures are more complex and logistically challenging for sites to deliver when trying to schedule registration, randomisation, assessments and treatment around the availability of NHS resources, especially where there is little flexibility from the sponsor. It can be difficult when a patient is excluded from a trial because of scan timings or initial bloods not having been taken by other clinicians who saw the patient first at diagnosis, but not as part of a trial. Additional complexities arise from late diagnostics where a patient comes to the centre late.                                                             | Strongly Agree (7) | 80.00%            |

| <b>Table 7</b> Q4 Factors Affecting Capacity - Top Consensus Statements |                                                                                                                                                                                                                                                                                                                                         | Median             | Consensus % Level |
|-------------------------------------------------------------------------|-----------------------------------------------------------------------------------------------------------------------------------------------------------------------------------------------------------------------------------------------------------------------------------------------------------------------------------------|--------------------|-------------------|
| 4.2                                                                     | Effective communication is the golden thread, which ensures an organisation can work effectively. The lack of integration, communication and collaboration across hospital sites and departments impacts trial delivery.                                                                                                                | Strongly Agree (7) | 88.00%            |
| 4.4                                                                     | Inadequate resources and facilities affect the capacity of research staff to conduct their jobs to the standards expected.                                                                                                                                                                                                              | Strongly Agree (7) | 88.00%            |
| 4.3                                                                     | Inadequate staffing levels make it difficult for teams to meet the demands of current trials and to run as efficiently and effectively as possible.                                                                                                                                                                                     | Strongly Agree (7) | 84.00%            |
| 4.45                                                                    | Protocols, which are overly complicated, do not realistically work with hospital systems or have been written in such a way that they are hard to interpret impact capacity and efficiency. Studies with well-written protocols that consider the practicalities of trial delivery are much easier for sites to run.                    | Strongly Agree (7) | 84.00%            |
| 4.46                                                                    | The increasing complexity of new cancer trials and protocols can be challenging for sites to deliver and therefore detailed feasibility is essential, but the implications of running the study is not always apparent at the outset as frequent or unnecessary amendments can impact the capacity of the team as the study progresses. | Strongly Agree (7) | 84.00%            |

| Table 8 Q5 Top Strategic Priorities - Top Consensus Statements |                                                                                                                                                                                                                                                                            | Median             | Consensus % Level |
|----------------------------------------------------------------|----------------------------------------------------------------------------------------------------------------------------------------------------------------------------------------------------------------------------------------------------------------------------|--------------------|-------------------|
| 5.13                                                           | Decision makers at national and local levels require a greater level of understanding of the constraints, resource and capacity issues and the priorities for research delivery and funding in the NHS.                                                                    | Strongly Agree (7) | 88.00%            |
| 5.2                                                            | Development of biomarkers for predicting suitability and response to treatment and early diagnosis techniques.                                                                                                                                                             | Strongly Agree (7) | 88.00%            |
| 5.20                                                           | Promote cultural change and education to raise the profile of research and highlight the importance of clinical trials in the provision of cancer care within the NHS.                                                                                                     | Strongly Agree (7) | 88.00%            |
| 5.22                                                           | Ensure development of strong working relationships and rapport between research teams and supporting departments.                                                                                                                                                          | Strongly Agree (7) | 88.00%            |
| 5.6                                                            | Improve collaboration and communication between Trusts and organisations (including non-NHS care providers such as hospices) to ensure patient care and choice is prioritised and all are given the opportunity to participate in research, where desired and appropriate. | Strongly Agree (7) | 88.00%            |

| Table 9 Q6 Effective Research Practice - Top Consensus Statements |                                                                                                                                                                                                                                                                                                                                                                                                                     | Median             | Consensus % Level |
|-------------------------------------------------------------------|---------------------------------------------------------------------------------------------------------------------------------------------------------------------------------------------------------------------------------------------------------------------------------------------------------------------------------------------------------------------------------------------------------------------|--------------------|-------------------|
| 6.17                                                              | Good communication skills and effective patient relationships help participants understand the trials and what participation will mean for them.                                                                                                                                                                                                                                                                    | Strongly Agree (7) | 88.00%            |
| 6.2                                                               | Well run, established departments and research teams who receive regular training, are efficient, proactive, flexible to change and demonstrate a wealth of knowledge and excellence in clinical trial delivery.                                                                                                                                                                                                    | Strongly Agree (7) | 84.00%            |
| 6.14                                                              | Principal Investigators who proactively support and engage with the research team, are available to provide advice when required, maintain oversight on their trials, including follow-up visits and discussion of treatment plans, ensure that trials are run effectively and safely in their research area.                                                                                                       | Strongly Agree (7) | 80.00%            |
| 6.18                                                              | Effective practice is demonstrated by dedicated staff who are willing to go above and beyond to recruit and support patients in clinical trials. Caring and skilled research professionals who treat patients as individuals and not just as a recruitment figure are appreciated by patients who value their support, and continue on the trial for follow-up visits and are less likely to withdraw from studies. | Strongly Agree (7) | 80.00%            |
| 6.21                                                              | The provision of dedicated teams and specialists for specific cancer disease areas/sites within trial units enhances research delivery and staff knowledge in their speciality, in contrast to stretching resources across multiple specialisms.                                                                                                                                                                    | Strongly Agree (7) | 80.00%            |

| Table 10 Q7 Additional Delphi Considerations - Consensus Statements |                                                                                                                                                        | Median             | Consensus % Level |
|---------------------------------------------------------------------|--------------------------------------------------------------------------------------------------------------------------------------------------------|--------------------|-------------------|
| 7.3                                                                 | Supporting the primary end points of clinical trials should be the main goal of the NIHR and follow-up should be appropriately funded to achieve this. | Strongly Agree (7) | 72.00%            |

### Additional Delphi Considerations

A final broad category provided participants the opportunity to suggest additional items for panel consideration. Existing categories incorporated related statements but themes which were new, unique or covered multiple areas were presented in section 7. Free-text responses provided by panellists generated 23 statements with one achieving consensus (table 10).

### TRACAT - Trial Rating & Complexity Assessment Tool

First round statements coded within NVivo created 14 Trial Rating Indicators (TRIs) prioritised by panellists from Lowest Priority (1) to Highest Priority (7). Table 4 shows the panel ranking of TRIs which will be used to develop the TRACAT tool. The indicators and rankings are detailed in table 11.

## DISCUSSION

### Overview of main findings

The Delphi's primary aim was to evaluate cancer research delivery with a focus on patient follow-up and complexity from a multi-disciplinary perspective. The study provides in-depth insights of professionals working at the forefront of cancer research delivery, identifying priorities, concerns and trial rating indicators. Consensus and priority factors developed by expert panellists illustrate tensions and pressures within the profession. The main findings are discussed in relation to the key objectives across the eight inter-related survey categories with cross-over themes.



| <b>Table 11</b> Trial Rating Indicators (TRIs) Priority Rankings |      |                                                                                                                                                                                                                  |            |        |
|------------------------------------------------------------------|------|------------------------------------------------------------------------------------------------------------------------------------------------------------------------------------------------------------------|------------|--------|
| Rank                                                             | Q No | TRI Category. 1 (Lowest Priority) - 7 (Highest Priority)                                                                                                                                                         | Priority % | Median |
| 1                                                                | 8.2  | Protocol Procedures - Treatments, interventions, tests, samples and their volumes, frequencies and timelines.                                                                                                    | 72.00%     | 7      |
| 2                                                                | 8.1  | Resource Demands - Feasibility and personnel impact.                                                                                                                                                             | 72.00%     | 7      |
| 3                                                                | 8.7  | Investigational Treatment Complexity - Drug administration, novel therapy/drug, toxicity & risk, treatment windows and timelines.                                                                                | 64.00%     | 7      |
| 4                                                                | 8.5  | Follow-up and Visit Requirements - Type, frequency and duration.                                                                                                                                                 | 60.00%     | 7      |
| 5                                                                | 8.3  | Data Management, Administration & Monitoring - Sponsor defined requirements.                                                                                                                                     | 48.00%     | 6.5    |
| 6                                                                | 8.4  | Support Department Involvement & Outsourcing - Support services (Trust/external), e.g. RECIST reporting, QA procedures, specialist skills, facilities, equipment, central review or sub-contracted requirements. | 48.00%     | 6      |
| 7                                                                | 8.8  | Clinical Efficacy & Safety - Clinical pharmacology and pharmacokinetics requirements.                                                                                                                            | 44.00%     | 6      |
| 8                                                                | 8.11 | Patient Management - patient monitoring, safety, reporting or complex patient pathways.                                                                                                                          | 44.00%     | 6      |
| 9                                                                | 8.12 | Patient Selection - Patient identification, screening, eligibility criteria and consent process.                                                                                                                 | 36.00%     | 6      |
| 10                                                               | 8.6  | Cancer Disease Complexity, Patient Population and Health Status.                                                                                                                                                 | 32.00%     | 6      |
| 11                                                               | 8.13 | Trial Phase and Design - Randomisation process, multiple treatment arms, blinding, study phase.                                                                                                                  | 28.00%     | 6      |
| 12                                                               | 8.10 | Recruitment Potential - Recruitment feasibility and target potential by disease and study type.                                                                                                                  | 24.00%     | 6      |
| 13                                                               | 8.14 | Technology & Training - Sponsor defined requirements for study.                                                                                                                                                  | 24.00%     | 6      |
| 14                                                               | 8.9  | Protocol Variations - Protocol amendments, study extensions and ancillary/sub studies.                                                                                                                           | 16.00%     | 6      |

### Evaluating follow-up and complexity

*Follow-Up Definition:* Patient follow-up in cancer trials is a key factor affecting capacity to deliver research, requiring an ostensive definition to ensure support models for its effective management develop from a clarified and equitable stance. The meaning participants attached to follow-up varied significantly which has implications for operational review. Implementation of a funding model acknowledging resource implications in patient follow-up management reached consensus as a strategic priority. Panellists strongly agreed that managing follow-up was a key factor affecting capacity, calling for recognition of the challenges faced and intimating the NIHR recruitment focused delivery model does not support follow-up. The group expressed a view that follow-up data is essential to successful trial outcomes but felt under pressure to open new studies to gain accruals, with a detrimental effect on their ability to support existing patients.

*Barriers and Burdens:* A common thread running through statements on barriers and burdens within research was an expression of sites being under pressure, with perceptions of high expectations and demands placed on staff whilst faced with reduced resources. Communication issues, both internally and externally, were a common theme and perceived as a barrier to effective research. Concerns also related to sponsor documentation and inadequacy of information to accurately assess capacity and capability, or determine the full impact of delivering a study, in terms of its associated workloads and administrative burden. High levels of agreement between panellists indicated a sense of feeling unsupported, indicating

Principal Investigator oversight and involvement can be lacking at times, recommending a clear understanding of roles, responsibilities and accurate assessment of workloads.

*Analysis of Complexity:* In addition to incremental interventions, tests and procedures within evolving study designs, the panel highlighted factors relating to the nature of cancer as a complex disease. Wide-ranging sub-types and niche patient populations combined with variations in health status and support needs of patients add to research complexity. Whilst trial phase is a recognised contributor to complexity, participants frequently cited short timelines and visit windows for protocol procedures as being problematic, particularly in terms of aligning sponsor requirements to site capacity, treatment pathways and the coordination of procedures, multi-disciplinary teams and support services.

*Factors Affecting Capacity:* Strong consensus existed between research professionals with regard to capacity factors. Inadequacies in staffing levels, funding, resources and facilities featured alongside constraints relating to overly complicated protocols designed without due consideration for practicalities of research delivery. Frequent amendments to trials also affected ongoing capacity reflecting uncertainty within research delivery which cannot always be predicted at site feasibility.

*Strategic Priorities:* Participants strongly agreed on strategic priorities relating to culture, education and collaborative relationships, all social aspects of research delivery. A patient-focused priority reached an 88% consensus on the

1 requirement to develop biomarkers for prediction of suitability  
2 and response to treatment and early diagnosis. The panel came  
3 to the same level of consensus in respect of national and  
4 organisational recognition of the challenges faced by  
5 professionals and sites. A group perspective illustrated the  
6 need for local and national leaders to develop greater  
7 understanding of the “constraints, resource and capacity issues  
8 and the priorities for research delivery and funding in the  
9 NHS”. The high levels of consensus relating to environment,  
10 culture, education, resources and investment delineates the  
11 needs of a profession within an evolving healthcare system,  
12 providing a strong focus for the NIHR and policymakers and  
13 impetus for further dialogue and review.

14 *Effective Research Practice:* Themes of open  
15 communication, staff commitment and dedication, well-  
16 trained and informed staff and strong collaborative teamwork  
17 all achieved high levels of consensus between the Delphi  
18 panellists. These skill sets within the profession allow sites and  
19 research staff to share best practices, retain staff and contribute  
20 to efficient trial delivery despite current challenges and  
21 resource limitations.

22 *Additional Delphi Considerations:* The one statement  
23 achieving consensus in this category called for appropriate  
24 follow-up funding to support the primary endpoints of clinical  
25 trials.

26 *Trial Rating & Complexity Assessment Tool (TRACAT):* A  
27 key outcome of the study is the ranking of trial rating indicators  
28 (TRIs) to develop TRACAT, a system based tool facilitating  
29 the accurate mapping and monitoring of factors determining  
30 study intensity, workload and resource impact on trial centres.  
31 Key stakeholder knowledge is vital in developing operational  
32 evaluation models and panellists had an important study role  
33 in prioritising and ranking TRIs and recommending additional  
34 factors for consideration. Through the assignment of a protocol  
35 acuity score linked to monitoring of interventions, visits,  
36 follow-up and patient volumes TRACAT provides workload  
37 and capacity analysis at individual, site, regional and national  
38 levels. The aim is to create an objective trial rating and  
39 portfolio management tool capable of integrating with existing  
40 data systems, to monitor real-time activity linked to  
41 complexity, increasing the value and structure of data for  
42 strategic and operational decision-making. Enhanced  
43 knowledge of trial acuity will support forecasting and capacity  
44 planning to optimise resource allocation in line with research  
45 objectives and patient needs.

46 *Strategic opportunities for clinical research delivery:* The  
47 study identified shortfalls at local and national levels, relating  
48 to effective communication and shared comprehension of  
49 needs and priorities for research, which provide an immediate  
50 opportunity for service improvements through better  
51 engagement across networks, organisations and disciplines.  
52 Strategic opportunities exist for Trusts, local research  
53 networks, the NIHR and NHS to work collaboratively to

develop specialist services and support models, built on shared  
understanding and structured operational evaluation, to  
increase patient “accessibility, choice and participation in  
clinical trials.” To improve research quality and safety it is  
essential healthcare providers promote open and honest  
cultures focusing on improvement.<sup>30</sup> Professionals and  
organisations alike need to embrace dialectic approaches  
where mutual respect, innovation and communication can  
thrive. Iterative dialogue with research professionals to  
understand critical values and perceptions, relevant to local  
contexts, is vital in identifying effective strategic models and  
measures to improve operational delivery.<sup>31</sup> There is no  
national workforce planning for research delivery and NHS  
global activities for workforce modelling are fragmented.<sup>32</sup> As  
research advances and organisations grow, they face increasing  
challenges and complexities. Dynamic, fluctuating and  
evolving environments call for greater understanding of  
context-specific challenges. This study highlights the current  
realities of research delivery, emphasizing the importance of  
dialogue and shared decision-making in developing effective  
strategies and common goals, respecting mutual  
understanding.

*Evaluating research delivery and performance:* Analysing  
and measuring performance and quality in evolving  
professions and organisations is challenging. Richardson et  
al.<sup>17</sup> argue that an organisation’s measurement of information  
decreases in value as they grow and face greater complexity.  
Evaluation of operational performance and monitoring of  
success needs to take into account not only objective measures  
but also understand and value qualitative evidence to indicate  
progress or success, especially where complexity of  
operational elements is a dominant characteristic. Regular  
evaluative research of the state and nature of the clinical  
research delivery industry in the UK should be an ethical  
requirement of the NHS, NIHR and their partners. There is a  
moral obligation for researchers to ensure that the work they  
undertake and the resource allocated to perform these activities  
provides value, efficiency in service and participant benefit.

*Singerian Inquiry in operational review:* An effective  
evaluation of trial delivery requires a systems approach  
engaging multi-disciplinary professionals from a wide range of  
geographical locations, networks and trusts in a collective  
critique covering multiple realms. Collaborative research  
cultures supporting enhanced data structuring and synthesis  
can “significantly shorten the time gap between clinical  
research results to better clinical care decisions.”<sup>33</sup> The  
nuances and complexities of cancer research delivery  
necessitated a study design involving a critical analysis of  
strategies, processes and technologies through a collation and  
synthesis of prismatic perspectives and experiential data. This  
study supports a systems-based approach to developing  
effective research capacity planning and performs an ethical  
role in the review of current NHS research delivery with the



1  
2 intent of improving performance and patient experience. An  
3 adaptive NHS research delivery framework capable of  
4 analyzing and monitoring research capacity and operational  
5 models in real-time and over time would enhance knowledge  
6 and support strategic planning. This study contributes in-depth  
7 qualitative review into operational aspects of clinical trials by  
8 engaging key stakeholders in defining variables relating to  
9 service pressures as well as highlighting best practices.

10  
11 *Relation to existing research:* Our findings support the  
12 existing body of research documenting increasing pressures on  
13 sites linked to protocol complexity. Growing patient  
14 populations, bespoke therapies and extended follow-up pose  
15 challenges for existing NHS strategies with resources and  
16 research professionals under increasing pressure. The ability to  
17 grow research capacity is limited in systems where  
18 performance measures do not adequately assess complexity  
19 and context or support “tailored research capacity-building  
20 interventions”.<sup>31</sup> Clinical research operational delivery exists  
21 within a complex adaptive system faced with growing  
22 challenges, one that Britnall argues ‘requires us to think, work  
23 and collaborate in different ways’.<sup>32</sup> Outdated, hierarchical  
24 management styles<sup>34</sup> and cognitive dissonance are fuelling a  
25 healthcare staffing crisis and stifling innovation through its  
26 alienation of experienced, knowledgeable and creative  
27 professionals. Britnall discusses the following four key  
28 domains where improvement and investment enhances  
29 productivity: workforce health and well-being, skills  
30 development, technological efficiencies and effective  
31 innovation.<sup>32</sup> Findings of our study reinforce the need for  
32 strategic focus in these domains.

### 33 34 35 36 37 **Strengths and limitations**

38 A strength of the study is the holistic, dialectical, consensus-  
39 based design which is as far as we are aware the first use of a  
40 Singerian Delphi in cancer research evaluation. Qualitative  
41 aspects of the design provided in-depth grounded knowledge  
42 through the ‘voices’ of clinical trial professionals, articulating  
43 human & social aspects of research delivery. The study also  
44 developed consensus-defined trial rating and complexity  
45 indicators (TRIs) to support objective analysis of cancer  
46 research delivery, adaptable to other therapeutic areas and  
47 global settings.

48  
49 Given the exploratory nature of the study in developing a  
50 Singerian focused qualitative Delphi the resulting data sets  
51 were lengthy and expressive. The causal relationships within  
52 the data sets were not fully analysed during the implementation  
53 of the Delphi study. The findings however contribute to the  
54 development of Grounded Theory in wider research being  
55 conducted by the research team. This democratic study  
56 developed new knowledge in defining areas of importance to  
57 research delivery stakeholders and forms part of an iterative  
58 research program to evaluate and support operational delivery.

Participants were limited to patient-facing professionals  
delivering studies at NHS sites in Scotland and England and  
did not include representatives from the Clinical Research  
Network (CRN). The results reflect the perspectives of  
professionals conducting the delivery elements of cancer  
research at trial sites. This does provide a strong understanding  
of the priorities in a clinical setting but enhanced knowledge  
covering the full gamut of roles within the industry is required.  
This Delphi forms part of a programme of study with future  
research planned involving a wider demographic to include  
sponsors, funders, networks and policymakers.

### 38 39 40 41 42 43 44 45 46 47 48 49 50 51 52 53 54 55 56 57 58 59 60 **Implications for practice**

The results point to operational fragmentation and  
organisational disconnect with conflicting priorities limiting  
the ability of the profession to manage growing complexities  
and pressures. The evidence suggests that the current operating  
model is not sustainable for NHS sites. Statements achieving  
the highest level of consensus between Delphi panellists  
outlined growing protocol and procedural burden, calling on  
the NIHR to acknowledge increased complexities in cancer  
clinical trials and associated pressures for sites. Additional  
recommendations included the requirement for a nationally  
agreed definition of follow-up and an effective, consistently  
validated funding and support model.

The research design considered the suitability of the  
Singerian approach within the Delphi method in relation to  
answering the main research question. A Singerian Delphi can  
serve multiple purposes and answer complex and broad  
questions in a single study. Our approach demonstrates a  
pragmatic application of the Singerian Delphi through an  
engagement with multiple perspectives to develop  
collaborative knowledge<sup>35</sup> and a recognition of diversity and  
complexity in understanding separate realities. Retrospectively,  
based on the resultant data and reflection, the Singerian  
approach has emerged as a potential theoretical lens  
to apply in future research investigating operational  
management within healthcare organisations.

### 61 62 63 64 65 66 67 68 69 70 **CONCLUSIONS**

Cancer clinical research delivery forms part of a complex  
system which is in perpetual flux and ill-suited to linear,  
determinate operational models and processes. Disease,  
humans and operational networks, all complex in their own  
respect, continually transpose, synthesise and evolve, requiring  
a prismatic perspective and adaptive, systems-thinking  
approach to comprehend and to design effective, sustainable,  
human-centred research delivery solutions.

In summary, our findings indicate that in order to support  
patient access to clinical trials, meet national research  
ambitions and keep pace with scientific advances in cancer  
research, a delivery model cognisant of complex and diverse  
contextual challenges is required. To deliver quality research

the holistic needs of patients and professionals alike need supporting. Further research into operational efficacy should consider the testing of dialectic models based on the Singerian approach. Whilst the study applied the Singerian approach as a Delphi methodology, it has emerged as a highly appropriate approach to understand and manage the dynamic and evolving field of cancer clinical research as a whole.

**Author affiliations** <sup>1</sup>Lincoln Institute for Health, University of Lincoln, UK <sup>2</sup>Lincolnshire Clinical Research Facility, United Lincolnshire Hospitals Trust, Lincoln, UK <sup>3</sup>Community Health Research Unit, University of Lincoln, UK <sup>4</sup>School of Psychology, University of Bedfordshire, Luton, UK <sup>5</sup>South East Scottish Cancer Research Network (SESCRN), Edinburgh, Scotland, UK

**Acknowledgments** The authors wish to acknowledge the invaluable contribution of Principal Investigators and staff at; United Lincolnshire Hospitals Trust, Edinburgh Cancer Centre, Dumfries & Galloway Royal Infirmary, Clatterbridge Cancer Centre, University College London Hospitals NHS Foundation Trust, Royal Devon & Exeter NHS Foundation Trust, Harrogate & District NHS Foundation Trust, Derby Teaching Hospitals NHS Foundation Trust, University Hospitals Coventry & Warwickshire, Aintree University Hospitals NHS Foundation Trust, Lancashire Teaching Hospital NHS Foundation Trust, North Bristol NHS Trust, Poole Hospital NHS Foundation Trust.

**Author contributions** HMJ was responsible for the study design, data acquisition and analysis and led on manuscript preparation. FC contributed to manuscript preparation, review and revision. GL provided statistical review. FC, GL, CB and TA were responsible for academic and intellectual review of the study design, protocol and manuscript. DB has provided clinical oversight. All authors have read and reviewed the final manuscript.

**Transparency declaration** The lead author\* affirms that this manuscript is an honest, accurate, and transparent account of the study being reported; that no important aspects of the study have been omitted and that any discrepancies from the study as planned (and, if relevant, registered) have been explained. \*The manuscript's guarantor.

**Funding** United Lincolnshire Hospitals NHS Trust (through cancer charitable funds) and the University of Lincoln funded a PhD studentship leading to the study. University of Lincoln as sponsor provided academic and research governance direction.

**Competing interests** None declared.

**Patient consent for publication** Not required.

**Ethical Approval** The study was approved by the East Midlands – Derby Research Ethics Committee (REC reference: 17/EM/0292) and the University of Lincoln School of Health and Social Care Ethics Committee. All participants taking part in the Delphi study provided informed consent.

**Provenance and peer review** Not commissioned; externally peer reviewed.

**Data sharing** Anonymised data will be available on request from the corresponding author.

**Open access** This is an open access article distributed in accordance with the Creative Commons Attribution Non Commercial (CC BY-NC 4.0) license, which permits others to distribute, remix, adapt, build upon this work non-commercially, and license their derivative works on different terms, provided the original work is properly cited and the use is non-commercial. See: <http://creativecommons.org/licenses/by-nc/4.0>.

## REFERENCES

- Downing A, Morris EJ, Corrigan N, et al. High hospital research participation and improved colorectal cancer survival outcomes: a population-based study. *Gut* 2017;66:89-96.
- NHS England. Improving Outcomes through Personalised Medicine. (2016). [Accessed 16 June 2019]. Available from: <https://www.england.nhs.uk/wp-content/uploads/2016/09/improving-outcomes-personalised-medicine.pdf>
- NHS. The NHS Long Term Plan. 2019. Available from: <https://www.longtermplan.nhs.uk/online-version/> [Accessed 12 Aug 2019].
- Bray F, Ferlay J, Soerjomataram I, et al. Global cancer statistics 2018: GLOBOCAN estimates of incidence and mortality worldwide for 36 cancers in 185 countries. *CA Cancer J Clin*. 2018;68:394-424. [Accessed 12 Aug 2019]. Available from: <https://onlinelibrary.wiley.com/doi/epdf/10.3322/caac.21492>
- Malik L, Lu D. Increasing complexity in oncology phase I clinical trials. *Invest New Drugs* 2019;37:519. [Accessed 21 Aug 2019]. Available from: <https://doi.org/10.1007/s10637-018-0699-1>
- National Cancer Policy Forum. Policy Issues in the Clinical Development and Use of Immunotherapy for Cancer Treatment: Proceedings of a Workshop. *National Academies Press* (US) 2016. [Accessed 01 Aug 2019]. Available from: <https://www.ncbi.nlm.nih.gov/books/NBK396430/>
- Gilbert MR, Rubinstein L, Lesser G. Creating clinical trial designs that incorporate clinical outcome assessments. *Neuro Oncol*. 2016;18(2):ii21-ii25. [Accessed 01 Aug 2019].

- 2019] Available from: <https://doi.org/10.1093/neuonc/nov254>
8. Stewart BW, Wild CP. World cancer report 2014. *IARC Publications* 2014. [Accessed 12 Jul 2019]. Available from: <https://publications.iarc.fr/Non-Series-Publications/World-Cancer-Reports/World-Cancer-Report-2014>
  9. Janiaud P, Serghiou S, Ionnidis J, et al. New clinical trial designs in the era of precision medicine: An overview of definitions, strengths, weaknesses, and current use in oncology. *Cancer Treatment Reviews* 2019;73:20 - 30
  10. Getz KA, Kenneth K. Open innovation: the new face of pharmaceutical research and development. *Expert Rev Clin Pharmacol*. 2012;5(5):481-483. [Accessed 21 Jul 2019]. Available from: <https://doi.org/10.1586/ecp.12.44>
  11. Lyddiard J, Briggs J, Berridge J, Coffey M. A workload measurement. *Appl Clin Trials*. 2010. [Accessed 12 Jul 2019] Available from: <http://www.appliedclinicaltrials.com/workload-measurement>
  12. Briggs J, Lyddiard J, Coffey M, et al. When to say 'Yes' in the NHS: Development of a Complexity Scoring System & Management Tool. *CR Focus* 2011;22(1)19-22.
  13. Batchelor J. The Assumptions of Data Capture. *Journal for Clinical Studies* 2017;9(3):46-47.
  14. Alderwick H, Dixon J. The NHS long term plan. *BMJ* 2019;364:184. [Accessed 05 Aug 2019]. Available from: <https://doi.org/10.1136/bmj.l84>.
  15. Paquet G, Ragan T. Through the Detox Prism: Exploring Organisational Failures and Design Responses. Ottawa: Invenire Books; 2012:119-123.
  16. Vaughn VM, Saint S, Krein SL, et al. Characteristics of healthcare organisations struggling to improve quality: results from a systematic review of qualitative studies. *BMJ Qual Saf*. 2019;28:74-84.
  17. Richardson S, Courtney J, Paradise D. An Assessment of the Singerian Inquiring Organizational Model: Cases from Academia and the Utility Industry. *Inf Syst Front*. 2001;3(1):49-62. [Accessed Jul 19 2019]. Available from: <https://link.springer.com/article/10.1023%2FA%3A1011449620792>
  18. Haynes JD. Internet Management Issues: A Global Perspective. London: IGI Global 2012;167-169.
  19. Akins RB, Tolson H, Cole BR. Stability of response characteristics of a Delphi panel: application of bootstrap data expansion. *BMC Med Res Methodol*. 2005;5:37. [Accessed 14 Dec 2018.] Available from: <http://doi.org/10.1186/1471-2288-5-37>
  20. Kennedy HP. Enhancing Delphi research: methods and results. *J Adv Nurs*. 2004;45(5):504-511.
  21. Critcher C, Gladstone B. Utilizing the Delphi Technique in Policy Discussion: A Case Study of a Privatised Utility in Britain. *Public Administration*. 1998; 76:31-449.
  22. Linstone HA, Turoff M. Editors. The Delphi method: Techniques and applications. Newark, NJ: New Jersey Institute of Technology. 2002:167-169. [Accessed 11 Sep.18] Available from <https://web.njit.edu/~turoff/pubs/delphibook.pdf>.
  23. Mozuni M, Jonas W. An Introduction to the Morphological Delphi Method for Design: A Tool for Future-Oriented Design Research, *She Ji: The Journal of Design, Economics, and Innovation*. 2017; 3(4):303-318, [Accessed 14 August 2019] Available from: <https://doi.org/10.1016/j.sheji.2018.02.004>.
  24. Mitroff I, Williams J, Rathswohl. Dialectical inquiring systems: A new methodology for information science. *The Journal of the Association for Information Science and Technology*. 1972; 23(6):365-378. [Accessed 05 Aug 2019]. Available from: <https://doi.org/10.1002/asi.4630230606>
  25. Saukko, P. Doing Research in Cultural Studies: An introduction to classical and new methodological approaches. London: SAGE Publications; 2003:25-27.
  26. Keeney S, McKenna H, Hasson F. The Delphi Technique in Nursing and Health Research. First Edition. Oxford, UK: Wiley; 2011:53.
  27. Hsu C., Sandford BA. The Delphi Technique: Making Sense of Consensus. *Practical Assessment Research & Evaluation*. 2007; 12(10):1-8. [Accessed 12 Sep 2018]. Available from: <https://pareonline.net/pdf/v12n10.pdf>
  28. Keeney S, Hasson F, McKenna H. A critical review of the Delphi technique as a research methodology for nursing. *Int J Nurs Stud*. 2001;38; 195-200.
  29. Vernon, W. The Delphi technique: A review. *Int J Ther Rehabil*. 2009;16(2); 69-76.
  30. HRA. UK Policy Framework for Health and Social Care Research v3.3. 2017:28. [Accessed 12 Aug 2019]. HRA. London. Available from: <https://www.hra.nhs.uk/planning-and-improving-research>
  31. Edwards N, Kaseje D, Kahwa E. Editors. Building and Evaluating Research Capacity in Healthcare Systems: *Case Studies and Innovative Models*. Cape Town: UCT Press: 2016:31.
  32. Britnell, M. Human: Solving the Global Workforce Crisis in Healthcare. London: Oxford University Press: 2019.
  33. Batchelor J. Strength through Collaboration. *Int Clin Trials* 2017;9:24-26.
  34. West, M. The NHS crisis of caring for staff: what do we need to do? Kings Fund 2019. [Accessed 06 Sep 2019]. Available from: <https://www.kingsfund.org.uk/blog/2019/03/nhs-crisis-caring>
  35. Greenhalgh T, Jackson C, Shaw S, Janamian T. Achieving Research Impact Through Co-creation in Community-Based Health Services: Literature Review and Case Study. *Milbank Q*. 2016 Jun;94(2):392-429. doi: 10.1111/1468-0009.12197

1  
2  
3  
4  
5  
6  
7  
8  
9  
10  
11  
12  
13  
14  
15  
16  
17  
18  
19  
20  
21  
22  
23  
24  
25  
26  
27  
28  
29  
30  
31  
32  
33  
34  
35  
36  
37  
38  
39  
40  
41  
42  
43  
44  
45  
46  
47  
48  
49  
50  
51  
52  
53  
54  
55  
56  
57  
58  
59  
60

For peer review only



## Supplement 1 - EFACCT research professional study consensus statements

| Q1   | Follow-up Definition                                                                                                                                                                                                                                                                                                                                                                                                                                                                                                                                                                                                                                                                                                                                                                                                                                                                                                                                                           | Median             | Consensus % Level |
|------|--------------------------------------------------------------------------------------------------------------------------------------------------------------------------------------------------------------------------------------------------------------------------------------------------------------------------------------------------------------------------------------------------------------------------------------------------------------------------------------------------------------------------------------------------------------------------------------------------------------------------------------------------------------------------------------------------------------------------------------------------------------------------------------------------------------------------------------------------------------------------------------------------------------------------------------------------------------------------------|--------------------|-------------------|
| 1.4  | NIHR/Nationally Agreed Definition of Follow -Up: A nationally agreed definition of the term 'follow-up' and/or types of 'follow-up' in relation to research delivery in the NHS should be published by the NIHR so that all clinical research professionals, allied professions and associated bodies conform to a standard terminology and parameters.                                                                                                                                                                                                                                                                                                                                                                                                                                                                                                                                                                                                                        | Strongly Agree (7) | 92%               |
| Q2   | Barriers & Burdens                                                                                                                                                                                                                                                                                                                                                                                                                                                                                                                                                                                                                                                                                                                                                                                                                                                                                                                                                             | Median             | Consensus % Level |
| 2.19 | Trial sites are under constant pressure to open trials with expectations to recruit high numbers of trial participants to increasingly complex and higher intensity trials treating patients with rare cancers whilst being faced with reduced resources. Budgetary constraints and outdated payment terms which do not accurately reflect the requirements, time and effort of sites, represent a high risk to NHS organisations where audited and reduce the capacity to maintain effective trial delivery and meet patient needs through inadequate staffing levels. The NIHR needs to acknowledge the increased complexity of cancer trials, the workload impact in co-ordination and management, augmented lab work & data management demands and comprehend the nature of academic and commercial trials and their associated pressures on research delivery sites and staff through the development of an effective and consistently validated funding & support model. | Strongly Agree (7) | 92%               |
| 2.35 | The management of patient follow-up in cancer studies is a key factor affecting site capacity and ability to implement, recruit to and deliver effective research. Follow-up visits for cancer patients and research studies can continue for many years and often until death. Patients may also transfer from other hospitals for follow-up care, which has an impact on the research staff and capacity at site. Follow-up data is essential to the outcomes of research studies but the NIHR research delivery model focuses on and supports recruitment but not follow-up activities. With continual pressure to open studies to gain accruals the ability of teams to manage existing numbers of patients in follow-up is compromised leading to missed timelines, patient visits and missing data, which could be extremely detrimental to follow-up studies and invalidate results of the trial. These burdens and issues are not recognised within research delivery. | Strongly Agree (7) | 88.00%            |
| 2.13 | Principal Investigator oversight and involvement is lacking at times in certain tumour sites, studies or hospital locations, particularly for multi-site trusts where the PI works from one centre, leaving Research Nurses feeling unsupported. When new studies are set up it is important to ensure there is a clear understanding of roles and responsibilities of the research team so that workloads can be accurately assessed. Principal Investigators should be aware that they could delegate tasks according to GCP but retain overall responsibility for the study beyond the treatment elements and need to maintain involvement in patient follow-up and review.                                                                                                                                                                                                                                                                                                 | Strongly Agree (7) | 88.00%            |
| 2.4  | Support and retention of research professionals, nurses and specialist roles as well as the provision of sufficiently skilled resource should be the focus of the NIHR and Trusts to ensure safe and efficient research environments and reduce excessive workloads. Staff turnover, changes, sickness and absence all have a significant impact on research implementation and delivery at sites.                                                                                                                                                                                                                                                                                                                                                                                                                                                                                                                                                                             | Strongly Agree (7) | 84.00%            |
| 2.23 | Protocols and study documentation supplied to assess capacity and capability do not show the impact of eCRFs or the full extent of information and demographic data required. High data demands and the management of sponsor data queries are a significant and time-consuming administrative burden for sites. Difficulties in communication or slow responses can lead to extended or additional work for sites especially where a sponsor's representative does not comprehend the problems in obtaining retrospective information or understand the nature of certain data issues.                                                                                                                                                                                                                                                                                                                                                                                        | Strongly Agree (7) | 84.00%            |
| 2.22 | Clinical Research Organisations tend to outsource a lot of work which adds to a site's administrative burden and complexity in having to deal with multiple supplier IT platforms and electronic data capture systems (e.g. RTSM, EDC, eCRFs, ePRO & eQoL), all with different user logins and interfaces. The complexities of some systems can require significant time to train which is difficult to include into the busy schedules of teams and represents a further burden to sites.                                                                                                                                                                                                                                                                                                                                                                                                                                                                                     | Strongly Agree (7) | 84.00%            |
| 2.29 | Protocol defined timelines within some trials can be difficult for sites to achieve. Requirements for additional tests at trial entry or specific time points, such as CT scans, ECHOs, ECGs, can be challenging to co-ordinate due to resource issues, limited appointment availability or the length of time taken to receive some results e.g. blood results from pathology or slow reporting of scans from the imaging team.                                                                                                                                                                                                                                                                                                                                                                                                                                                                                                                                               | Strongly Agree (7) | 84.00%            |
| 2.11 | Lack of organisational support to promote and raise the profile of clinical research impacts delivery at multiple levels. Patients may not be aware of the trials running within the organisation limiting their ability to participate or Trust staff/allied clinical professionals who are not research active may be resistant to getting involved or have limited capacity. If research is not part of everyday care and isn't promoted at a Trust, it can be deemed as being an additional element, not a routine choice or less important than other aspects of patient care. Trusts should support the involvement of all staff in research through providing training and/or incentives, in order to change perceptions, raise awareness, increase capacity and enhance collaboration between departments for the benefit of patients and the whole organisation.                                                                                                      | Strongly Agree (7) | 84.00%            |

|    |      |                                                                                                                                                                                                                                                                                                                                                                                                                                                                                                                                                                                                                                                                                                                                                                                                                                           |                    |        |
|----|------|-------------------------------------------------------------------------------------------------------------------------------------------------------------------------------------------------------------------------------------------------------------------------------------------------------------------------------------------------------------------------------------------------------------------------------------------------------------------------------------------------------------------------------------------------------------------------------------------------------------------------------------------------------------------------------------------------------------------------------------------------------------------------------------------------------------------------------------------|--------------------|--------|
| 1  | 2.36 | Protocol amendments can lead to a large additional workload for sites and unplanned resource and capacity burdens. Amendments are becoming increasingly frequent with significant paperwork and administration, sometimes involving only minor changes or lacking clarity on changes. Some sponsors can introduce an entirely new study element via an amendment, which can be hard for sites to decline. Data collection goals are being changed with additional data points added to forms and an expectation for sites to collect this data retrospectively, which is frustrating and time consuming for sites. The additional time to train all delegated staff is a huge problem in a large system and can redirect resource from patient care and treatment to manage the paperwork for amendments on existing trials.              | Strongly Agree (7) | 80.00% |
| 2  | 2.8  | The process of study set up and approval continues to be slow for multiple reasons, but both overall effectiveness of trial implementation and delivery is affected by insufficient resources for administration, data management and the capacity of Finance Business Partners or co-coordinators, compounded by increasing levels of paperwork and administrative burden.                                                                                                                                                                                                                                                                                                                                                                                                                                                               | Strongly Agree (7) | 80.00% |
| 3  | 2.12 | A lack of communication and collaboration between hospital departments, shared care organisations or clinical and non-clinical staff impacts effective research delivery with differing issues and priorities making treatments, interventions or training difficult to implement alongside a lack of understanding of the importance of clinical research, Good Clinical Practice and medical staff not having time to complete relevant training. Research teams can find negotiating time, interest and support of research challenging and exhausting when facing organisational resistance and negativity. When research is viewed in a negative way or is unsupported, it can be demoralising for teams and impede the skills development and confidence of new staff as well as being a significant barrier to efficient research. | Strongly Agree (7) | 80.00% |
| 4  | 2.32 | Clinical pharmacokinetic (PK) studies are becoming increasingly complex with lengthy PK sampling or collection times falling outside of current available clinic hours.                                                                                                                                                                                                                                                                                                                                                                                                                                                                                                                                                                                                                                                                   | Strongly Agree (7) | 80.00% |
| 5  | 2.30 | Cancer research studies can be incredibly complex to deliver with targeted treatments being developed for patients in rare disease groups. Protocol designs are being developed with increasingly high data demands and additional tests, providing supplementary information rather than focused data to answer the research question. The addition of baseline visits between screening and initial treatment visit, requirement for central tissue testing, supply of archival tissue or additional biopsies can be time consuming and challenging for sites to deliver and some sites have limited ability to provide accurate RECIST reporting within the clinical trial timelines.                                                                                                                                                  | Strongly Agree (7) | 80.00% |
| 6  | 2.3  | Due to a lack of research nurses and associated professionals too many trials are being managed by individual staff with research nurses often supporting more than one clinical area e.g. haematology & lung, and within those areas possibly recruiting to 15 or more studies. When managing a large number of studies it is very difficult to truly know all protocols well. Managing high study volumes is challenging particularly as trials are becoming more complex in nature, which limits the capacity of the research team to recruit and follow up patients.                                                                                                                                                                                                                                                                  | Strongly Agree (7) | 80.00% |
| 7  | 2.44 | The lack of IT integration in the NHS is a barrier to efficient trial delivery and data management due to stand alone IT systems, multiple incompatible databases, software providers and imaging systems requiring multiple log ins, and the need for data duplication, re-entry and cross checking causing additional workloads and data queries.                                                                                                                                                                                                                                                                                                                                                                                                                                                                                       | Strongly Agree (7) | 80.00% |
| 8  | 2.6  | Insufficient levels of adequately trained resources can lead to staff feeling pressured to take on additional tasks that do not normally come under their remit, especially in set up, and a lack of clarity or merging of roles and responsibilities places additional burdens on team members. Where there are gaps in certain roles, such as no CNS in a particular speciality, research nurses may feel they need to step in to support a patient, despite their own limited capacity. The full involvement of research nurses in study set up, to ensure accurate assessment of capacity and capability, is time consuming, slow and challenging when trying to balance their clinical commitments, patient follow-up and recruitment to existing studies.                                                                           | Strongly Agree (7) | 80.00% |
| 9  | 2.2  | Trusts believe they can run complex cancer studies but with NHS resources currently stretched and a lack of resource allocation from research networks the capacity to support and maintain effective cancer clinical trial delivery, ensuring patient safety and needs are met is being impacted. Limited infrastructure and staff shortages mean supporting departments such as wards, clinics, radiology, pathology, pharmacy and various medical specialities, are struggling to accommodate additional trial workloads in a timely fashion and too many trials are being managed by individual research staff. Research trial delivery is one of the first areas to be reduced or impacted where a Trust or a department, such as pharmacy, has capacity issues.                                                                     | Strongly Agree (7) | 80.00% |
| 10 | 2.1  | There is a lack of understanding across the NIHR, Sponsors, LCRN's, Trusts and senior management of the complexities and workload in conducting cancer research, for example complex haematology trials, which has led to unrealistic expectations and enormous pressures on research teams at NHS sites.                                                                                                                                                                                                                                                                                                                                                                                                                                                                                                                                 | Strongly Agree (7) | 80.00% |
| 11 | 2.28 | Niche trial designs with narrow inclusion and exclusion criteria or those with very short screening periods (7 days for some activities) can be challenging for sites in meeting the required timelines and a barrier to recruitment.                                                                                                                                                                                                                                                                                                                                                                                                                                                                                                                                                                                                     | Strongly Agree (7) | 76.00% |
| 12 | 2.41 | Difficulties exist due to limited space in clinics or lack of suitable rooms to offer patients the required privacy and sufficient time to explain trials in a comfortable environment without being disturbed, or to take their bloods and conduct other investigations as needed.                                                                                                                                                                                                                                                                                                                                                                                                                                                                                                                                                       | Strongly Agree (7) | 72.00% |



|    |           |                                                                                                                                                                                                                                                                                                                                                                                                                                                                                                                                                                                                                                                                                                                                                                                                                                                                                                                                                                                                                                                                                                          |                    |                          |
|----|-----------|----------------------------------------------------------------------------------------------------------------------------------------------------------------------------------------------------------------------------------------------------------------------------------------------------------------------------------------------------------------------------------------------------------------------------------------------------------------------------------------------------------------------------------------------------------------------------------------------------------------------------------------------------------------------------------------------------------------------------------------------------------------------------------------------------------------------------------------------------------------------------------------------------------------------------------------------------------------------------------------------------------------------------------------------------------------------------------------------------------|--------------------|--------------------------|
| 1  | 2.27      | Barriers to effective trial delivery occur where protocols are not user friendly or have been badly written, where healthcare systems, research professionals or patients have not been consulted during the design stage. A lack of respect for the experiences and knowledge of research delivery staff and patients through failure to involve them in helping design better protocols, CRFs and other study documentation can lead to fundamental design issues, generate data queries, impact efficient trial delivery and add significant burdens for participating sites and patients.                                                                                                                                                                                                                                                                                                                                                                                                                                                                                                            | Strongly Agree (7) | 72.00%                   |
| 6  | <b>Q3</b> | <b>Analysis of Complexity</b>                                                                                                                                                                                                                                                                                                                                                                                                                                                                                                                                                                                                                                                                                                                                                                                                                                                                                                                                                                                                                                                                            | <b>Median</b>      | <b>Consensus % Level</b> |
| 8  | 3.21      | Cancer clinical trial protocols have varying degrees of complexity but the burden of protocol procedures is growing which adds to the complexity of implementing and delivering studies, with incremental levels of training (e.g. 450 training slides on a 5 arm study with strict guidelines) and increased volumes of tests, questionnaires, visits, assessments and more detailed data requirements.                                                                                                                                                                                                                                                                                                                                                                                                                                                                                                                                                                                                                                                                                                 | Strongly Agree (7) | 96.00%                   |
| 13 | 3.1       | Cancer is no longer one diagnosis but a complex range of conditions with many sub-groups. Cancer clinical research complexity is growing as trials now study a wide range of cancers, rare tumours, haematological malignancies and molecular sub-types with treatments becoming precise, targeted and having more options at each stage of the cancer journey. Trials may now only be suitable for a subgroup of the cancer population, such as lymphoma, which has more than 70 sub-types. Sites need to have a greater number of trials open to ensure patients have the opportunity to participate, but each trial will recruit a smaller number of patients adding to the complexity of delivering research.                                                                                                                                                                                                                                                                                                                                                                                        | Strongly Agree (7) | 92.00%                   |
| 20 | 3.17      | Managing the communication and co-ordination of clinical trial appointments, procedures, and diagnostics, e.g. mammography, ECHO, ECGs, clip insertion, CT scans, bone marrow & surgical/specialist procedures is pressurised and complicated when liaising with multi-disciplinary teams and support services to meet protocol specific timeframes or treatment windows. Aligning a study with the two-week wait or fitting it into a surgical pathway isn't always possible due to operational problems and capacity issues.                                                                                                                                                                                                                                                                                                                                                                                                                                                                                                                                                                           | Strongly Agree (7) | 88.00%                   |
| 25 | 3.6       | The clinical trial phase is a key determinant in study complexity with earlier phase studies typically more complex, requiring lots of visits, extra tests or PK analysis. Early phase clinical trials frequently need input from other departments e.g. ophthalmology or dermatology requiring collaboration to arrange time and appointments. Studies involving overnight stays can be hard to organise due to bed and resource capacity. Admitting patients for trial monitoring can be hard to justify and negotiate when beds are full. Later stage studies such as Phase 3 may include standard of care but complexity is added due to the larger volume of patients required and lengthy follow-up.                                                                                                                                                                                                                                                                                                                                                                                               | Strongly Agree (7) | 88.00%                   |
| 33 | 3.16      | Protocol designs that involve short timelines and windows for procedures are more complex and logistically challenging for sites to deliver when trying to schedule registration, randomisation, assessments and treatment around the availability of NHS resources, especially where there is little flexibility from the sponsor. It can be difficult when a patient is excluded from a trial because of scan timings or initial bloods not having been taken by other clinicians who saw the patient first at diagnosis, but not as part of a trial. Additional complexities arise from late diagnostics where a patient comes to the centre late.                                                                                                                                                                                                                                                                                                                                                                                                                                                    | Strongly Agree (7) | 80.00%                   |
| 39 | 3.33      | The management of Adverse Events, Serious Adverse Events and SUSARS can be time consuming in high risk trials or trials where there are a lot of these and can become complex if patients become very unwell. The cancer type, the nature of the patient population and how well they are will all significantly affect the complexity of the study and will affect the number of likely SAEs and amount of clinical input required.                                                                                                                                                                                                                                                                                                                                                                                                                                                                                                                                                                                                                                                                     | Strongly Agree (7) | 80.00%                   |
| 44 | 3.25      | Cancer clinical trial protocols are subject to more amendments than other specialities and are increasing in volume with complex studies having higher rates of amendments. These add to the complexity of delivering research, especially where there a multi-themed amendments, are perceived to get around guidelines or introduce new arms and additional IMPs (of the scale of a new study), likely due to the complexity of setting up several studies.                                                                                                                                                                                                                                                                                                                                                                                                                                                                                                                                                                                                                                            | Strongly Agree (7) | 76.00%                   |
| 48 | 3.3       | Complex trial designs make it difficult to cover the studies of colleagues who are on leave or absent and to maintain a team of skilled staff capable of delivering complex trials who are knowledgeable of patient pathways and treatment regimens. Consistent self-education and motivation is required of cancer research nurses and other research professionals to develop their knowledge to manage the complexities of new processes and treatments, keep ahead of the game, anticipate changes and maintain efficiency.                                                                                                                                                                                                                                                                                                                                                                                                                                                                                                                                                                          | Strongly Agree (7) | 76.00%                   |
| 54 | 3.31      | The relationship between a Research Nurse and a patient on cancer studies is important and can make a significant difference to the patient joining and remaining on a trial. Cancer patients have complex issues and needs, which increases the input from research staff. Research nurses/officers provide patients with information and support, deal with their questions and problems, arrange additional services (e.g. wheelchairs for appointments), keep track of admissions when a patient lives out of the geographical area of the recruiting site and more. Patient support on cancer studies can mean that research nurses have a CNS role, with patients approaching them first and bypassing their CNS. Complexity affects how research nurses can achieve efficiency in running a trial, within the constraints of their specific hospital or geographical location, whilst causing the least disruption to the patient given all their individual needs, such as the distance that the patients needs to drive and trying to keep visits to a minimum or support these over the phone. | Strongly Agree (7) | 76.00%                   |

|    |                                      |                                                                                                                                                                                                                                                                                                                                                                                                                                                                                      |                       |                   |
|----|--------------------------------------|--------------------------------------------------------------------------------------------------------------------------------------------------------------------------------------------------------------------------------------------------------------------------------------------------------------------------------------------------------------------------------------------------------------------------------------------------------------------------------------|-----------------------|-------------------|
| 1  | 3.19                                 | There are complexities in managing logistical issues on studies, such as finding suitable locations for patient review or accessing services and facilities on a large site and where the treatment and laboratory areas are not near the oncology research office.                                                                                                                                                                                                                  | Strongly Agree<br>(7) | 72.00%            |
| 2  | <b>Q4 Factors Affecting Capacity</b> |                                                                                                                                                                                                                                                                                                                                                                                                                                                                                      | Median                | Consensus % Level |
| 3  | 4.2                                  | Effective communication is the golden thread, which ensures an organisation can work effectively. The lack of integration, communication and collaboration across hospital sites and departments impacts trial delivery.                                                                                                                                                                                                                                                             | Strongly Agree<br>(7) | 88.00%            |
| 4  | 4.3                                  | Inadequate staffing levels make it difficult for teams to meet the demands of current trials and to run as efficiently and effectively as possible.                                                                                                                                                                                                                                                                                                                                  | Strongly Agree<br>(7) | 84.00%            |
| 5  | 4.45                                 | Protocols, which are overly complicated, do not realistically work with hospital systems or have been written in such a way that they are hard to interpret impact capacity and efficiency. Studies with well-written protocols that consider the practicalities of trial delivery are much easier for sites to run.                                                                                                                                                                 | Strongly Agree<br>(7) | 84.00%            |
| 6  | 4.46                                 | The increasing complexity of new cancer trials and protocols can be challenging for sites to deliver and therefore detailed feasibility is essential, but the implications of running the study is not always apparent at the outset as frequent or unnecessary amendments can impact the capacity of the team as the study progresses.                                                                                                                                              | Strongly Agree<br>(7) | 84.00%            |
| 7  | 4.8                                  | Allied professional services and support departments such as radiology and pathology are crucial to the running of cancer clinical trials. It is essential that their involvement in trials is adequately rewarded financially and that professionals and teams are motivated by recognition of their scientific or academic contribution to research in trial publications.                                                                                                         | Strongly Agree<br>(7) | 84.00%            |
| 8  | 4.6                                  | Research support staff and data managers are essential to effective trial management and in supporting clinical teams through trial administration, laboratory work, quality assessments and data management, all of which are crucial in answering the clinical trial hypothesis. Ensuring there is continued funding in place to maintain their jobs is time consuming and challenging. Capacity is affected by the lack of data management and administrative resource available. | Strongly Agree<br>(7) | 80.00%            |
| 9  | 4.7                                  | Workforce limitations of support departments involved in trial delivery e.g. radiology, pathology, cardiology etc. affects research capacity with some departments limited by resource and their ability to accommodate additional trial work in a timely manner.                                                                                                                                                                                                                    | Strongly Agree<br>(7) | 80.00%            |
| 10 | 4.1                                  | NHS staffing constraints and reduced funding from the NIHR creates additional work for sites in trying to secure funding from different sources to support staffing or having to spread the attached workload from the reduced posts to existing staff.                                                                                                                                                                                                                              | Strongly Agree<br>(7) | 76.00%            |
| 11 | <b>Q5 Top Strategic Priorities</b>   |                                                                                                                                                                                                                                                                                                                                                                                                                                                                                      | Median                | Consensus % Level |
| 12 | 5.13                                 | Decision makers at national and local levels require a greater level of understanding of the constraints, resource and capacity issues and the priorities for research delivery and funding in the NHS.                                                                                                                                                                                                                                                                              | Strongly Agree<br>(7) | 88.00%            |
| 13 | 5.2                                  | Development of biomarkers for predicting suitability and response to treatment and early diagnosis techniques.                                                                                                                                                                                                                                                                                                                                                                       | Strongly Agree<br>(7) | 88.00%            |
| 14 | 5.20                                 | Promote cultural change and education to raise the profile of research and highlight the importance of clinical trials in the provision of cancer care within the NHS.                                                                                                                                                                                                                                                                                                               | Strongly Agree<br>(7) | 88.00%            |
| 15 | 5.22                                 | Ensure development of strong working relationships and rapport between research teams and supporting departments.                                                                                                                                                                                                                                                                                                                                                                    | Strongly Agree<br>(7) | 88.00%            |
| 16 | 5.6                                  | Improve collaboration and communication between Trusts and organisations (including non-NHS care providers such as hospices) to ensure patient care and choice is prioritised and all are given the opportunity to participate in research, where desired and appropriate.                                                                                                                                                                                                           | Strongly Agree<br>(7) | 88.00%            |
| 17 | 5.12                                 | The structure, activity and provision for research across the UK is variable and inconsistent. CRN funding needs to be reviewed to develop a clear equitable banding structure, which is measured and fairly reflects research activity.                                                                                                                                                                                                                                             | Strongly Agree<br>(7) | 84.00%            |
| 18 | 5.19                                 | Facilitate a detailed multi-disciplinary feasibility process to include all relevant staff and services ensuring all parties have capacity and capability to deliver all elements of the trial from the outset and can provide continued and consistent care during the treatment and follow-up stages.                                                                                                                                                                              | Strongly Agree<br>(7) | 84.00%            |
| 19 | 5.28                                 | Provide research specific induction training for registrars and consultants rotating hospitals to raise awareness of current trials and clinical research activities.                                                                                                                                                                                                                                                                                                                | Strongly Agree<br>(7) | 84.00%            |
| 20 | 5.3                                  | Investment in technology and the development of a national centralised database to enable access to trial information for researchers and patients with the ability to search by tumour site, patient factors and study eligibility in real time to expand trial opportunities to more patient groups.                                                                                                                                                                               | Strongly Agree<br>(7) | 84.00%            |
| 21 | 5.31                                 | Increase the use and uptake of IT systems, software and computer tablets for data capture and storage (e.g. eCRFs and electronic site files), support paper-light research and reduce or remove paper based data forms.                                                                                                                                                                                                                                                              | Strongly Agree<br>(7) | 84.00%            |

|    |           |                                                                                                                                                                                                                                                                                                                                                                                                                     |                    |                          |
|----|-----------|---------------------------------------------------------------------------------------------------------------------------------------------------------------------------------------------------------------------------------------------------------------------------------------------------------------------------------------------------------------------------------------------------------------------|--------------------|--------------------------|
| 1  | 5.4       | Increase accessibility, choice and participation in clinical trials to make a difference for patients in the NHS and to advance medicine, care, survival and access to the best evidence based treatments options.                                                                                                                                                                                                  | Strongly Agree (7) | 84.00%                   |
| 2  |           |                                                                                                                                                                                                                                                                                                                                                                                                                     |                    |                          |
| 3  | 5.7       | Cancer research should be recognised as a speciality area with a core funding model developed to reflect the service and support requirements of research sites and meet the needs of patients within this complex field.                                                                                                                                                                                           | Strongly Agree (7) | 84.00%                   |
| 4  |           |                                                                                                                                                                                                                                                                                                                                                                                                                     |                    |                          |
| 5  | 5.9       | Improve data sharing between departments, hospitals and NHS care providers to facilitate accurate and timely data collection.                                                                                                                                                                                                                                                                                       | Strongly Agree (7) | 84.00%                   |
| 6  |           |                                                                                                                                                                                                                                                                                                                                                                                                                     |                    |                          |
| 7  | 5.11      | Increase external network funding for permanent, highly trained clinical trials staff in all NHS cancer centres and hospitals conducting cancer clinical research.                                                                                                                                                                                                                                                  | Strongly Agree (7) | 80.00%                   |
| 8  |           |                                                                                                                                                                                                                                                                                                                                                                                                                     |                    |                          |
| 9  | 5.14      | The current NIHR targets are unrealistic and frequently unachievable. More realistic objectives and targets should be developed to ensure patient safety, data integrity and trials can be practically delivered relative to the disease and protocol complexity.                                                                                                                                                   | Strongly Agree (7) | 80.00%                   |
| 10 |           |                                                                                                                                                                                                                                                                                                                                                                                                                     |                    |                          |
| 11 | 5.15      | A national costing review across the NHS organisation is required to price research effectively and agree standard costing templates ensuring Trusts accurately invoice for research activities and services provided.                                                                                                                                                                                              | Strongly Agree (7) | 80.00%                   |
| 12 |           |                                                                                                                                                                                                                                                                                                                                                                                                                     |                    |                          |
| 13 | 5.24      | Ensure MHRA inspections are conducted in a professional, collaborative and pragmatic manner working with R&D teams to limit onerous paperwork or the burden of overly bureaucratic procedures.                                                                                                                                                                                                                      | Strongly Agree (7) | 80.00%                   |
| 14 |           |                                                                                                                                                                                                                                                                                                                                                                                                                     |                    |                          |
| 15 | 5.30      | Prioritisation and implementation of a funding model recognising the workload and resource involvement in the provision of patient follow-up and quality data management.                                                                                                                                                                                                                                           | Strongly Agree (7) | 80.00%                   |
| 16 |           |                                                                                                                                                                                                                                                                                                                                                                                                                     |                    |                          |
| 17 | 5.1       | Development of more targeted treatments to be able to offer trials to patients in all cancer areas and provide a balanced portfolio in each tumour group supported at local, regional and national levels.                                                                                                                                                                                                          | Strongly Agree (7) | 76.00%                   |
| 18 |           |                                                                                                                                                                                                                                                                                                                                                                                                                     |                    |                          |
| 19 | 5.16      | Research sites need a way of assessing complexity to allocate resource, which is accurate, validated and future proofed.                                                                                                                                                                                                                                                                                            | Strongly Agree (7) | 76.00%                   |
| 20 |           |                                                                                                                                                                                                                                                                                                                                                                                                                     |                    |                          |
| 21 | 5.18      | Raise awareness of the importance of the continued support of Principal Investigators and Co-Investigators throughout a research study and ensure that they maintain oversight, active involvement and responsibility.                                                                                                                                                                                              | Strongly Agree (7) | 76.00%                   |
| 22 |           |                                                                                                                                                                                                                                                                                                                                                                                                                     |                    |                          |
| 23 | 5.23      | Develop strong and collaborative working relationships between site and sponsor staff.                                                                                                                                                                                                                                                                                                                              | Strongly Agree (7) | 76.00%                   |
| 24 |           |                                                                                                                                                                                                                                                                                                                                                                                                                     |                    |                          |
| 25 | 5.32      | Invest in staff training and development to include cancer specific modules so that research professionals are confident in discussing the disease and trial processes to patients.                                                                                                                                                                                                                                 | Strongly Agree (7) | 76.00%                   |
| 26 |           |                                                                                                                                                                                                                                                                                                                                                                                                                     |                    |                          |
| 27 | <b>Q6</b> | <b>Effective Research Practice</b>                                                                                                                                                                                                                                                                                                                                                                                  | <b>Median</b>      | <b>Consensus % Level</b> |
| 28 |           |                                                                                                                                                                                                                                                                                                                                                                                                                     |                    |                          |
| 29 | 6.17      | Good communication skills and effective patient relationships help participants understand the trials and what participation will mean for them.                                                                                                                                                                                                                                                                    | Strongly Agree (7) | 88.00%                   |
| 30 |           |                                                                                                                                                                                                                                                                                                                                                                                                                     |                    |                          |
| 31 | 6.2       | Well run, established departments and research teams who receive regular training, are efficient, proactive, flexible to change and demonstrate a wealth of knowledge and excellence in clinical trial delivery.                                                                                                                                                                                                    | Strongly Agree (7) | 84.00%                   |
| 32 |           |                                                                                                                                                                                                                                                                                                                                                                                                                     |                    |                          |
| 33 | 6.14      | Principal Investigators who proactively support and engage with the research team, are available to provide advice when required, maintain oversight on their trials, including follow-up visits and discussion of treatment plans, ensure that trials are run effectively and safely in their research area.                                                                                                       | Strongly Agree (7) | 80.00%                   |
| 34 |           |                                                                                                                                                                                                                                                                                                                                                                                                                     |                    |                          |
| 35 | 6.18      | Effective practice is demonstrated by dedicated staff who are willing to go above and beyond to recruit and support patients in clinical trials. Caring and skilled research professionals who treat patients as individuals and not just as a recruitment figure are appreciated by patients who value their support, and continue on the trial for follow-up visits and are less likely to withdraw from studies. | Strongly Agree (7) | 80.00%                   |
| 36 |           |                                                                                                                                                                                                                                                                                                                                                                                                                     |                    |                          |
| 37 | 6.21      | The provision of dedicated teams and specialists for specific cancer disease areas/sites within trial units enhances research delivery and staff knowledge in their speciality, in contrast to stretching resources across multiple specialisms.                                                                                                                                                                    | Strongly Agree (7) | 80.00%                   |
| 38 |           |                                                                                                                                                                                                                                                                                                                                                                                                                     |                    |                          |
| 39 | 6.24      | The dedication, passion and skill of research staff and putting the patient's best interest first greatly contributes to the effective running of trials in the NHS, despite being understaffed, and strong collaborative teamwork supports staff retention under very tight circumstances.                                                                                                                         | Strongly Agree (7) | 80.00%                   |
| 40 |           |                                                                                                                                                                                                                                                                                                                                                                                                                     |                    |                          |
| 41 | 6.25      | Excellent communication and collaboration between supporting departments, clinics, staff roles and specialisms is demonstrated in effective research practice and will support efficient trial delivery.                                                                                                                                                                                                            | Strongly Agree (7) | 80.00%                   |
| 42 |           |                                                                                                                                                                                                                                                                                                                                                                                                                     |                    |                          |
| 43 |           |                                                                                                                                                                                                                                                                                                                                                                                                                     |                    |                          |
| 44 |           |                                                                                                                                                                                                                                                                                                                                                                                                                     |                    |                          |
| 45 |           |                                                                                                                                                                                                                                                                                                                                                                                                                     |                    |                          |
| 46 |           |                                                                                                                                                                                                                                                                                                                                                                                                                     |                    |                          |
| 47 |           |                                                                                                                                                                                                                                                                                                                                                                                                                     |                    |                          |
| 48 |           |                                                                                                                                                                                                                                                                                                                                                                                                                     |                    |                          |
| 49 |           |                                                                                                                                                                                                                                                                                                                                                                                                                     |                    |                          |
| 50 |           |                                                                                                                                                                                                                                                                                                                                                                                                                     |                    |                          |
| 51 |           |                                                                                                                                                                                                                                                                                                                                                                                                                     |                    |                          |
| 52 |           |                                                                                                                                                                                                                                                                                                                                                                                                                     |                    |                          |
| 53 |           |                                                                                                                                                                                                                                                                                                                                                                                                                     |                    |                          |
| 54 |           |                                                                                                                                                                                                                                                                                                                                                                                                                     |                    |                          |
| 55 |           |                                                                                                                                                                                                                                                                                                                                                                                                                     |                    |                          |
| 56 |           |                                                                                                                                                                                                                                                                                                                                                                                                                     |                    |                          |
| 57 |           |                                                                                                                                                                                                                                                                                                                                                                                                                     |                    |                          |
| 58 |           |                                                                                                                                                                                                                                                                                                                                                                                                                     |                    |                          |
| 59 |           |                                                                                                                                                                                                                                                                                                                                                                                                                     |                    |                          |
| 60 |           |                                                                                                                                                                                                                                                                                                                                                                                                                     |                    |                          |

|    |      |                                                                                                                                                                                                                                                                                                                                            |                    |                   |
|----|------|--------------------------------------------------------------------------------------------------------------------------------------------------------------------------------------------------------------------------------------------------------------------------------------------------------------------------------------------|--------------------|-------------------|
| 1  | 6.23 | Positive attitudes, open communication and respect across professions and roles, clear direction and guidance, sharing of best practices and the raising of concerns will support comprehension between all areas and parties involved in clinical research within the NHS and is essential to support future effective research delivery. | Strongly Agree (7) | 76.00%            |
| 2  | 6.7  | Patients are very positive about trial participation and really enjoy acknowledgement of their involvement. Feedback, communication, newsletters or publications through the media or from trial units demonstrates good practice.                                                                                                         | Strongly Agree (7) | 76.00%            |
| 3  | Q7   | Additional Delphi Considerations                                                                                                                                                                                                                                                                                                           | Median             | Consensus % Level |
| 4  | 7.3  | Supporting the primary end points of clinical trials should be the main goal of the NIHR and follow-up should be appropriately funded to achieve this.                                                                                                                                                                                     | Strongly Agree (7) | 72.00%            |
| 5  |      |                                                                                                                                                                                                                                                                                                                                            |                    |                   |
| 6  |      |                                                                                                                                                                                                                                                                                                                                            |                    |                   |
| 7  |      |                                                                                                                                                                                                                                                                                                                                            |                    |                   |
| 8  |      |                                                                                                                                                                                                                                                                                                                                            |                    |                   |
| 9  |      |                                                                                                                                                                                                                                                                                                                                            |                    |                   |
| 10 |      |                                                                                                                                                                                                                                                                                                                                            |                    |                   |
| 11 |      |                                                                                                                                                                                                                                                                                                                                            |                    |                   |
| 12 |      |                                                                                                                                                                                                                                                                                                                                            |                    |                   |
| 13 |      |                                                                                                                                                                                                                                                                                                                                            |                    |                   |
| 14 |      |                                                                                                                                                                                                                                                                                                                                            |                    |                   |
| 15 |      |                                                                                                                                                                                                                                                                                                                                            |                    |                   |
| 16 |      |                                                                                                                                                                                                                                                                                                                                            |                    |                   |
| 17 |      |                                                                                                                                                                                                                                                                                                                                            |                    |                   |
| 18 |      |                                                                                                                                                                                                                                                                                                                                            |                    |                   |
| 19 |      |                                                                                                                                                                                                                                                                                                                                            |                    |                   |
| 20 |      |                                                                                                                                                                                                                                                                                                                                            |                    |                   |
| 21 |      |                                                                                                                                                                                                                                                                                                                                            |                    |                   |
| 22 |      |                                                                                                                                                                                                                                                                                                                                            |                    |                   |
| 23 |      |                                                                                                                                                                                                                                                                                                                                            |                    |                   |
| 24 |      |                                                                                                                                                                                                                                                                                                                                            |                    |                   |
| 25 |      |                                                                                                                                                                                                                                                                                                                                            |                    |                   |
| 26 |      |                                                                                                                                                                                                                                                                                                                                            |                    |                   |
| 27 |      |                                                                                                                                                                                                                                                                                                                                            |                    |                   |
| 28 |      |                                                                                                                                                                                                                                                                                                                                            |                    |                   |
| 29 |      |                                                                                                                                                                                                                                                                                                                                            |                    |                   |
| 30 |      |                                                                                                                                                                                                                                                                                                                                            |                    |                   |
| 31 |      |                                                                                                                                                                                                                                                                                                                                            |                    |                   |
| 32 |      |                                                                                                                                                                                                                                                                                                                                            |                    |                   |
| 33 |      |                                                                                                                                                                                                                                                                                                                                            |                    |                   |
| 34 |      |                                                                                                                                                                                                                                                                                                                                            |                    |                   |
| 35 |      |                                                                                                                                                                                                                                                                                                                                            |                    |                   |
| 36 |      |                                                                                                                                                                                                                                                                                                                                            |                    |                   |
| 37 |      |                                                                                                                                                                                                                                                                                                                                            |                    |                   |
| 38 |      |                                                                                                                                                                                                                                                                                                                                            |                    |                   |
| 39 |      |                                                                                                                                                                                                                                                                                                                                            |                    |                   |
| 40 |      |                                                                                                                                                                                                                                                                                                                                            |                    |                   |
| 41 |      |                                                                                                                                                                                                                                                                                                                                            |                    |                   |
| 42 |      |                                                                                                                                                                                                                                                                                                                                            |                    |                   |
| 43 |      |                                                                                                                                                                                                                                                                                                                                            |                    |                   |
| 44 |      |                                                                                                                                                                                                                                                                                                                                            |                    |                   |
| 45 |      |                                                                                                                                                                                                                                                                                                                                            |                    |                   |
| 46 |      |                                                                                                                                                                                                                                                                                                                                            |                    |                   |
| 47 |      |                                                                                                                                                                                                                                                                                                                                            |                    |                   |
| 48 |      |                                                                                                                                                                                                                                                                                                                                            |                    |                   |
| 49 |      |                                                                                                                                                                                                                                                                                                                                            |                    |                   |
| 50 |      |                                                                                                                                                                                                                                                                                                                                            |                    |                   |
| 51 |      |                                                                                                                                                                                                                                                                                                                                            |                    |                   |
| 52 |      |                                                                                                                                                                                                                                                                                                                                            |                    |                   |
| 53 |      |                                                                                                                                                                                                                                                                                                                                            |                    |                   |
| 54 |      |                                                                                                                                                                                                                                                                                                                                            |                    |                   |
| 55 |      |                                                                                                                                                                                                                                                                                                                                            |                    |                   |
| 56 |      |                                                                                                                                                                                                                                                                                                                                            |                    |                   |
| 57 |      |                                                                                                                                                                                                                                                                                                                                            |                    |                   |
| 58 |      |                                                                                                                                                                                                                                                                                                                                            |                    |                   |
| 59 |      |                                                                                                                                                                                                                                                                                                                                            |                    |                   |
| 60 |      |                                                                                                                                                                                                                                                                                                                                            |                    |                   |

For peer review only

## Research and reporting methodology

Revised **Standards for Quality Improvement Reporting Excellence (SQIRE 2.0)** publication guidelines.

### Notes to authors

- ▶ The SQIRE guidelines provide a framework for reporting new knowledge about how to improve healthcare.
- ▶ The SQIRE guidelines are intended for reports that describe system level work to improve the quality, safety and value of healthcare, and used methods to establish that observed outcomes were due to the intervention(s).
- ▶ A range of approaches exists for improving healthcare. SQIRE may be adapted for reporting any of these.
- ▶ Authors should consider every SQIRE item, but it may be inappropriate or unnecessary to include every SQIRE element in a particular manuscript.
- ▶ The SQIRE glossary contains definitions of many of the key words in SQIRE.
- ▶ The explanation and elaboration document provides specific examples of well-written SQIRE items and an in-depth explanation of each item.
- ▶ Please cite SQIRE when it is used to write a manuscript.

| Text section and item name                                                                                                                                                                                                                           | Page/line no(s).<br>info is located                                                                                                                                           |
|------------------------------------------------------------------------------------------------------------------------------------------------------------------------------------------------------------------------------------------------------|-------------------------------------------------------------------------------------------------------------------------------------------------------------------------------|
| <b>Title and abstract</b>                                                                                                                                                                                                                            |                                                                                                                                                                               |
| <b>1. Title</b>                                                                                                                                                                                                                                      |                                                                                                                                                                               |
| Indicate that the manuscript concerns an initiative to improve healthcare (broadly defined to include the quality, safety, effectiveness, patient-centredness, timeliness, cost, efficiency and equity of healthcare).                               | Page 2. Title includes 'evaluation' implies review of effectiveness for improvement and 'perspectives' which implies 'equity' in using experts in evaluation for improvement. |
| <b>2. Abstract</b>                                                                                                                                                                                                                                   |                                                                                                                                                                               |
| a. Provide adequate information to aid in searching and indexing.                                                                                                                                                                                    | Page 2, Keywords                                                                                                                                                              |
| b. Summarise all key information from various sections of the text using the abstract format of the intended publication or a structured summary such as: background, local problem, methods, interventions, results, conclusions.                   | Page 2                                                                                                                                                                        |
| <b>Introduction: Why did you start?</b>                                                                                                                                                                                                              |                                                                                                                                                                               |
| <b>3. Problem description</b> - Nature and significance of the local problem.                                                                                                                                                                        | Page 2                                                                                                                                                                        |
| <b>4. Available knowledge</b> - Summary of what is currently known about the problem, including relevant previous studies.                                                                                                                           | Page 3                                                                                                                                                                        |
| <b>5. Rationale</b> - Informal or formal frameworks, models, concepts and/or theories used to explain the problem, any reasons or assumptions that were used to develop the intervention(s) and reasons why the intervention(s) was expected to work | Page 3                                                                                                                                                                        |
| <b>6. Specific aims</b> - Purpose of the project and of this report.                                                                                                                                                                                 | Page 3                                                                                                                                                                        |
| <b>Methods: What did you do?</b>                                                                                                                                                                                                                     |                                                                                                                                                                               |
| <b>7. Context</b> - Contextual elements considered important at the outset of introducing the intervention(s).                                                                                                                                       | Page 3                                                                                                                                                                        |

|    |                                                                                                      |                  |
|----|------------------------------------------------------------------------------------------------------|------------------|
| 1  | <b>8. Intervention(s)</b>                                                                            |                  |
| 2  |                                                                                                      |                  |
| 3  | a. Description of the intervention(s) in sufficient detail that others could reproduce it.           | Pages 3-4        |
| 4  | b. Specifics of the team involved in the work.                                                       | Pages 3-4        |
| 5  |                                                                                                      |                  |
| 6  | <b>9. Study of the intervention(s)</b>                                                               |                  |
| 7  | a. Approach chosen for assessing the impact of the intervention(s).                                  | Pages 3-5        |
| 8  | b. Approach used to establish whether the observed outcomes were due to the                          |                  |
| 9  | intervention(s).                                                                                     | Pages 3-5        |
| 10 |                                                                                                      |                  |
| 11 | <b>10. Measures</b>                                                                                  |                  |
| 12 | a. Measures chosen for studying processes and outcomes of the intervention(s), including             |                  |
| 13 | rationale for choosing them, their operational definitions and their validity and reliability.       | Pages 3-5        |
| 14 |                                                                                                      |                  |
| 15 |                                                                                                      | This outcomes    |
| 16 |                                                                                                      | of the study are |
| 17 |                                                                                                      | developing a     |
| 18 |                                                                                                      | tool for ongoing |
| 19 |                                                                                                      | evaluation of    |
| 20 |                                                                                                      | research         |
| 21 |                                                                                                      | delivery and     |
| 22 |                                                                                                      | efficiency. The  |
| 23 |                                                                                                      | actual Delphi    |
| 24 |                                                                                                      | method used is   |
| 25 |                                                                                                      | described in     |
| 26 |                                                                                                      | pages 3-5.       |
| 27 | b. Description of the approach to the ongoing assessment of contextual elements that                 |                  |
| 28 | contributed to the success, failure, efficiency and cost.                                            |                  |
| 29 | c. Methods employed for assessing completeness and accuracy of data.                                 | Pages 4-5        |
| 30 |                                                                                                      |                  |
| 31 | <b>11. Analysis</b>                                                                                  |                  |
| 32 | a. Qualitative and quantitative methods used to draw inferences from the data.                       | Page 5           |
| 33 | b. Methods for understanding variation within the data, including the effects of time as a           |                  |
| 34 | variable.                                                                                            | Page 5           |
| 35 | <b>12. Ethical considerations</b> - Ethical aspects of implementing and studying the intervention(s) |                  |
| 36 | and how they were addressed, including, but not limited to, formal ethics review and                 |                  |
| 37 | potential conflict(s) of interest.                                                                   | Pages 3-5        |
| 38 |                                                                                                      |                  |
| 39 | <b>Results: What did you find?</b>                                                                   |                  |
| 40 | <b>13. Results</b>                                                                                   |                  |
| 41 | a. Initial steps of the intervention(s) and their evolution over time (eg, time-line diagram,        |                  |
| 42 | flow chart or table), including modifications made to the intervention during the project.           | Pages 5-6 & 9    |
| 43 | b. Details of the process measures and outcomes.                                                     | Pages 6-9        |
| 44 | c. Contextual elements that interacted with the intervention(s).                                     | Page 6           |
| 45 | d. Observed associations between outcomes, interventions and relevant contextual                     |                  |
| 46 | elements.                                                                                            | Page 6           |
| 47 | e. Unintended consequences such as unexpected benefits, problems, failures or costs                  |                  |
| 48 | associated with the intervention(s).                                                                 | Page 6           |
| 49 |                                                                                                      |                  |
| 50 | f. Details about missing data.                                                                       | Page 6 - see     |
| 51 |                                                                                                      | table 2 note     |
| 52 |                                                                                                      |                  |
| 53 |                                                                                                      |                  |
| 54 | <b>Discussion: What does it mean?</b>                                                                |                  |
| 55 | <b>14. Summary</b>                                                                                   |                  |
| 56 | a. Key findings, including relevance to the rationale and specific aims.                             | Pages 9-12       |
| 57 | b. Particular strengths of the project.                                                              | Page 12          |



|    |                                                                                                                                                                          |                                                                                         |
|----|--------------------------------------------------------------------------------------------------------------------------------------------------------------------------|-----------------------------------------------------------------------------------------|
| 1  |                                                                                                                                                                          |                                                                                         |
| 2  | <b>15. Interpretation</b>                                                                                                                                                |                                                                                         |
| 3  | a. Nature of the association between the intervention(s) and the outcomes.                                                                                               | Pages 12-13                                                                             |
| 4  | b. Comparison of results with findings from other publications.                                                                                                          | Pages 11-12                                                                             |
| 5  | c. Impact of the project on people and systems.                                                                                                                          | Pages 12-13                                                                             |
| 6  | d. Reasons for any differences between observed and anticipated outcomes, including the influence of context.                                                            | Pages 12-13                                                                             |
| 7  |                                                                                                                                                                          | Ongoing research to fully evaluate- see discussion on purpose of TRACAT and pages 11-13 |
| 8  |                                                                                                                                                                          |                                                                                         |
| 9  |                                                                                                                                                                          |                                                                                         |
| 10 |                                                                                                                                                                          |                                                                                         |
| 11 |                                                                                                                                                                          |                                                                                         |
| 12 |                                                                                                                                                                          |                                                                                         |
| 13 |                                                                                                                                                                          |                                                                                         |
| 14 |                                                                                                                                                                          |                                                                                         |
| 15 |                                                                                                                                                                          |                                                                                         |
| 16 | e. Costs and strategic trade-offs, including opportunity costs.                                                                                                          |                                                                                         |
| 17 |                                                                                                                                                                          |                                                                                         |
| 18 | <b>16. Limitations</b>                                                                                                                                                   |                                                                                         |
| 19 |                                                                                                                                                                          |                                                                                         |
| 20 | a. Limits to the generalisability of the work.                                                                                                                           | Page 12                                                                                 |
| 21 | b. Factors that might have limited internal validity such as confounding, bias or imprecision in the design, methods, measurement or analysis.                           | Page 12                                                                                 |
| 22 |                                                                                                                                                                          |                                                                                         |
| 23 | c. Efforts made to minimise and adjust for limitations.                                                                                                                  | Pages 12-13                                                                             |
| 24 |                                                                                                                                                                          |                                                                                         |
| 25 |                                                                                                                                                                          |                                                                                         |
| 26 | <b>Conclusions</b>                                                                                                                                                       |                                                                                         |
| 27 |                                                                                                                                                                          |                                                                                         |
| 28 | a. Usefulness of the work.                                                                                                                                               | Pages 11-13                                                                             |
| 29 | b. Sustainability.                                                                                                                                                       | Pages 11-13                                                                             |
| 30 | c. Potential for spread to other contexts.                                                                                                                               | Pages 11-13                                                                             |
| 31 | d. Implications for practice and for further study in the field.                                                                                                         | Pages 11-13                                                                             |
| 32 | e. Suggested next steps.                                                                                                                                                 | Pages 12-13                                                                             |
| 33 |                                                                                                                                                                          |                                                                                         |
| 34 |                                                                                                                                                                          |                                                                                         |
| 35 | <b>Other information</b>                                                                                                                                                 |                                                                                         |
| 36 |                                                                                                                                                                          |                                                                                         |
| 37 | <b>18. Funding</b> - Sources of funding that supported this work. Role, if any, of the funding organisation in the design, implementation, interpretation and reporting. | Page 13                                                                                 |
| 38 |                                                                                                                                                                          |                                                                                         |
| 39 |                                                                                                                                                                          |                                                                                         |
| 40 |                                                                                                                                                                          |                                                                                         |
| 41 |                                                                                                                                                                          |                                                                                         |
| 42 |                                                                                                                                                                          |                                                                                         |
| 43 |                                                                                                                                                                          |                                                                                         |
| 44 |                                                                                                                                                                          |                                                                                         |
| 45 |                                                                                                                                                                          |                                                                                         |
| 46 |                                                                                                                                                                          |                                                                                         |
| 47 |                                                                                                                                                                          |                                                                                         |
| 48 |                                                                                                                                                                          |                                                                                         |
| 49 |                                                                                                                                                                          |                                                                                         |
| 50 |                                                                                                                                                                          |                                                                                         |
| 51 |                                                                                                                                                                          |                                                                                         |
| 52 |                                                                                                                                                                          |                                                                                         |
| 53 |                                                                                                                                                                          |                                                                                         |
| 54 |                                                                                                                                                                          |                                                                                         |
| 55 |                                                                                                                                                                          |                                                                                         |
| 56 |                                                                                                                                                                          |                                                                                         |
| 57 |                                                                                                                                                                          |                                                                                         |
| 58 |                                                                                                                                                                          |                                                                                         |
| 59 |                                                                                                                                                                          |                                                                                         |
| 60 |                                                                                                                                                                          |                                                                                         |

Ogrinc G, et al. *BMJ Qual Saf* 2015;0:1–7. doi:10.1136/bmjqs-2015-004411

Downloaded from <http://qualitysafety.bmj.com/> on January 2, 2017

# BMJ Open

## Evaluating Follow-Up and Complexity in Cancer Clinical Trials (EFACCT): An eDelphi study of research professionals' perspectives

|                                 |                                                                                                                                                                                                                                                                                                                                                                                                                                                                                                                                                                    |
|---------------------------------|--------------------------------------------------------------------------------------------------------------------------------------------------------------------------------------------------------------------------------------------------------------------------------------------------------------------------------------------------------------------------------------------------------------------------------------------------------------------------------------------------------------------------------------------------------------------|
| Journal:                        | <i>BMJ Open</i>                                                                                                                                                                                                                                                                                                                                                                                                                                                                                                                                                    |
| Manuscript ID                   | bmjopen-2019-034269.R1                                                                                                                                                                                                                                                                                                                                                                                                                                                                                                                                             |
| Article Type:                   | Original research                                                                                                                                                                                                                                                                                                                                                                                                                                                                                                                                                  |
| Date Submitted by the Author:   | 04-Dec-2019                                                                                                                                                                                                                                                                                                                                                                                                                                                                                                                                                        |
| Complete List of Authors:       | Jones, Helene; University of Lincoln, Lincoln Institute for Health; United Lincolnshire Hospitals NHS Trust, Lincolnshire Clinical Research Facility<br>Curtis, Ffion; University of Lincoln, Lincoln Institute for Health<br>Law, Graham; University of Lincoln, Community Health Research Unit<br>Bridle, Christopher; University of Bedfordshire, School of Psychology<br>Boyle, Dorothy; NHS Lothian, South East Scottish Cancer Research Network (SESCRN)<br>Ahmed, Tanweer; United Lincolnshire Hospitals NHS Trust, Lincolnshire Clinical Research Facility |
| <b>Primary Subject Heading</b>: | Research methods                                                                                                                                                                                                                                                                                                                                                                                                                                                                                                                                                   |
| Secondary Subject Heading:      | Health services research                                                                                                                                                                                                                                                                                                                                                                                                                                                                                                                                           |
| Keywords:                       | Cancer research, follow-up, Delphi methods, protocol complexity, workforce planning, Singerian Inquiry                                                                                                                                                                                                                                                                                                                                                                                                                                                             |
|                                 |                                                                                                                                                                                                                                                                                                                                                                                                                                                                                                                                                                    |

SCHOLARONE™  
Manuscripts

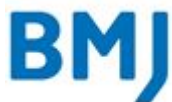

I, the Submitting Author has the right to grant and does grant on behalf of all authors of the Work (as defined in the below author licence), an exclusive licence and/or a non-exclusive licence for contributions from authors who are: i) UK Crown employees; ii) where BMJ has agreed a CC-BY licence shall apply, and/or iii) in accordance with the terms applicable for US Federal Government officers or employees acting as part of their official duties; on a worldwide, perpetual, irrevocable, royalty-free basis to BMJ Publishing Group Ltd ("BMJ") its licensees and where the relevant Journal is co-owned by BMJ to the co-owners of the Journal, to publish the Work in this journal and any other BMJ products and to exploit all rights, as set out in our [licence](#).

The Submitting Author accepts and understands that any supply made under these terms is made by BMJ to the Submitting Author unless you are acting as an employee on behalf of your employer or a postgraduate student of an affiliated institution which is paying any applicable article publishing charge ("APC") for Open Access articles. Where the Submitting Author wishes to make the Work available on an Open Access basis (and intends to pay the relevant APC), the terms of reuse of such Open Access shall be governed by a Creative Commons licence – details of these licences and which [Creative Commons](#) licence will apply to this Work are set out in our licence referred to above.

Other than as permitted in any relevant BMJ Author's Self Archiving Policies, I confirm this Work has not been accepted for publication elsewhere, is not being considered for publication elsewhere and does not duplicate material already published. I confirm all authors consent to publication of this Work and authorise the granting of this licence.

# Evaluating Follow-Up and Complexity in Cancer Clinical Trials (EFACCT): An eDelphi study of research professionals' perspectives

Helene Markham Jones<sup>1,2\*</sup>, Dr. Ffion Curtis<sup>1</sup>, Prof. Graham Law<sup>3</sup>, Prof. Christopher Bridle<sup>4</sup>, Dorothy Boyle<sup>5</sup>, Prof. Tanweer Ahmed<sup>2</sup>.

<sup>1</sup> Lincoln Institute for Health, University of Lincoln, Lincoln, England, United Kingdom, <sup>2</sup> Lincolnshire Clinical Research Facility, United Lincolnshire Hospitals Trust, Lincoln, England, United Kingdom, <sup>3</sup> Community Health Research Unit, University of Lincoln, England, United Kingdom, <sup>4</sup> University of Bedfordshire, Luton, England, United Kingdom, <sup>5</sup> South East Scottish Cancer Research Network (SESCRN), Edinburgh, Scotland, United Kingdom.

\*Corresponding author: Helene Markham Jones

Lincoln Institute for Health, Bridge House, University of Lincoln, Brayford Pool, Lincoln, LN6 7TS

Email address: [hMarkhamJones@lincoln.ac.uk](mailto:hMarkhamJones@lincoln.ac.uk)

Tel: 07515 283991

Word count: 5492

# Evaluating Follow-Up and Complexity in Cancer Clinical Trials (EFACCT): An eDelphi study of research professionals' perspectives

Helene Jones<sup>1, 2</sup>, Ffion Curtis<sup>1</sup>, Graham Law<sup>3</sup>, Christopher Bridle<sup>4</sup>, Dorothy Boyle<sup>5</sup>, Tanweer Ahmed<sup>2</sup>

## ABSTRACT

**Objectives:** To evaluate patient follow-up and complexity in cancer clinical trial delivery, using consensus methods to: 1) identify research professionals' priorities 2) understand localised challenges 3) define study complexity and workloads supporting the development of a Trial Rating And Complexity Assessment Tool: TRACAT.

**Design:** A classic eDelphi completed in three rounds, conducted as the launch study to a multiphase national project (EFACCT).

**Setting:** Multicentre online survey involving professionals at NHS secondary care hospital sites in Scotland and England varied in scale, geographical location and patient populations.

**Participants:** Principal Investigators at 13 hospitals across nine clinical research networks recruited 33 participants using pre-defined eligibility criteria to form a multi-disciplinary panel.

**Main Outcome Measures:** Statements achieving a consensus level of 70% on a seven-point Likert-type scale and ranked Trial Rating Indicators (TRIs) developed by research professionals.

**Results:** The panel developed 75 consensus statements illustrating factors contributing to complexity, follow-up intensity and operational performance in trial delivery, and specified 14 ranked Trial Rating Indicators (TRIs). Seven open questions in the first qualitative round generated 531 individual statements. Iterative survey rounds returned rates of 82%, 82% and 93%.

**Conclusions:** Clinical trials operate within a dynamic, complex healthcare and innovation system where rapid scientific advances present opportunities and challenges for delivery organisations and professionals. Panellists highlighted cultural and organisational factors limiting the profession's potential to support growing trial complexity and patient follow-up. Enhanced communication, interoperability, funding and capacity have emerged as key priorities. Future operational models should test dialectic Singerian-based approaches respecting open dialogue and shared values. Research capacity building should prioritise innovative, collaborative approaches embedding validated review and evaluation models to understand changing operational needs and challenges. TRACAT provides a

## Strengths and limitations of this study

- The multimodal study design developed consensus-defined trial rating and complexity indicators to support objective analysis of cancer research delivery adaptable to operational evaluation in other therapeutic areas and global settings.
- Qualitative aspects provide in-depth contextual evidence through the 'voices' of patient-facing professionals, articulating human & social aspects of research.
- This study is the first, to our knowledge, to present a Delphi methodology adopting a Singerian approach involving research professionals, in a consensus process which is holistic and dialectical.
- The study involved key stakeholders from a wide geographic base reflecting a heterogeneous sample of clinical trial professionals.
- Participants were limited to research professionals delivering studies at NHS sites in Scotland and England. Future research is planned involving a wider demographic to include sponsors, funders, networks and policymakers.

mechanism for continual knowledge assimilation to improve decision-making.

**Keywords:** Cancer research, follow-up, Delphi methods, protocol complexity, workforce planning, Singerian Inquiry.

## INTRODUCTION

Clinical trial delivery in hospital settings is crucial in advancing cancer care and treatment options with evidence indicating sustained commitment to research enhances performance and patient outcomes.<sup>1</sup> Cancer research has evolved rapidly in recent years, with innovations in immunotherapy and precision medicine increasingly prioritised in healthcare policy. The NHS has published ambitions to accelerate innovation, outlining a framework for rapid adoption of next generation treatments offering personalised, stratified care and follow-up models.<sup>2-3</sup>

The ability to translate scientific, laboratory advances in cancer research into clinical and patient benefit through clinical trials is a critical requirement for healthcare providers, as cancer incidence and patient populations continue to grow.<sup>4</sup>

1 Realising these translational benefits is challenging sites  
2 as cancer clinical research trial complexity increases,<sup>5</sup> with  
3 niche designs and stratified treatments affecting research  
4 delivery costs and resources. Cancer research is an  
5 interdisciplinary enterprise advancing patient care and  
6 therapeutic benefits through a collaborative research pathway  
7 involving scientific, translational and clinical research trials.  
8 As trials evolve to study rare diseases, wide-ranging cancers  
9 and molecular sub-types, delivery complexity and workloads  
10 grow in tandem. Intricate protocols, narrow selection criteria,  
11 high data demands and extended safety, efficacy and outcome  
12 monitoring<sup>6-7</sup> are stretching staff and site capabilities.

13  
14 A predicted 70% increase in cancer incidence<sup>8</sup> within 20  
15 years combined with improving survival rates, follow-up  
16 demands and funding pressures necessitates operational review  
17 of trial designs and implementation frameworks to articulate  
18 impacts on sites, patients and professionals. Systematic,  
19 structured evaluation of research delivery in secondary care  
20 (hospital) settings is limited with minimal, current empirical  
21 study of trial complexities and follow-up impacts, workloads,  
22 institutional dynamics or operational processes across complex  
23 healthcare institutions, such as the NHS. In-depth review is a  
24 paramount priority for the healthcare industry to comprehend  
25 variables contributing to service pressures, identify changing  
26 stakeholder needs and facilitate evidence-based commissioning  
27 of services through appropriately aligned funding and support  
28 models.

29  
30  
31 Delivering research in the era of precision medicine is  
32 intense and complex, a clinical reality strongly evidenced in  
33 international literature.<sup>9</sup> Analysis of operational delivery  
34 involving key delivery stakeholders has predominantly  
35 operated at regional levels, limiting global relevance and has  
36 not yet led to transformative models.<sup>10</sup> Lyddiard, J et al.<sup>11</sup>  
37 undertook a UK collaborative study to develop a workload  
38 measurement tool but excluded investigator and pharmacist  
39 roles, anticipating challenges in collating accurate workload  
40 data. Further research recommended qualitative evaluation of  
41 workload and complexity alongside development of trial rating  
42 models using experts whose advice is “fundamental to the  
43 weighting and scoring.”<sup>12</sup> However, within healthcare  
44 applications and systems development there is a persistent lack  
45 of dialogue with “users and implementers of technology for  
46 data capture.”<sup>13</sup> Operational evaluation including assessment  
47 of technologies, training solutions, capacity planning and  
48 research delivery models should involve subject-matter experts  
49 capable of providing grounded knowledge and insight. The  
50 significant complexity gap and incremental patient follow-up  
51 activity requires external recognition. Currently there is no  
52 national analysis of follow-up or protocol complexity  
53 workloads to understand fluctuating operational and resource  
54 demands at local, regional and national levels. Systematic  
55 rating of trial attributes in real time and over study lifetimes  
56 will create longitudinal data sets enabling evidence-based cost  
57 attribution and funding decisions to enhance research capacity  
58  
59  
60

and productivity. The extant literature underlines a need for  
broad, cyclical and continual analysis of research  
advancements and disease burdens to anticipate future  
demands for resources, as well as facilitating sustainable  
growth, productivity and improvements in patient care.

Enabling research growth necessitates structured  
workforce planning yet there is poor application of this crucial  
management function across the NHS.<sup>14</sup> To build capacity,  
manage increasingly complex trials and support patient-  
centred care, research organisations, funders and policy  
makers need to evaluate current delivery and performance  
management models, seek interdisciplinary stakeholder  
feedback and consider adopting creative, design-thinking  
approaches with reflective and critical capabilities.<sup>15</sup> Research  
into Singerian organisational models has shown that holistic  
and dialectic approaches to understanding context-related  
challenges supports process improvement and knowledge  
generation. Organisations cultivating positive communication  
with well-integrated systems are associated with improved  
performance and healthcare outcomes.<sup>16</sup> Holistic, collaborative  
team environments promote valued attributes of respect,  
creativity and knowledge sharing.<sup>17</sup>

## AIMS

Cancer research forms part of a complex collaboration  
between scientists, clinical research professionals and patients.  
Evaluation of patient follow-up in cancer clinical trials and the  
nature of complexity, in its many forms, needs to understand  
the experiences and challenges of research professionals’  
implementing and delivering cancer clinical trials in hospital  
settings. In this study we aimed to contribute to existing  
knowledge of translational cancer research, to support  
acceleration of laboratory advances for patient benefit, by  
engaging research professionals in a democratic, systemic  
evaluation of cancer clinical trial research delivery. We sought  
multi-disciplinary perspectives to: 1) identify research  
professionals’ priorities 2) understand localised challenges 3)  
define study complexities and workloads supporting the  
development of a Trial Rating And Complexity Assessment  
Tool: TRACAT. This study adopted a holistic, consensus-  
based design engaging patient-facing clinical trial  
professionals in developing grounded, contextual knowledge  
of trial implementation and end-user input into the  
development of TRACAT which will function as an  
operational decision-support tool, as well as highlighting  
views, perceptions and priorities for their professional field.

## METHODS

### Study design and approach

To facilitate a detailed systems evaluation sensitive to the  
multi-faceted nature of cancer research delivery a multimodal  
study was developed. The design reflects the Singerian -  
Churchmanian model of Inquiring systems (SCIS) valuing  
ethics and community knowledge in complexity evaluation



and decision-making.<sup>18</sup> The adopted design combining the Delphi technique with a Singerian approach followed an initial scoping review covering subject, policy and methodological literature. The review identified key challenges for the profession directing the overall research and initial survey design. A democratic approach was needed recognising multiple perspectives combined with individual knowledge and experience, to form a comprehensive understanding of the complexities of the systems and networks in which they operate through a dialectical group consensus process, a Singerian Delphi. Singerian-Churchmanian Inquiring Systems provide a framework and meta-method approach to generating actionable knowledge, capable of addressing wicked, complex problems and 'sensemaking in complex, multifaceted, subjective'<sup>19</sup> contexts.

### Delphi technique

The Delphi technique is widely used in healthcare to gain insight from frontline experts knowledgeable within specific fields.<sup>20</sup> It provides practical applications in consensus development, prioritisation, forecasting, policy development and investigation of multi-faceted issues.<sup>20-22</sup> We adopted the method to elicit expert opinion in developing a comprehensive rubric of research delivery variables and in the analysis of complex problems within a group.<sup>23</sup> Healthcare and research delivery operate within complex adaptive systems with diverse and multifarious units, processes and interactions. Analysis of complexity concepts provides an explanatory, sensemaking device to interpret 'phenomena in diverse applications'<sup>24</sup> which are dynamic, emergent and entwined. The professionals recruited to the panel performed an ethical role, as their observations and engagement in identifying trial-rating attributes contribute to designing an evaluation tool for operational decision-making and strategic planning. The design of technical applications or models for strategic evaluation or decision-support and inclusion criteria for measurement or quantitative judgements should be based upon input from 'experts' in the field (patients and professionals), the users and benefactors of 'human-centred automation'.<sup>13,17,23</sup> For this reason, the research commences with a Delphi designed from a Singerian IS (Inquiring System) perspective, drawing ethics and heuristics into the development of an information system and model.<sup>25</sup> This Singerian-orientated Delphi aimed to incorporate diverse knowledge, experience and ideologies of multiple stakeholders, disciplines and personality types<sup>26</sup> to form a prismatic view of cancer research delivery sensitive to its evolving, multi-faceted and complex nature.<sup>27</sup>

### Sampling Procedure

A purposive selection process recruited NHS secondary care (hospital) sites from a wide geographic base in the United Kingdom. This supported formation an 'expert' panel of professionals, knowledgeable in delivering research at

teaching, acute or district general hospitals providing services to rural and metropolitan patient populations. Site characteristic diversity, based on scale and nature of operations and patient populations, aimed for a heterogeneous sample minimising bias and facilitating expression of ranging perspectives. To achieve a target sample (n=20) researchers planned to recruit between 22-30 participants. Whilst this is a relatively small sample size the importance in the selection of a Delphi sample is the knowledge and expertise of participants in relation to the research. The interdisciplinary nature of research and delivery roles required a range of professionals to form an expert panel. A smaller sample size is effective when panellists are similarly knowledgeable and expert in the field of study.<sup>28</sup>

### Recruitment Procedure

Principal Investigators at sites approached potential participants based on their knowledge and experience within cancer research delivery. Pre-defined eligibility criteria stipulated professionals should have 18 months experience in secondary care setting within a research delivery or support role, currently or within the past 18 months.

### Materials and Survey Design

The three-round e-Delphi took place online between January and August 2018 using Qualtrics software. Participant information sheets described the iterative process, commencing with open questions in round one and moving to structured questions in subsequent rounds. The anonymised design meant participants' identity was unknown to other panellists, a key benefit of the technique.<sup>29</sup> Anonymity facilitates free and open expression of individuals removing the potential for domination by senior or influential colleagues which may lead to bias as participants submit to peer pressure within an open group.<sup>30</sup> References to roles within individual textual responses were removed, protecting participants' anonymity and preventing role seniority influence on consensus development. Consenting participants received an invite and link to the online questionnaire. Detailed instructions guided panellists throughout with individual feedback provided between rounds. Experts were encouraged to complete surveys as fully as possible to facilitate comprehension of perspectives, priorities and levels of consensus and support reliability of results. Optional free-text comments at the end of each question section and survey encouraged dialogue, reflection and refinement of observations. The roles of participants and their ethical contribution were detailed in the study information sheets and documents provided to participants who consented to join the 'expert panel'.

### First Round Survey

Panellists provided their definitions, perceptions and suggestions to seven open questions shown in table 1. The broad nature of questions aimed to generate rich responses

iteratively testing inter-connection of phenomena between categories. Individual responses were analysed in NVivo with responses coded thematically. Similar themes were condensed into the initial 201 group statements with care taken to retain as much of participants' intended meaning as possible. Participants were advised that themes suggested by the panel would be developed as TRIs (trial rating indicators) as part of the TRACAT tool to support workforce and capacity planning.

### Second Round Survey

Panel-developed statements were circulated alongside a seven-point Likert-type scale ranging from Strongly Disagree (1) to Strongly Agree (7), for participants to confirm their level of agreement to question category statements 1 to 7. A new survey section (Question 8) asked panellists to rank TRACAT categories from Lowest Priority (1) to Highest Priority (7) as factors to include as trial rating and complexity indicators. To form the initial TRI categories first round responses were coded in NVivo and ranked by frequency of themes.

### Third Round Survey

Panellists received the previous round's results showing the percentage level of agreement and median response to each statement alongside their own selection. Panellists were asked to review initial responses in light of levels of agreement and either revise or leave their original selection unchanged, following reflection on wider perspectives. Participants were encouraged to comment on reasoning for changing responses by more than two scale points away from consensus, or their original selection. Final round panellists received a summary report of consensus statements and ranked TRACAT categories.

### Data Analysis

The qualitative data from the open round were content analysed and coded thematically in NVivo using a framework approach to create the initial complexity categories in question 8. The coded statements relative to each individual question category are shown in Table 1. A second stage of hand coding to validate the initial analysis was performed. Quantitative analysis of the second and third round Likert-type scale responses was performed using SPSS version 22.0. Summary statistics reported to panellists described frequency of responses to statements (percentage level) and the median (measure of central tendency). Additionally the Interquartile Range (IQR) was used as a measure of dispersion in analysing stability of responses and move towards consensus in order to decide on the final survey iteration.

### Consensus Level and Validity

Consensus was defined as 70% of panellists rating a statement the same on the seven-point Likert-type scale, a recognised level of agreement.<sup>31</sup> Instructions advised participants that a convergence of opinion and the agreed

consensus measure would determine the stopping point for the study. Items achieving frequency consensus and median strength of agreement contribute to future questionnaire and interview designs.

### Patient and Public Involvement

A patient advisory group reviewed the study design prior to submission to HRA and ethics with revisions made following their recommendations. Panellists received a final consensus report and other stakeholders had the option to receive results by a preferred method of print, email, Qualtrics or EFACCT website; www.efacct.com.

## RESULTS

The target sample (n=20) was exceeded with thirty-three professionals from 13 hospitals and nine local research networks consenting to join the expert multi-disciplinary panel. 44 potential participants were approached with 11 professionals declining due to limited capacity or availability to complete the surveys. The summary demographics and return rates are shown in table 2. Twenty-five research professionals completed the three-round process, an increase of 25% on the initial planned sample, compensating for a 24%

**Table 1** First Round Open Questions

|                               |                                                                                                                                                                                                                                                                                                                                                                             |
|-------------------------------|-----------------------------------------------------------------------------------------------------------------------------------------------------------------------------------------------------------------------------------------------------------------------------------------------------------------------------------------------------------------------------|
| Q1 Follow-up Definition       | The term "follow-up" in clinical trials can have different interpretations dependent upon the role of the researcher. Please provide your definition of the term 'follow-up' in relation to cancer clinical trials.                                                                                                                                                         |
| Q2 Barriers & Burdens         | Please describe the phenomena you encounter in your role within cancer clinical research, which you perceive as barriers or burdens to effective trial implementation and delivery. Please feel free to list as many issues or concepts as you wish. These could relate to local, departmental or regional factors as well as cultural, resource and study design elements. |
| Q3 Complexity                 | Please provide your analysis of complexity in terms of delivering cancer clinical trials. This could include the complex nature of the disease or interactions involved in managing the treatment and care pathway for a cancer patient participating in a clinical trial. Please feel free to suggest as many themes as you wish.                                          |
| Q4 Capacity Factors           | Please describe factors affecting your capacity to support and deliver cancer clinical trials within the NHS. These can be elements relative to your specific role, organisation or more global factors. Please list as many considerations as you wish.                                                                                                                    |
| Q5 Top Priorities             | Please suggest your top 3 strategic priorities for the future delivery of cancer clinical trials in the NHS.                                                                                                                                                                                                                                                                |
| Q6 Effective Practice         | Please provide your views on existing elements of cancer clinical research practice within the NHS, which contribute to or demonstrate efficient trial delivery and practice.                                                                                                                                                                                               |
| Q7. Additional Considerations | Please add any additional elements you feel should be considered by the Delphi panel in relation to reviewing the operational delivery, follow-up and complexity of cancer clinical trials.                                                                                                                                                                                 |

participant dropout rate. Regular communication with panel members encouraged retention but robust return rates and continued commitment potentially suggest the study's

importance in providing a platform to elucidate role-specific experiences and challenges. The number of panel statements generated in the opening round within each question category are detailed in [table 3](#) alongside the percentage of statements achieving consensus by each category and round.

| Characteristic                                | Round 1   |        | Round 2   |        | Round 3   |        |
|-----------------------------------------------|-----------|--------|-----------|--------|-----------|--------|
|                                               | n         | %      | n         | %      | n         | %      |
| <b>Gender</b>                                 |           |        |           |        |           |        |
| Male                                          | 4         | 14.81% | 4         | 14.81% | 3         | 12.00% |
| Female                                        | 22        | 81.48% | 22        | 81.48% | 21        | 84.00% |
| Other                                         | 1         | 3.70%  | 1         | 3.70%  | 1         | 4.00%  |
| <b>Age</b>                                    |           |        |           |        |           |        |
| 25-34                                         | 3         | 11.11% | 3         | 11.11% | 2         | 8.00%  |
| 35-44                                         | 9         | 33.33% | 9         | 33.33% | 9         | 36.00% |
| 45-54                                         | 10        | 37.04% | 10        | 37.04% | 9         | 36.00% |
| 55-64                                         | 5         | 18.52% | 5         | 18.52% | 5         | 20.00% |
| <b>Years in Clinical Research</b>             |           |        |           |        |           |        |
| Between 2 and 5 years                         | 8         | 29.63% | 9*        | 33.33% | 9         | 36.00% |
| Between 5 and 10 years                        | 11        | 40.74% | 11        | 40.74% | 9         | 36.00% |
| More than 10 years                            | 8         | 29.63% | 7         | 25.93% | 7         | 28.00% |
| <b>Role</b>                                   |           |        |           |        |           |        |
| Research Develop. Manager                     | 4         | 14.81% | 3         | 11.11% | 3         | 12.00% |
| Research Nurse                                | 8         | 29.63% | 9         | 33.33% | 8         | 32.00% |
| Research Nurse Manager                        | 2         | 7.41%  | 2         | 7.41%  | 2         | 8.00%  |
| Chief (CI), Principal (PI) or Co-Investigator | 3         | 11.11% | 3         | 11.11% | 3         | 12.00% |
| Data Manager                                  | 2         | 7.41%  | 2         | 7.41%  | 2         | 8.00%  |
| Clinical/Senior Clinical Trials Practitioner  | 3         | 11.11% | 3         | 11.11% | 2         | 8.00%  |
| Finance Business Partner                      | 1         | 3.70%  | 1         | 3.70%  | 1         | 4.00%  |
| Research Nurse & PI                           | 1         | 3.70%  | 1         | 3.70%  | 1         | 4.00%  |
| Research Support Officer                      | 1         | 3.70%  | 1         | 3.70%  | 1         | 4.00%  |
| Research Radiographer                         | 1         | 3.70%  | 1         | 3.70%  | 1         | 4.00%  |
| Research Pharmacy Technician                  | 1         | 3.70%  | 1         | 3.70%  | 1         | 4.00%  |
| <b>Total Participants</b>                     | <b>27</b> |        | <b>27</b> |        | <b>25</b> |        |

\*One participant joined the study in round 2

### Round one survey results

Round one achieved a return rate of 81.82% with 27 participants completing the initial qualitative survey and demographic information. Open question responses were comprehensive leading to the generation of 531 individual statements, analysed and condensed into 201 group statements.

### Round two survey results

Round two achieved the same response with 15 statements reaching consensus (7.46% of total statements). One participant joined the panel for the quantitative survey rounds. They did have the option to provide individual feedback through free text comments in line with all other participants.

### Round three survey results

Twenty-five panellists returned the final survey, a return rate of 92.59%. This round included 13 additional statements generated from free text responses. [Table 3](#) details the 75 statements reaching consensus. Additionally, 14 Trial Rating Indicators (TRIs) were identified with four achieving a median rating of 7 (highest priority) and remaining items rated as 6 or 6.5. Non-responders to round two were not included in the

third circulation. Based on the groups' move towards consensus the third survey formed the final round.

**Table 3** Consensus Statements by Question Category and Round

| Question Category                    | Question Category (n) | Question Category (%) | Statements in Category (n) | Total Panel Statements (%) |
|--------------------------------------|-----------------------|-----------------------|----------------------------|----------------------------|
| Round 2 Performance                  |                       |                       |                            |                            |
| Q1. Follow-up Definition             | 1                     | 25.00%                | 4                          | 0.50%                      |
| Q2. Barriers & Burdens               | 6                     | 13.04%                | 46                         | 2.99%                      |
| Q3. Complexity                       | 1                     | 2.86%                 | 35                         | 0.50%                      |
| Q4. Capacity Factors                 | 1                     | 2.17%                 | 46                         | 0.50%                      |
| Q5. Top Priorities                   | 2                     | 5.88%                 | 34                         | 1.00%                      |
| Q6. Effective Practice               | 4                     | 15.38%                | 26                         | 1.99%                      |
| Q7. Additional Delphi Considerations | 0                     | 0.00%                 | 10                         | 0.00%                      |
| Round 2 Totals                       | 15                    | —                     | 201                        | 7.46%                      |
| Round 3 Performance                  |                       |                       |                            |                            |
| Q1. Follow-up Definition             | 1                     | 25.00%                | 4                          | 0.47%                      |
| Q2. Barriers & Burdens               | 21                    | 45.65%                | 46                         | 9.81%                      |
| Q3. Complexity                       | 10                    | 28.57%                | 35                         | 4.67%                      |
| Q4. Capacity Factors                 | 9                     | 19.57%                | 46                         | 4.21%                      |
| Q5. Top Priorities                   | 23                    | 67.65%                | 34                         | 10.75%                     |
| Q6. Effective Practice               | 9                     | 34.62%                | 26                         | 4.21%                      |
| Q7. Additional Delphi Considerations | 1                     | 4.3%                  | 23                         | 0.47%                      |
| Round 3 Totals                       | 75                    | —                     | 214                        | 35.05%                     |

### Summary of panel responses and discourse

The results provide detailed insights into factors contributing to complexity, follow-up intensity and resource impacts for sites. The researchers chose to retain the broad nature of participant statements following data collection of the initial qualitative open round. As a criterion of the Singerian Delphi, professional panellists needed to witness the diversity, depth and richness of colleague responses, and the complexity of problems in social settings. In retaining detailed statements the full nature of participants' sentiments in responses are expressed, allowing the Delphi panel the opportunity to reflect on broader perspectives, concepts and nuances of meaning. Characterising a Singerian inquiring approach the Delphi study served as a process for adding to "substantive knowledge" and "participants' knowledge of themselves" through a group reflective process.<sup>23</sup> Participant feedback was encouraged throughout, supporting the concept of the Delphi as a self-reflective and collective decision-making process, whereby there is a move towards consensus, or a participant's conscious informed choice to revise their opinion or personal philosophy based on wider perspectives of peer group experiences. Panellists described changes in their perspectives stemming from a new understanding of "how things may be" in different contexts or "in light of more recent experiences and discussion." Other feedback illustrated the nature of changing circumstances and experiences on perceptions and sensitivities during the course of the study, leading to a reflection and adjustment of initial views and



recognising the subjective nature of issues. Statements achieving the highest levels of agreement are detailed under each question category. [Supplement 1](#) presents the full list of panel consensus statements.

| Table 4                                                                                                                                                                                                                                                                                                                                                     | Median Response    | Consensus % Level |
|-------------------------------------------------------------------------------------------------------------------------------------------------------------------------------------------------------------------------------------------------------------------------------------------------------------------------------------------------------------|--------------------|-------------------|
| Q1 Follow-up definition consensus statement                                                                                                                                                                                                                                                                                                                 |                    |                   |
| 1.4 NIHR/Nationally Agreed Definition of Follow -Up: A nationally agreed definition of the term 'follow-up' and/or types of 'follow-up' in relation to research delivery in the NHS should be published by the NIHR so that all clinical research professionals, allied professions and associated bodies conform to a standard terminology and parameters. | Strongly Agree (7) | 92%               |

### Follow-up Definition

Participants provided personal definitions of 'follow-up' in relation to cancer clinical trial delivery. Responses highlighted diverse interpretations with 56% of panellists defining follow-up as activities relating to any or multiple protocol stages (including active and post treatment phases) whilst 44% identified follow-up as occurring solely post-active treatment. Panellists confirmed their level of agreement to summarised definitions of follow-up created from individual interpretations to form three core categories: 1) any trial stage 2) multiple stages 3) post-active treatment. An additional question in round 2 asked panellists to consider the need for a nationally agreed definition supporting research delivery. Panel-developed definitions did not reach consensus but 92% of professionals strongly agreed on a need for a nationally agreed definition of the term and its sub-types ([table 4](#)).

### Barriers and Burdens

In round one the panel described phenomena encountered in their roles within research and elements perceived as barriers or burdens to effective practice. This category reached high levels of agreement with 21 statements achieving consensus, the highest of which called for an "effective and consistently validated funding and support model," recognising increased levels of complexity within cancer clinical trials and associated workloads. Panellists agreed strongly (92% consensus) that the funding of research delivery does not "accurately reflect the requirements, time and effort of sites" representing a risk for NHS organisations in delivering effective research with inadequate resources and staffing levels ([table 5](#)).

### Analysis of Complexity

The highest level of consensus within the study was reached in this category with 96% of professionals strongly agreeing growing protocol burden adds to operational complexity ([table 6](#)). Ten statements in this domain reached consensus, 60% of which had a consensus level of over 80%. A further 11 statements in this group were in a 10% range of consensus sharing over 60% agreement levels between panellists.

### Factors Affecting Capacity

In round one the panel described factors affecting their capacity to support and deliver cancer trials. Nine statements reached consensus with the highest item level of agreement (88%) alluding to organisational inadequacies in communication, collaboration and integration across services, impeding the effectiveness of trial delivery ([table 7](#)).

### Strategic Priorities

The largest number of consensus statements by category related to strategic priorities with 23 items reaching an agreement level of 76% or higher. Five statements shared panel consensus of 88% in terms of their priority for research delivery, four of which related to social aspects of operations; cognition, collaboration and communication ([table 8](#)).

### Effective Research Practice

Panellists provided views on existing elements of cancer clinical research practice in the NHS they felt contributed to or demonstrated efficient trial delivery and practice. Statements achieving consensus and a median response of Strongly Agree in this category related to human-centred elements of research delivery with seven statements reaching 80% agreement levels or above ([table 9](#)).

### Additional Delphi Considerations

A final broad category provided participants the opportunity to suggest additional items for panel consideration. Existing categories incorporated related statements but themes which were new, unique or covered multiple areas were presented in section 7. Free-text responses provided by panellists generated 23 statements with one achieving consensus ([table 10](#)).

### TRACAT - Trial Rating & Complexity Assessment Tool

First round statements were coded thematically within NVivo creating a matrix of codes which were quantified by frequency of themes to form the initial trial complexity analytical categories of question 8. The 14 Trial Rating Indicators (TRIs) (complexity scoring statements) were prioritised by panellists from Lowest Priority (1) to Highest Priority (7). [Table 4](#) shows the panel ranking of TRIs which will be used to develop the TRACAT tool. The indicators and rankings are detailed in [table 11](#).

| Table 5 Q2 Barriers & Burdens - Top Consensus Statements |                                                                                                                                                                                                                                                                                                                                                                                                                                                                                                                                                                                                                                                                                                                                                                                                                                                                                                                                                                                | Median             | Consensus % Level |
|----------------------------------------------------------|--------------------------------------------------------------------------------------------------------------------------------------------------------------------------------------------------------------------------------------------------------------------------------------------------------------------------------------------------------------------------------------------------------------------------------------------------------------------------------------------------------------------------------------------------------------------------------------------------------------------------------------------------------------------------------------------------------------------------------------------------------------------------------------------------------------------------------------------------------------------------------------------------------------------------------------------------------------------------------|--------------------|-------------------|
| 2.19                                                     | Trial sites are under constant pressure to open trials with expectations to recruit high numbers of trial participants to increasingly complex and higher intensity trials treating patients with rare cancers whilst being faced with reduced resources. Budgetary constraints and outdated payment terms which do not accurately reflect the requirements, time and effort of sites, represent a high risk to NHS organisations where audited and reduce the capacity to maintain effective trial delivery and meet patient needs through inadequate staffing levels. The NIHR needs to acknowledge the increased complexity of cancer trials, the workload impact in co-ordination and management, augmented lab work & data management demands and comprehend the nature of academic and commercial trials and their associated pressures on research delivery sites and staff through the development of an effective and consistently validated funding & support model. | Strongly Agree (7) | 92%               |
| 2.35                                                     | The management of patient follow-up in cancer studies is a key factor affecting site capacity and ability to implement, recruit to and deliver effective research. Follow-up visits for cancer patients and research studies can continue for many years and often until death. Patients may also transfer from other hospitals for follow-up care, which has an impact on the research staff and capacity at site. Follow-up data is essential to the outcomes of research studies but the NIHR research delivery model focuses on and supports recruitment but not follow-up activities. With continual pressure to open studies to gain accruals the ability of teams to manage existing numbers of patients in follow-up is compromised leading to missed timelines, patient visits and missing data, which could be extremely detrimental to follow-up studies and invalidate results of the trial. These burdens and issues are not recognised within research delivery. | Strongly Agree (7) | 88.00%            |
| 2.13                                                     | Principal Investigator oversight and involvement is lacking at times in certain tumour sites, studies or hospital locations, particularly for multi-site trusts where the PI works from one centre, leaving Research Nurses feeling unsupported. When new studies are set up it is important to ensure there is a clear understanding of roles and responsibilities of the research team so that workloads can be accurately assessed. Principal Investigators should be aware that they could delegate tasks according to GCP but retain overall responsibility for the study beyond the treatment elements and need to maintain involvement in patient follow-up and review.                                                                                                                                                                                                                                                                                                 | Strongly Agree (7) | 88.00%            |
| 2.4                                                      | Support and retention of research professionals, nurses and specialist roles as well as the provision of sufficiently skilled resource should be the focus of the NIHR and Trusts to ensure safe and efficient research environments and reduce excessive workloads. Staff turnover, changes, sickness and absence all have a significant impact on research implementation and delivery at sites.                                                                                                                                                                                                                                                                                                                                                                                                                                                                                                                                                                             | Strongly Agree (7) | 84.00%            |
| 2.23                                                     | Protocols and study documentation supplied to assess capacity and capability do not show the impact of eCRFs or the full extent of information and demographic data required. High data demands and the management of sponsor data queries are a significant and time-consuming administrative burden for sites. Difficulties in communication or slow responses can lead to extended or additional work for sites especially where a sponsor's representative does not comprehend the problems in obtaining retrospective information or understand the nature of certain data issues.                                                                                                                                                                                                                                                                                                                                                                                        | Strongly Agree (7) | 84.00%            |



| Table 6 Q3 Analysis of Complexity - Top Consensus Statements |                                                                                                                                                                                                                                                                                                                                                                                                                                                                                                                                                                                                                                                                                                                   | Median             | Consensus %<br>Level |
|--------------------------------------------------------------|-------------------------------------------------------------------------------------------------------------------------------------------------------------------------------------------------------------------------------------------------------------------------------------------------------------------------------------------------------------------------------------------------------------------------------------------------------------------------------------------------------------------------------------------------------------------------------------------------------------------------------------------------------------------------------------------------------------------|--------------------|----------------------|
| 3.21                                                         | Cancer clinical trial protocols have varying degrees of complexity but the burden of protocol procedures is growing which adds to the complexity of implementing and delivering studies, with incremental levels of training (e.g. 450 training slides on a 5 arm study with strict guidelines) and increased volumes of tests, questionnaires, visits, assessments and more detailed data requirements.                                                                                                                                                                                                                                                                                                          | Strongly Agree (7) | 96.00%               |
| 3.1                                                          | Cancer is no longer one diagnosis but a complex range of conditions with many sub-groups. Cancer clinical research complexity is growing as trials now study a wide range of cancers, rare tumours, haematological malignancies and molecular sub-types with treatments becoming precise, targeted and having more options at each stage of the cancer journey. Trials may now only be suitable for a subgroup of the cancer population, such as lymphoma, which has more than 70 sub-types. Sites need to have a greater number of trials open to ensure patients have the opportunity to participate, but each trial will recruit a smaller number of patients adding to the complexity of delivering research. | Strongly Agree (7) | 92.00%               |
| 3.17                                                         | Managing the communication and co-ordination of clinical trial appointments, procedures, and diagnostics, e.g. mammography, ECHO, ECGs, clip insertion, CT scans, bone marrow & surgical/specialist procedures is pressurised and complicated when liaising with multi-disciplinary teams and support services to meet protocol specific timeframes or treatment windows. Aligning a study with the two-week wait or fitting it into a surgical pathway isn't always possible due to operational problems and capacity issues.                                                                                                                                                                                    | Strongly Agree (7) | 88.00%               |
| 3.6                                                          | The clinical trial phase is a key determinant in study complexity with earlier phase studies typically more complex, requiring lots of visits, extra tests or PK analysis. Early phase clinical trials frequently need input from other departments e.g. ophthalmology or dermatology requiring collaboration to arrange time and appointments. Studies involving overnight stays can be hard to organise due to bed and resource capacity. Admitting patients for trial monitoring can be hard to justify and negotiate when beds are full. Later stage studies such as Phase 3 may include standard of care but complexity is added due to the larger volume of patients required and lengthy follow-up.        | Strongly Agree (7) | 88.00%               |
| 3.16                                                         | Protocol designs that involve short timelines and windows for procedures are more complex and logistically challenging for sites to deliver when trying to schedule registration, randomisation, assessments and treatment around the availability of NHS resources, especially where there is little flexibility from the sponsor. It can be difficult when a patient is excluded from a trial because of scan timings or initial bloods not having been taken by other clinicians who saw the patient first at diagnosis, but not as part of a trial. Additional complexities arise from late diagnostics where a patient comes to the centre late.                                                             | Strongly Agree (7) | 80.00%               |

| <b>Table 7</b> Q4 Factors Affecting Capacity - Top Consensus Statements |                                                                                                                                                                                                                                                                                                                                         | Median             | Consensus %<br>Level |
|-------------------------------------------------------------------------|-----------------------------------------------------------------------------------------------------------------------------------------------------------------------------------------------------------------------------------------------------------------------------------------------------------------------------------------|--------------------|----------------------|
| 4.2                                                                     | Effective communication is the golden thread, which ensures an organisation can work effectively. The lack of integration, communication and collaboration across hospital sites and departments impacts trial delivery.                                                                                                                | Strongly Agree (7) | 88.00%               |
| 4.4                                                                     | Inadequate resources and facilities affect the capacity of research staff to conduct their jobs to the standards expected.                                                                                                                                                                                                              | Strongly Agree (7) | 88.00%               |
| 4.3                                                                     | Inadequate staffing levels make it difficult for teams to meet the demands of current trials and to run as efficiently and effectively as possible.                                                                                                                                                                                     | Strongly Agree (7) | 84.00%               |
| 4.45                                                                    | Protocols, which are overly complicated, do not realistically work with hospital systems or have been written in such a way that they are hard to interpret impact capacity and efficiency. Studies with well-written protocols that consider the practicalities of trial delivery are much easier for sites to run.                    | Strongly Agree (7) | 84.00%               |
| 4.46                                                                    | The increasing complexity of new cancer trials and protocols can be challenging for sites to deliver and therefore detailed feasibility is essential, but the implications of running the study is not always apparent at the outset as frequent or unnecessary amendments can impact the capacity of the team as the study progresses. | Strongly Agree (7) | 84.00%               |

| <b>Table 8</b> Q5 Top Strategic Priorities - Top Consensus Statements |                                                                                                                                                                                                                                                                            | Median             | Consensus %<br>Level |
|-----------------------------------------------------------------------|----------------------------------------------------------------------------------------------------------------------------------------------------------------------------------------------------------------------------------------------------------------------------|--------------------|----------------------|
| 5.13                                                                  | Decision makers at national and local levels require a greater level of understanding of the constraints, resource and capacity issues and the priorities for research delivery and funding in the NHS.                                                                    | Strongly Agree (7) | 88.00%               |
| 5.2                                                                   | Development of biomarkers for predicting suitability and response to treatment and early diagnosis techniques.                                                                                                                                                             | Strongly Agree (7) | 88.00%               |
| 5.20                                                                  | Promote cultural change and education to raise the profile of research and highlight the importance of clinical trials in the provision of cancer care within the NHS.                                                                                                     | Strongly Agree (7) | 88.00%               |
| 5.22                                                                  | Ensure development of strong working relationships and rapport between research teams and supporting departments.                                                                                                                                                          | Strongly Agree (7) | 88.00%               |
| 5.6                                                                   | Improve collaboration and communication between Trusts and organisations (including non-NHS care providers such as hospices) to ensure patient care and choice is prioritised and all are given the opportunity to participate in research, where desired and appropriate. | Strongly Agree (7) | 88.00%               |

| <b>Table 9</b> Q6 Effective Research Practice - Top Consensus Statements |                                                                                                                                                                                                                                                                                                                                                                                                                     | Median             | Consensus %<br>Level |
|--------------------------------------------------------------------------|---------------------------------------------------------------------------------------------------------------------------------------------------------------------------------------------------------------------------------------------------------------------------------------------------------------------------------------------------------------------------------------------------------------------|--------------------|----------------------|
| 6.17                                                                     | Good communication skills and effective patient relationships help participants understand the trials and what participation will mean for them.                                                                                                                                                                                                                                                                    | Strongly Agree (7) | 88.00%               |
| 6.2                                                                      | Well run, established departments and research teams who receive regular training, are efficient, proactive, flexible to change and demonstrate a wealth of knowledge and excellence in clinical trial delivery.                                                                                                                                                                                                    | Strongly Agree (7) | 84.00%               |
| 6.14                                                                     | Principal Investigators who proactively support and engage with the research team, are available to provide advice when required, maintain oversight on their trials, including follow-up visits and discussion of treatment plans, ensure that trials are run effectively and safely in their research area.                                                                                                       | Strongly Agree (7) | 80.00%               |
| 6.18                                                                     | Effective practice is demonstrated by dedicated staff who are willing to go above and beyond to recruit and support patients in clinical trials. Caring and skilled research professionals who treat patients as individuals and not just as a recruitment figure are appreciated by patients who value their support, and continue on the trial for follow-up visits and are less likely to withdraw from studies. | Strongly Agree (7) | 80.00%               |
| 6.21                                                                     | The provision of dedicated teams and specialists for specific cancer disease areas/sites within trial units enhances research delivery and staff knowledge in their speciality, in contrast to stretching resources across multiple specialisms.                                                                                                                                                                    | Strongly Agree (7) | 80.00%               |

| Table 10 Q7 Additional Delphi Considerations - Consensus Statements |                                                                                                                                                        |  | Median             | Consensus<br>% Level |
|---------------------------------------------------------------------|--------------------------------------------------------------------------------------------------------------------------------------------------------|--|--------------------|----------------------|
| 7.3                                                                 | Supporting the primary end points of clinical trials should be the main goal of the NIHR and follow-up should be appropriately funded to achieve this. |  | Strongly Agree (7) | 72.00%               |

## DISCUSSION

### Overview of main findings

The Delphi's primary aim was to evaluate cancer clinical research delivery with a focus on patient follow-up and complexity from a multi-disciplinary perspective. The study provides in-depth insights of professionals working at the forefront of cancer clinical trial delivery, identifying priorities, concerns and indicators of research complexities. Consensus

and priority factors developed by expert panellists illustrate tensions and pressures within the profession. The main findings are discussed in relation to the key objectives across the eight inter-related survey categories with cross-over themes.

| Table 11 Trial Rating Indicators (TRIs) Priority Rankings |      |                                                                                                                                                                                                                  |            |        |
|-----------------------------------------------------------|------|------------------------------------------------------------------------------------------------------------------------------------------------------------------------------------------------------------------|------------|--------|
| Rank                                                      | Q    | TRI Category. 1 (Lowest Priority) - 7 (Highest Priority)                                                                                                                                                         | Priority % | Median |
|                                                           | No   |                                                                                                                                                                                                                  |            |        |
| 1                                                         | 8.2  | Protocol Procedures - Treatments, interventions, tests, samples and their volumes, frequencies and timelines.                                                                                                    | 72.00%     | 7      |
| 2                                                         | 8.1  | Resource Demands - Feasibility and personnel impact.                                                                                                                                                             | 72.00%     | 7      |
| 3                                                         | 8.7  | Investigational Treatment Complexity - Drug administration, novel therapy/drug, toxicity & risk, treatment windows and timelines.                                                                                | 64.00%     | 7      |
| 4                                                         | 8.5  | Follow-up and Visit Requirements - Type, frequency and duration.                                                                                                                                                 | 60.00%     | 7      |
| 5                                                         | 8.3  | Data Management, Administration & Monitoring - Sponsor defined requirements.                                                                                                                                     | 48.00%     | 6.5    |
| 6                                                         | 8.4  | Support Department Involvement & Outsourcing - Support services (Trust/external), e.g. RECIST reporting, QA procedures, specialist skills, facilities, equipment, central review or sub-contracted requirements. | 48.00%     | 6      |
| 7                                                         | 8.8  | Clinical Efficacy & Safety - Clinical pharmacology and pharmacokinetics requirements.                                                                                                                            | 44.00%     | 6      |
| 8                                                         | 8.11 | Patient Management - patient monitoring, safety, reporting or complex patient pathways.                                                                                                                          | 44.00%     | 6      |
| 9                                                         | 8.12 | Patient Selection - Patient identification, screening, eligibility criteria and consent process.                                                                                                                 | 36.00%     | 6      |
| 10                                                        | 8.6  | Cancer Disease Complexity, Patient Population and Health Status.                                                                                                                                                 | 32.00%     | 6      |
| 11                                                        | 8.13 | Trial Phase and Design - Randomisation process, multiple treatment arms, blinding, study phase.                                                                                                                  | 28.00%     | 6      |
| 12                                                        | 8.10 | Recruitment Potential - Recruitment feasibility and target potential by disease and study type.                                                                                                                  | 24.00%     | 6      |
| 13                                                        | 8.14 | Technology & Training - Sponsor defined requirements for study.                                                                                                                                                  | 24.00%     | 6      |
| 14                                                        | 8.9  | Protocol Variations - Protocol amendments, study extensions and ancillary/sub studies.                                                                                                                           | 16.00%     | 6      |

### Evaluating follow-up and complexity

*Follow-Up Definition:* Patient follow-up in cancer clinical trials is a key factor affecting capacity to deliver research, requiring an ostensive definition to ensure support models for its effective management develop from a clarified and equitable stance. The meaning participants attached to follow-up varied significantly which has implications for operational review. Implementation of a funding model acknowledging resource implications in patient follow-up management reached consensus as a strategic priority. Panellists strongly agreed that managing follow-up was a key factor affecting capacity, calling for recognition of the challenges faced and intimating the NIHR recruitment focused delivery model does not support follow-up. The group expressed a view that follow-up data is essential to successful trial outcomes but felt under

pressure to open new studies to gain accruals, with a detrimental effect on their ability to support existing patients.

*Barriers and Burdens:* A common thread running through statements on barriers and burdens within research was an expression of sites being under pressure, with perceptions of high expectations and demands placed on staff whilst faced with reduced resources. Communication issues, both internally and externally, were a common theme and perceived as a barrier to effective research. Concerns also related to sponsor documentation and inadequacy of information to accurately assess capacity and capability, or determine the full impact of delivering a study, in terms of its associated workloads and administrative burden. High levels of agreement between panellists indicated a sense of feeling unsupported, indicating

1  
2 Principal Investigator oversight and involvement can be  
3 lacking at times, recommending a clear understanding of roles,  
4 responsibilities and accurate assessment of workloads.

5 *Analysis of Complexity:* In addition to incremental  
6 interventions, tests and procedures within evolving study  
7 designs, the panel highlighted factors relating to the nature of  
8 cancer as a complex disease. Wide-ranging sub-types and  
9 niche patient populations combined with variations in health  
10 status and support needs of patients add to research  
11 complexity. Whilst trial phase is a recognised contributor to  
12 complexity, participants frequently cited short timelines and  
13 visit windows for protocol procedures as being problematic,  
14 particularly in terms of aligning sponsor requirements to site  
15 capacity, treatment pathways and the coordination of  
16 procedures, multi-disciplinary teams and support services.

17 *Factors Affecting Capacity:* Strong consensus existed  
18 between research professionals with regard to capacity factors.  
19 Inadequacies in staffing levels, funding, resources and  
20 facilities featured alongside constraints relating to overly  
21 complicated protocols designed without due consideration for  
22 practicalities of research delivery. Frequent amendments to  
23 trials also affected ongoing capacity reflecting uncertainty  
24 within research delivery which cannot always be predicted at  
25 site feasibility.

26 *Strategic Priorities:* Participants strongly agreed on strategic  
27 priorities relating to culture, education and collaborative  
28 relationships, all social aspects of research delivery. A patient-  
29 focussed priority reached an 88% consensus on the  
30 requirement to develop biomarkers for prediction of suitability  
31 and response to treatment and early diagnosis. The panel came  
32 to the same level of consensus in respect of national and  
33 organisational recognition of the challenges faced by  
34 professionals and sites. A group perspective illustrated the  
35 need for local and national leaders to develop greater  
36 understanding of the “constraints, resource and capacity issues  
37 and the priorities for research delivery and funding in the  
38 NHS”. The high levels of consensus relating to environment,  
39 culture, education, resources and investment delineates the  
40 needs of a profession within an evolving healthcare system,  
41 providing a strong focus for the NIHR and policymakers and  
42 impetus for further dialogue and review.

43 *Effective Research Practice:* Themes of open  
44 communication, staff commitment and dedication, well-  
45 trained and informed staff and strong collaborative teamwork  
46 all achieved high levels of consensus between the Delphi  
47 panellists. These skill sets within the profession allow sites and  
48 research staff to share best practices, retain staff and contribute  
49 to efficient trial delivery despite current challenges and  
50 resource limitations.

51 *Additional Delphi Considerations:* The one statement  
52 achieving consensus in this category called for appropriate  
53 follow-up funding to support the primary endpoints of clinical  
54 trials.

*Trial Rating & Complexity Assessment Tool (TRACAT):* A  
key outcome of the study is the ranking of trial rating indicators  
(TRIs) to develop TRACAT, a system based tool facilitating  
the accurate mapping and monitoring of factors determining  
study intensity, workload and resource impact on trial centres.  
The trial complexity rating will be applied to studies to support  
sites in feasibility assessment and map any changes to  
workloads or complexity during study lifecycles. Key  
stakeholder knowledge is vital in developing operational  
evaluation models and panellists had an important study role  
in prioritising and ranking TRIs and recommending additional  
factors for consideration. Through the assignment of a trial  
rating and complexity score linked to monitoring of  
interventions, visits, follow-up and patient volumes TRACAT  
provides workload and capacity analysis at individual, site,  
regional and national levels. The aim is to create an objective  
trial rating and portfolio management tool capable of  
integrating with existing data systems, to monitor real-time  
activity linked to complexity, increasing the value and  
structure of data for strategic and operational decision-making.  
Enhanced knowledge of trial complexity and acuity will  
support forecasting and capacity planning to optimise resource  
allocation in line with research objectives and patient needs.

*Strategic opportunities for clinical research delivery:* The  
study identified shortfalls at local and national levels, relating  
to effective communication and shared comprehension of  
needs and priorities for research, which provide an immediate  
opportunity for service improvements through better  
engagement across networks, organisations and disciplines.  
Strategic opportunities exist for Trusts, local research  
networks, the NIHR and NHS to work collaboratively to  
develop specialist services and support models, built on shared  
understanding and structured operational evaluation, to  
increase patient “accessibility, choice and participation in  
clinical trials.” To improve research quality and safety it is  
essential healthcare providers promote open and honest  
cultures focusing on improvement.<sup>32</sup> Professionals and  
organisations alike need to embrace dialectic approaches  
where mutual respect, innovation and communication can  
thrive. Iterative dialogue with research professionals to  
understand critical values and perceptions, relevant to local  
contexts, is vital in identifying effective strategic models and  
measures to improve operational delivery.<sup>33</sup> There is no  
national workforce planning for research delivery and NHS  
global activities for workforce modelling are fragmented.<sup>34</sup> As  
research advances and organisations grow, they face increasing  
challenges and complexities. Dynamic, fluctuating and  
evolving environments call for greater understanding of  
context-specific challenges. This study highlights the current  
realities of research delivery, emphasizing the importance of  
dialogue and shared decision-making in developing effective  
strategies and common goals, respecting mutual  
understanding.



1  
2 *Evaluating research delivery and performance:* Analysing  
3 and measuring performance and quality in evolving  
4 professions and organisations is challenging. Richardson et  
5 al.<sup>17</sup> argue that an organisation's measurement of information  
6 decreases in value as they grow and face greater complexity.  
7 Evaluation of operational performance and monitoring of  
8 success needs to take into account not only objective measures  
9 but also understand and value qualitative evidence to indicate  
10 progress or success, especially where complexity of  
11 operational elements is a dominant characteristic. Regular  
12 evaluative research of the state and nature of the clinical  
13 research delivery industry in the UK should be an ethical  
14 requirement of the NHS, NIHR and their partners. There is a  
15 moral obligation for researchers to ensure that the work they  
16 undertake and the resource allocated to perform these activities  
17 provides value, efficiency in service and participant benefit.

18  
19  
20 *Singerian Inquiry in operational review:* An effective  
21 evaluation of trial delivery requires a systems approach  
22 engaging multi-disciplinary professionals from a wide range of  
23 geographical locations, networks and trusts in a collective  
24 critique covering multiple realms. Collaborative research  
25 cultures supporting enhanced data structuring and synthesis  
26 can "significantly shorten the time gap between clinical  
27 research results to better clinical care decisions."<sup>35</sup> The  
28 nuances and complexities of cancer research delivery  
29 necessitated a study design involving a critical analysis of  
30 strategies, processes and technologies through a collation and  
31 synthesis of prismatic perspectives and experiential data. This  
32 study supports a systems-based approach to developing  
33 effective research capacity planning and performs an ethical  
34 role in the review of current NHS research delivery with the  
35 intent of improving performance and patient experience. An  
36 adaptive NHS research delivery framework capable of  
37 analyzing and monitoring research capacity and operational  
38 models in real-time and over time would enhance knowledge  
39 and support strategic planning. This study contributes in-depth  
40 qualitative review into operational aspects of clinical trials by  
41 engaging key stakeholders in defining variables relating to  
42 service pressures as well as highlighting best practices.

43  
44  
45 *Relation to existing research:* Our findings support the  
46 existing body of research documenting increasing pressures on  
47 sites linked to protocol complexity. Growing patient  
48 populations, bespoke therapies and extended follow-up pose  
49 challenges for existing NHS strategies with resources and  
50 research professionals under increasing pressure. The ability to  
51 grow research capacity is limited in systems where  
52 performance measures do not adequately assess complexity  
53 and context or support "tailored research capacity-building  
54 interventions".<sup>33</sup> Clinical research operational delivery exists  
55 within a complex adaptive system faced with growing  
56 challenges, one that Britnall argues 'requires us to think, work  
57 and collaborate in different ways'.<sup>34</sup> Outdated, hierarchical  
58 management styles<sup>36</sup> and cognitive dissonance are fueling a

healthcare staffing crisis and stifling innovation through its  
alienation of experienced, knowledgeable and creative  
professionals. Britnall discusses the following four key  
domains where improvement and investment enhances  
productivity: workforce health and well-being, skills  
development, technological efficiencies and effective  
innovation.<sup>34</sup> Findings of our study reinforce the need for  
strategic focus in these domains.

### Strengths and limitations

A strength of the study is the holistic, dialectical, consensus-based design which is as far as we are aware the first use of a Singerian Delphi in cancer research evaluation. Qualitative aspects of the design provided in-depth grounded knowledge through the 'voices' of clinical trial professionals, articulating human & social aspects of research delivery. The study also developed consensus-defined trial rating and complexity indicators (TRIs) to support objective analysis of cancer research delivery, adaptable to other therapeutic areas and global settings.

Given the exploratory nature of the study in developing a Singerian focused qualitative Delphi the resulting data sets were lengthy and expressive. The causal relationships within the data sets were not fully analysed during the implementation of the Delphi study. The EFACCT Delphi findings contribute to the development of Grounded Theory as part of a wider national project being conducted by the research team. This democratic study developed new knowledge in defining areas of importance to research delivery stakeholders and forms part of an iterative research program to evaluate and support operational delivery, focusing on follow-up and complexity.

Participants were limited to patient-facing professionals delivering studies at NHS sites in Scotland and England and did not include representatives from the Clinical Research Network (CRN). The results reflect the perspectives of professionals conducting the delivery elements of cancer research at trial sites. This does provide a strong understanding of the priorities in a clinical setting but enhanced knowledge covering the full gamut of roles within the industry is required. This Delphi forms part of a programme of study with future research planned involving a wider demographic to include sponsors, funders, networks and policymakers.

### Implications for practice

The results point to operational fragmentation and organisational disconnect with conflicting priorities limiting the ability of the profession to manage growing complexities and pressures. The evidence suggests that the current operating model is not sustainable for NHS sites. Statements achieving the highest level of consensus between Delphi panellists outlined growing protocol and procedural burden, calling on the NIHR to acknowledge increased complexities in cancer clinical trials and associated pressures for sites. High levels of consensus relating to operational challenges in research are



relevant to wider global settings and the concepts should be tested in other therapeutic areas. Additional recommendations included the requirement for a nationally agreed definition of follow-up and an effective, consistently validated funding and support model.

The research design considered the suitability of the Singerian approach within the Delphi method in relation to answering the main research question. A Singerian Delphi can serve multiple purposes and answer complex and broad questions in a single study. Our approach demonstrates a pragmatic application of the Singerian Delphi through an engagement with multiple perspectives to develop collaborative knowledge<sup>37</sup> and a recognition of diversity and complexity in understanding separate realities. Retrospectively, based on the resultant data and reflection, the Singerian approach has emerged as a potential theoretical lens to apply in future research investigating operational management within healthcare organisations.

## CONCLUSIONS

Cancer clinical research delivery forms part of a complex system which is in perpetual flux and ill-suited to linear, determinate operational models and processes. Disease, humans and operational networks, all complex in their own respect, continually transpose, synthesise and evolve, requiring a prismatic perspective and adaptive, systems-thinking approach to comprehend and to design effective, sustainable, human-centred research delivery solutions.

In summary, our findings indicate that in order to support patient access to clinical trials, meet national research ambitions and keep pace with scientific advances in cancer research, a delivery model cognisant of complex and diverse contextual challenges is required. To deliver quality research the holistic needs of patients and professionals alike need supporting. Further research into operational efficacy should consider the testing of dialectic models based on the Singerian approach. Whilst the study applied the Singerian approach as a Delphi methodology, it has emerged as a highly appropriate approach to understand and manage the dynamic and evolving field of cancer clinical research as a whole.

**Author affiliations** <sup>1</sup>Lincoln Institute for Health, University of Lincoln, UK <sup>2</sup>Lincolnshire Clinical Research Facility, United Lincolnshire Hospitals Trust, Lincoln, UK <sup>3</sup>Community Health Research Unit, University of Lincoln, UK <sup>4</sup>School of Psychology, University of Bedfordshire, Luton, UK <sup>5</sup>South East Scottish Cancer Research Network (SESCRN), Edinburgh, Scotland, UK

**Acknowledgments** The authors wish to acknowledge the invaluable contribution of Principal Investigators and staff at; United Lincolnshire Hospitals Trust, Edinburgh Cancer Centre, Dumfries & Galloway Royal Infirmary, Clatterbridge Cancer Centre, University College London Hospitals NHS

Foundation Trust, Royal Devon & Exeter NHS Foundation Trust, Harrogate & District NHS Foundation Trust, Derby Teaching Hospitals NHS Foundation Trust, University Hospitals Coventry & Warwickshire, Aintree University Hospitals NHS Foundation Trust, Lancashire Teaching Hospital NHS Foundation Trust, North Bristol NHS Trust, Poole Hospital NHS Foundation Trust.

**Author contributions** HMJ was responsible for the study design, data acquisition and analysis and led on manuscript preparation. FC contributed to manuscript preparation, review and revision. GL provided statistical review. FC, GL, CB and TA were responsible for academic and intellectual review of the study design, protocol and manuscript. DB has provided clinical oversight. All authors have read and reviewed the final manuscript.

**Transparency declaration** The lead author\* affirms that this manuscript is an honest, accurate, and transparent account of the study being reported; that no important aspects of the study have been omitted and that any discrepancies from the study as planned (and, if relevant, registered) have been explained. \*The manuscript's guarantor.

**Funding** United Lincolnshire Hospitals NHS Trust (through cancer charitable funds) and the University of Lincoln funded a PhD studentship leading to the study. University of Lincoln as sponsor provided academic and research governance direction.

**Competing interests** None declared.

**Patient consent for publication** Not required.

**Ethical Approval** The study was approved by the East Midlands – Derby Research Ethics Committee (REC reference: 17/EM/0292) and the University of Lincoln School of Health and Social Care Ethics Committee. All participants taking part in the Delphi study provided informed consent.

**Provenance and peer review** Not commissioned; externally peer reviewed.

**Data sharing** Anonymised data will be available on request from the corresponding author.

**Open access** This is an open access article distributed in accordance with the Creative Commons Attribution Non Commercial (CC BY-NC 4.0) license, which permits others to distribute, remix, adapt, build upon this work non-commercially, and license their derivative works on different terms, provided the original work is properly cited and the use is non-commercial. See: <http://creativecommons.org/licenses/by-nc/4.0>.

<http://creativecommons.org/licenses/by-nc/4.0>

## REFERENCES

1. Downing A, Morris EJ, Corrigan N, et al. High hospital research participation and improved colorectal cancer survival outcomes: a population-based study. *Gut* 2017;66:89-96.
2. NHS England. Improving Outcomes through Personalised Medicine. (2016). [Accessed 16 June 2019]. Available from: <https://www.england.nhs.uk/wp-content/uploads/2016/09/improving-outcomes-personalised-medicine.pdf>
3. NHS. The NHS Long Term Plan. 2019. Available from: <https://www.longtermplan.nhs.uk/online-version/> [Accessed 12 Aug 2019].
4. Bray F, Ferlay J, Soerjomataram I, et al. Global cancer statistics 2018: GLOBOCAN estimates of incidence and mortality worldwide for 36 cancers in 185 countries. *CA Cancer J Clin*. 2018;68:394-424. [Accessed 12 Aug 2019]. Available from: <https://onlinelibrary.wiley.com/doi/epdf/10.3322/caac.21492>
5. Malik L, Lu D. Increasing complexity in oncology phase I clinical trials. *Invest New Drugs* 2019;37:519. [Accessed 21 Aug 2019]. Available from: <https://doi.org/10.1007/s10637-018-0699-1>
6. National Cancer Policy Forum. Policy Issues in the Clinical Development and Use of Immunotherapy for Cancer Treatment: Proceedings of a Workshop. *National Academies Press* (US) 2016. [Accessed 01 Aug 2019]. Available from: <https://www.ncbi.nlm.nih.gov/books/NBK396430/>
7. Gilbert MR, Rubinstein L, Lesser G. Creating clinical trial designs that incorporate clinical outcome assessments. *Neuro Oncol*. 2016;18(2):ii21-ii25. [Accessed 01 Aug 2019] Available from: <https://doi.org/10.1093/neuonc/nov254>
8. Stewart BW, Wild CP. World cancer report 2014. *IARC Publications* 2014. [Accessed 12 Jul 2019]. Available from: <https://publications.iarc.fr/Non-Series-Publications/World-Cancer-Reports/World-Cancer-Report-2014>
9. Janiaud P, Serghiou S, Ionnidis J, et al. New clinical trial designs in the era of precision medicine: An overview of definitions, strengths, weaknesses, and current use in oncology. *Cancer Treatment Reviews* 2019;73:20 - 30
10. Getz KA, Kenneth K. Open innovation: the new face of pharmaceutical research and development. *Expert Rev Clin Pharmacol*. 2012;5(5):481-483. [Accessed 21 Jul 2019]. Available from: <https://doi.org/10.1586/ecp.12.44>
11. Lyddiard J, Briggs J, Berridge J, Coffey M. A workload measurement. *Appl Clin Trials*. 2010. [Accessed 12 Jul 2019] Available from: <http://www.appliedclinicaltrials.com/workload-measurement>
12. Briggs J, Lyddiard J, Coffey M, et al. When to say 'Yes' in the NHS: Development of a Complexity Scoring System & Management Tool. *CR Focus* 2011;22(1)19-22.
13. Batchelor J. The Assumptions of Data Capture. *Journal for Clinical Studies* 2017;9(3):46-47.
14. Alderwick H, Dixon J. The NHS long term plan. *BMJ* 2019;364:184. [Accessed 05 Aug 2019]. Available from: <https://doi.org/10.1136/bmj.l84>.
15. Paquet G, Ragan T. Through the Detox Prism: Exploring Organisational Failures and Design Responses. Ottawa: Invenire Books; 2012:119-123.
16. Vaughn VM, Saint S, Krein SL, et al. Characteristics of healthcare organisations struggling to improve quality: results from a systematic review of qualitative studies. *BMJ Qual Saf*. 2019;28:74-84.
17. Richardson S, Courtney J, Paradise D. An Assessment of the Singerian Inquiring Organizational Model: Cases from Academia and the Utility Industry. *Inf Syst Front*. 2001;3(1):49-62. [Accessed Jul 19 2019]. Available from: <https://link.springer.com/article/10.1023%2FA%3A1011449620792>
18. Haynes JD. Internet Management Issues: A Global Perspective. London: IGI Global 2012;167-169.
19. Paul D. (2006) Addressing Complex Decision Problems in Distributed Environments. In: van Gigch J.P. (eds) Wisdom, Knowledge, and Management. C.West Churchman and Related Works Series, vol 2. Springer, New York, NY;2006:85-86.
20. Akins RB, Tolson H, Cole BR. Stability of response characteristics of a Delphi panel: application of bootstrap data expansion. *BMC Med Res Methodol*. 2005;5:37. [Accessed 14 Dec 2018.] Available from: <http://doi.org/10.1186/1471-2288-5-37>
21. Kennedy HP. Enhancing Delphi research: methods and results. *J Adv Nurs*. 2004;45(5):504-511.
22. Critcher C, Gladstone B. Utilizing the Delphi Technique in Policy Discussion: A Case Study of a Privatised Utility in Britain. *Public Administration*. 1998; 76:31-449.
23. Linstone HA, Turoff M. Editors. The Delphi method: Techniques and applications. Newark, NJ: New Jersey Institute of Technology. 2002:167-169. [Accessed 11 Sep.18] Available from <https://web.njit.edu/~turoff/pubs/delphibook.pdf>.
24. Courtney J, Merali Y, Paradise D, Wynn E. On the Study of Complexity in Information Systems. *IJITSA 1.1*. 2008: 37-48.
25. Mozuni M, Jonas W. An Introduction to the Morphological Delphi Method for Design: A Tool for Future-Oriented Design Research, *She Ji: The Journal of Design, Economics, and Innovation*. 2017; 3(4):303-318, [Accessed 14 August 2019] Available from: <https://doi.org/10.1016/j.sheji.2018.02.004>.
26. Mitroff I, Williams J, Rathswohl. Dialectical inquiring systems: A new methodology for information science. *The Journal of the Association for Information Science and Technology*. 1972; 23(6):365-378. [Accessed 05 Aug

- 1  
2 2019]. Available from: <https://doi.org/10.1002/asi.4630230606>  
3 4630230606  
4 27. Saukko, P. Doing Research in Cultural Studies: An  
5 introduction to classical and new methodological  
6 approaches. London: SAGE Publications; 2003:25-27.  
7 28. Keeney S, McKenna H, Hasson F. The Delphi Technique  
8 in Nursing and Health Research. First Edition. Oxford,  
9 UK: Wiley; 2011:53.  
10 29. Hsu C., Sandford BA. The Delphi Technique: Making  
11 Sense of Consensus. *Practical Assessment Research &*  
12 *Evaluation*. 2007; 12(10):1-8. [Accessed 12 Sep 2018].  
13 Available from: <https://pareonline.net/pdf/v12n10.pdf>  
14 30. Keeney S, Hasson F, McKenna H. A critical review of the  
15 Delphi technique as a research methodology for nursing.  
16 *Int J Nurs Stud*. 2001;38; 195-200.  
17 31. Vernon, W. The Delphi technique: A review. *Int J Ther*  
18 *Rehabil*. 2009;16(2); 69-76.  
19 32. HRA. UK Policy Framework for Health and Social Care  
20 Research v3.3. 2017:28. [Accessed 12 Aug 2019]. HRA.  
21 London. Available from: [https://www.hra.nhs.uk/planning](https://www.hra.nhs.uk/planning-and-improving-research)  
22 [-and-improving-research](https://www.hra.nhs.uk/planning-and-improving-research)  
23 33. Edwards N, Kaseje D, Kahwa E. Editors. Building and  
24 Evaluating Research Capacity in Healthcare Systems:  
25 *Case Studies and Innovative Models*. Cape Town: UCT  
26 Press: 2016:31.  
27 34. Britnell, M. Human: Solving the Global Workforce Crisis  
28 in Healthcare. London: Oxford University Press: 2019.  
29 35. Batchelor J. Strength through Collaboration. *Int Clin*  
30 *Trials* 2017;9:24-26.  
31 36. West, M. The NHS crisis of caring for staff: what do we  
32 need to do? Kings Fund 2019. [Accessed 06 Sep 2019].  
33 Available from: [https://www.kingsfund.org.uk/blog/2019](https://www.kingsfund.org.uk/blog/2019/03/nhs-crisis-caring)  
34 [/03/nhs-crisis-caring](https://www.kingsfund.org.uk/blog/2019/03/nhs-crisis-caring)  
35 37. Greenhalgh T, Jackson C, Shaw S, Janamian T.  
36 Achieving Research Impact Through Co-creation in  
37 Community-Based Health Services: Literature Review  
38 and Case Study. *Milbank Q*. 2016 Jun;94(2):392-429.  
39 doi: 10.1111/1468-0009.12197  
40  
41  
42  
43  
44  
45  
46  
47  
48  
49  
50  
51  
52  
53  
54  
55  
56  
57  
58  
59  
60

## Supplement 1 - EFACCT research professional study consensus statements

| Q1   | Follow-up Definition                                                                                                                                                                                                                                                                                                                                                                                                                                                                                                                                                                                                                                                                                                                                                                                                                                                                                                                                                           | Median             | Consensus % Level |
|------|--------------------------------------------------------------------------------------------------------------------------------------------------------------------------------------------------------------------------------------------------------------------------------------------------------------------------------------------------------------------------------------------------------------------------------------------------------------------------------------------------------------------------------------------------------------------------------------------------------------------------------------------------------------------------------------------------------------------------------------------------------------------------------------------------------------------------------------------------------------------------------------------------------------------------------------------------------------------------------|--------------------|-------------------|
| 1.4  | NIHR/Nationally Agreed Definition of Follow -Up: A nationally agreed definition of the term 'follow-up' and/or types of 'follow-up' in relation to research delivery in the NHS should be published by the NIHR so that all clinical research professionals, allied professions and associated bodies conform to a standard terminology and parameters.                                                                                                                                                                                                                                                                                                                                                                                                                                                                                                                                                                                                                        | Strongly Agree (7) | 92%               |
| Q2   | Barriers & Burdens                                                                                                                                                                                                                                                                                                                                                                                                                                                                                                                                                                                                                                                                                                                                                                                                                                                                                                                                                             | Median             | Consensus % Level |
| 2.19 | Trial sites are under constant pressure to open trials with expectations to recruit high numbers of trial participants to increasingly complex and higher intensity trials treating patients with rare cancers whilst being faced with reduced resources. Budgetary constraints and outdated payment terms which do not accurately reflect the requirements, time and effort of sites, represent a high risk to NHS organisations where audited and reduce the capacity to maintain effective trial delivery and meet patient needs through inadequate staffing levels. The NIHR needs to acknowledge the increased complexity of cancer trials, the workload impact in co-ordination and management, augmented lab work & data management demands and comprehend the nature of academic and commercial trials and their associated pressures on research delivery sites and staff through the development of an effective and consistently validated funding & support model. | Strongly Agree (7) | 92%               |
| 2.35 | The management of patient follow-up in cancer studies is a key factor affecting site capacity and ability to implement, recruit to and deliver effective research. Follow-up visits for cancer patients and research studies can continue for many years and often until death. Patients may also transfer from other hospitals for follow-up care, which has an impact on the research staff and capacity at site. Follow-up data is essential to the outcomes of research studies but the NIHR research delivery model focuses on and supports recruitment but not follow-up activities. With continual pressure to open studies to gain accruals the ability of teams to manage existing numbers of patients in follow-up is compromised leading to missed timelines, patient visits and missing data, which could be extremely detrimental to follow-up studies and invalidate results of the trial. These burdens and issues are not recognised within research delivery. | Strongly Agree (7) | 88.00%            |
| 2.13 | Principal Investigator oversight and involvement is lacking at times in certain tumour sites, studies or hospital locations, particularly for multi-site trusts where the PI works from one centre, leaving Research Nurses feeling unsupported. When new studies are set up it is important to ensure there is a clear understanding of roles and responsibilities of the research team so that workloads can be accurately assessed. Principal Investigators should be aware that they could delegate tasks according to GCP but retain overall responsibility for the study beyond the treatment elements and need to maintain involvement in patient follow-up and review.                                                                                                                                                                                                                                                                                                 | Strongly Agree (7) | 88.00%            |
| 2.4  | Support and retention of research professionals, nurses and specialist roles as well as the provision of sufficiently skilled resource should be the focus of the NIHR and Trusts to ensure safe and efficient research environments and reduce excessive workloads. Staff turnover, changes, sickness and absence all have a significant impact on research implementation and delivery at sites.                                                                                                                                                                                                                                                                                                                                                                                                                                                                                                                                                                             | Strongly Agree (7) | 84.00%            |
| 2.23 | Protocols and study documentation supplied to assess capacity and capability do not show the impact of eCRFs or the full extent of information and demographic data required. High data demands and the management of sponsor data queries are a significant and time-consuming administrative burden for sites. Difficulties in communication or slow responses can lead to extended or additional work for sites especially where a sponsor's representative does not comprehend the problems in obtaining retrospective information or understand the nature of certain data issues.                                                                                                                                                                                                                                                                                                                                                                                        | Strongly Agree (7) | 84.00%            |
| 2.22 | Clinical Research Organisations tend to outsource a lot of work which adds to a site's administrative burden and complexity in having to deal with multiple supplier IT platforms and electronic data capture systems (e.g. RTSM, EDC, eCRFs, ePRO & eQoL), all with different user logins and interfaces. The complexities of some systems can require significant time to train which is difficult to include into the busy schedules of teams and represents a further burden to sites.                                                                                                                                                                                                                                                                                                                                                                                                                                                                                     | Strongly Agree (7) | 84.00%            |
| 2.29 | Protocol defined timelines within some trials can be difficult for sites to achieve. Requirements for additional tests at trial entry or specific time points, such as CT scans, ECHOs, ECGs, can be challenging to co-ordinate due to resource issues, limited appointment availability or the length of time taken to receive some results e.g. blood results from pathology or slow reporting of scans from the imaging team.                                                                                                                                                                                                                                                                                                                                                                                                                                                                                                                                               | Strongly Agree (7) | 84.00%            |
| 2.11 | Lack of organisational support to promote and raise the profile of clinical research impacts delivery at multiple levels. Patients may not be aware of the trials running within the organisation limiting their ability to participate or Trust staff/allied clinical professionals who are not research active may be resistant to getting involved or have limited capacity. If research is not part of everyday care and isn't promoted at a Trust, it can be deemed as being an additional element, not a routine choice or less important than other aspects of patient care. Trusts should support the involvement of all staff in research through providing training and/or incentives, in order to change perceptions, raise awareness, increase capacity and enhance collaboration between departments for the benefit of patients and the whole organisation.                                                                                                      | Strongly Agree (7) | 84.00%            |



|    |      |                                                                                                                                                                                                                                                                                                                                                                                                                                                                                                                                                                                                                                                                                                                                                                                                                                           |                    |        |
|----|------|-------------------------------------------------------------------------------------------------------------------------------------------------------------------------------------------------------------------------------------------------------------------------------------------------------------------------------------------------------------------------------------------------------------------------------------------------------------------------------------------------------------------------------------------------------------------------------------------------------------------------------------------------------------------------------------------------------------------------------------------------------------------------------------------------------------------------------------------|--------------------|--------|
| 1  | 2.36 | Protocol amendments can lead to a large additional workload for sites and unplanned resource and capacity burdens. Amendments are becoming increasingly frequent with significant paperwork and administration, sometimes involving only minor changes or lacking clarity on changes. Some sponsors can introduce an entirely new study element via an amendment, which can be hard for sites to decline. Data collection goals are being changed with additional data points added to forms and an expectation for sites to collect this data retrospectively, which is frustrating and time consuming for sites. The additional time to train all delegated staff is a huge problem in a large system and can redirect resource from patient care and treatment to manage the paperwork for amendments on existing trials.              | Strongly Agree (7) | 80.00% |
| 2  | 2.8  | The process of study set up and approval continues to be slow for multiple reasons, but both overall effectiveness of trial implementation and delivery is affected by insufficient resources for administration, data management and the capacity of Finance Business Partners or co-coordinators, compounded by increasing levels of paperwork and administrative burden.                                                                                                                                                                                                                                                                                                                                                                                                                                                               | Strongly Agree (7) | 80.00% |
| 3  | 2.12 | A lack of communication and collaboration between hospital departments, shared care organisations or clinical and non-clinical staff impacts effective research delivery with differing issues and priorities making treatments, interventions or training difficult to implement alongside a lack of understanding of the importance of clinical research, Good Clinical Practice and medical staff not having time to complete relevant training. Research teams can find negotiating time, interest and support of research challenging and exhausting when facing organisational resistance and negativity. When research is viewed in a negative way or is unsupported, it can be demoralising for teams and impede the skills development and confidence of new staff as well as being a significant barrier to efficient research. | Strongly Agree (7) | 80.00% |
| 4  | 2.32 | Clinical pharmacokinetic (PK) studies are becoming increasingly complex with lengthy PK sampling or collection times falling outside of current available clinic hours.                                                                                                                                                                                                                                                                                                                                                                                                                                                                                                                                                                                                                                                                   | Strongly Agree (7) | 80.00% |
| 5  | 2.30 | Cancer research studies can be incredibly complex to deliver with targeted treatments being developed for patients in rare disease groups. Protocol designs are being developed with increasingly high data demands and additional tests, providing supplementary information rather than focused data to answer the research question. The addition of baseline visits between screening and initial treatment visit, requirement for central tissue testing, supply of archival tissue or additional biopsies can be time consuming and challenging for sites to deliver and some sites have limited ability to provide accurate RECIST reporting within the clinical trial timelines.                                                                                                                                                  | Strongly Agree (7) | 80.00% |
| 6  | 2.3  | Due to a lack of research nurses and associated professionals too many trials are being managed by individual staff with research nurses often supporting more than one clinical area e.g. haematology & lung, and within those areas possibly recruiting to 15 or more studies. When managing a large number of studies it is very difficult to truly know all protocols well. Managing high study volumes is challenging particularly as trials are becoming more complex in nature, which limits the capacity of the research team to recruit and follow up patients.                                                                                                                                                                                                                                                                  | Strongly Agree (7) | 80.00% |
| 7  | 2.44 | The lack of IT integration in the NHS is a barrier to efficient trial delivery and data management due to stand alone IT systems, multiple incompatible databases, software providers and imaging systems requiring multiple log ins, and the need for data duplication, re-entry and cross checking causing additional workloads and data queries.                                                                                                                                                                                                                                                                                                                                                                                                                                                                                       | Strongly Agree (7) | 80.00% |
| 8  | 2.6  | Insufficient levels of adequately trained resources can lead to staff feeling pressured to take on additional tasks that do not normally come under their remit, especially in set up, and a lack of clarity or merging of roles and responsibilities places additional burdens on team members. Where there are gaps in certain roles, such as no CNS in a particular speciality, research nurses may feel they need to step in to support a patient, despite their own limited capacity. The full involvement of research nurses in study set up, to ensure accurate assessment of capacity and capability, is time consuming, slow and challenging when trying to balance their clinical commitments, patient follow-up and recruitment to existing studies.                                                                           | Strongly Agree (7) | 80.00% |
| 9  | 2.2  | Trusts believe they can run complex cancer studies but with NHS resources currently stretched and a lack of resource allocation from research networks the capacity to support and maintain effective cancer clinical trial delivery, ensuring patient safety and needs are met is being impacted. Limited infrastructure and staff shortages mean supporting departments such as wards, clinics, radiology, pathology, pharmacy and various medical specialities, are struggling to accommodate additional trial workloads in a timely fashion and too many trials are being managed by individual research staff. Research trial delivery is one of the first areas to be reduced or impacted where a Trust or a department, such as pharmacy, has capacity issues.                                                                     | Strongly Agree (7) | 80.00% |
| 10 | 2.1  | There is a lack of understanding across the NIHR, Sponsors, LCRN's, Trusts and senior management of the complexities and workload in conducting cancer research, for example complex haematology trials, which has led to unrealistic expectations and enormous pressures on research teams at NHS sites.                                                                                                                                                                                                                                                                                                                                                                                                                                                                                                                                 | Strongly Agree (7) | 80.00% |
| 11 | 2.28 | Niche trial designs with narrow inclusion and exclusion criteria or those with very short screening periods (7 days for some activities) can be challenging for sites in meeting the required timelines and a barrier to recruitment.                                                                                                                                                                                                                                                                                                                                                                                                                                                                                                                                                                                                     | Strongly Agree (7) | 76.00% |
| 12 | 2.41 | Difficulties exist due to limited space in clinics or lack of suitable rooms to offer patients the required privacy and sufficient time to explain trials in a comfortable environment without being disturbed, or to take their bloods and conduct other investigations as needed.                                                                                                                                                                                                                                                                                                                                                                                                                                                                                                                                                       | Strongly Agree (7) | 72.00% |



|    |           |                                                                                                                                                                                                                                                                                                                                                                                                                                                                                                                                                                                                                                                                                                                                                                                                                                                                                                                                                                                                                                                                                                          |                       |                          |
|----|-----------|----------------------------------------------------------------------------------------------------------------------------------------------------------------------------------------------------------------------------------------------------------------------------------------------------------------------------------------------------------------------------------------------------------------------------------------------------------------------------------------------------------------------------------------------------------------------------------------------------------------------------------------------------------------------------------------------------------------------------------------------------------------------------------------------------------------------------------------------------------------------------------------------------------------------------------------------------------------------------------------------------------------------------------------------------------------------------------------------------------|-----------------------|--------------------------|
| 1  | 2.27      | Barriers to effective trial delivery occur where protocols are not user friendly or have been badly written, where healthcare systems, research professionals or patients have not been consulted during the design stage. A lack of respect for the experiences and knowledge of research delivery staff and patients through failure to involve them in helping design better protocols, CRFs and other study documentation can lead to fundamental design issues, generate data queries, impact efficient trial delivery and add significant burdens for participating sites and patients.                                                                                                                                                                                                                                                                                                                                                                                                                                                                                                            | Strongly Agree<br>(7) | 72.00%                   |
| 2  | 3         |                                                                                                                                                                                                                                                                                                                                                                                                                                                                                                                                                                                                                                                                                                                                                                                                                                                                                                                                                                                                                                                                                                          |                       |                          |
| 3  | 4         |                                                                                                                                                                                                                                                                                                                                                                                                                                                                                                                                                                                                                                                                                                                                                                                                                                                                                                                                                                                                                                                                                                          |                       |                          |
| 4  | 5         |                                                                                                                                                                                                                                                                                                                                                                                                                                                                                                                                                                                                                                                                                                                                                                                                                                                                                                                                                                                                                                                                                                          |                       |                          |
| 5  | 6         |                                                                                                                                                                                                                                                                                                                                                                                                                                                                                                                                                                                                                                                                                                                                                                                                                                                                                                                                                                                                                                                                                                          |                       |                          |
| 6  | <b>Q3</b> | <b>Analysis of Complexity</b>                                                                                                                                                                                                                                                                                                                                                                                                                                                                                                                                                                                                                                                                                                                                                                                                                                                                                                                                                                                                                                                                            | <b>Median</b>         | <b>Consensus % Level</b> |
| 7  |           |                                                                                                                                                                                                                                                                                                                                                                                                                                                                                                                                                                                                                                                                                                                                                                                                                                                                                                                                                                                                                                                                                                          |                       |                          |
| 8  | 3.21      | Cancer clinical trial protocols have varying degrees of complexity but the burden of protocol procedures is growing which adds to the complexity of implementing and delivering studies, with incremental levels of training (e.g. 450 training slides on a 5 arm study with strict guidelines) and increased volumes of tests, questionnaires, visits, assessments and more detailed data requirements.                                                                                                                                                                                                                                                                                                                                                                                                                                                                                                                                                                                                                                                                                                 | Strongly Agree<br>(7) | 96.00%                   |
| 9  |           |                                                                                                                                                                                                                                                                                                                                                                                                                                                                                                                                                                                                                                                                                                                                                                                                                                                                                                                                                                                                                                                                                                          |                       |                          |
| 10 |           |                                                                                                                                                                                                                                                                                                                                                                                                                                                                                                                                                                                                                                                                                                                                                                                                                                                                                                                                                                                                                                                                                                          |                       |                          |
| 11 |           |                                                                                                                                                                                                                                                                                                                                                                                                                                                                                                                                                                                                                                                                                                                                                                                                                                                                                                                                                                                                                                                                                                          |                       |                          |
| 12 |           |                                                                                                                                                                                                                                                                                                                                                                                                                                                                                                                                                                                                                                                                                                                                                                                                                                                                                                                                                                                                                                                                                                          |                       |                          |
| 13 | 3.1       | Cancer is no longer one diagnosis but a complex range of conditions with many sub-groups. Cancer clinical research complexity is growing as trials now study a wide range of cancers, rare tumours, haematological malignancies and molecular sub-types with treatments becoming precise, targeted and having more options at each stage of the cancer journey. Trials may now only be suitable for a subgroup of the cancer population, such as lymphoma, which has more than 70 sub-types. Sites need to have a greater number of trials open to ensure patients have the opportunity to participate, but each trial will recruit a smaller number of patients adding to the complexity of delivering research.                                                                                                                                                                                                                                                                                                                                                                                        | Strongly Agree<br>(7) | 92.00%                   |
| 14 |           |                                                                                                                                                                                                                                                                                                                                                                                                                                                                                                                                                                                                                                                                                                                                                                                                                                                                                                                                                                                                                                                                                                          |                       |                          |
| 15 |           |                                                                                                                                                                                                                                                                                                                                                                                                                                                                                                                                                                                                                                                                                                                                                                                                                                                                                                                                                                                                                                                                                                          |                       |                          |
| 16 |           |                                                                                                                                                                                                                                                                                                                                                                                                                                                                                                                                                                                                                                                                                                                                                                                                                                                                                                                                                                                                                                                                                                          |                       |                          |
| 17 |           |                                                                                                                                                                                                                                                                                                                                                                                                                                                                                                                                                                                                                                                                                                                                                                                                                                                                                                                                                                                                                                                                                                          |                       |                          |
| 18 |           |                                                                                                                                                                                                                                                                                                                                                                                                                                                                                                                                                                                                                                                                                                                                                                                                                                                                                                                                                                                                                                                                                                          |                       |                          |
| 19 |           |                                                                                                                                                                                                                                                                                                                                                                                                                                                                                                                                                                                                                                                                                                                                                                                                                                                                                                                                                                                                                                                                                                          |                       |                          |
| 20 | 3.17      | Managing the communication and co-ordination of clinical trial appointments, procedures, and diagnostics, e.g. mammography, ECHO, ECGs, clip insertion, CT scans, bone marrow & surgical/specialist procedures is pressurised and complicated when liaising with multi-disciplinary teams and support services to meet protocol specific timeframes or treatment windows. Aligning a study with the two-week wait or fitting it into a surgical pathway isn't always possible due to operational problems and capacity issues.                                                                                                                                                                                                                                                                                                                                                                                                                                                                                                                                                                           | Strongly Agree<br>(7) | 88.00%                   |
| 21 |           |                                                                                                                                                                                                                                                                                                                                                                                                                                                                                                                                                                                                                                                                                                                                                                                                                                                                                                                                                                                                                                                                                                          |                       |                          |
| 22 |           |                                                                                                                                                                                                                                                                                                                                                                                                                                                                                                                                                                                                                                                                                                                                                                                                                                                                                                                                                                                                                                                                                                          |                       |                          |
| 23 |           |                                                                                                                                                                                                                                                                                                                                                                                                                                                                                                                                                                                                                                                                                                                                                                                                                                                                                                                                                                                                                                                                                                          |                       |                          |
| 24 |           |                                                                                                                                                                                                                                                                                                                                                                                                                                                                                                                                                                                                                                                                                                                                                                                                                                                                                                                                                                                                                                                                                                          |                       |                          |
| 25 |           |                                                                                                                                                                                                                                                                                                                                                                                                                                                                                                                                                                                                                                                                                                                                                                                                                                                                                                                                                                                                                                                                                                          |                       |                          |
| 26 | 3.6       | The clinical trial phase is a key determinant in study complexity with earlier phase studies typically more complex, requiring lots of visits, extra tests or PK analysis. Early phase clinical trials frequently need input from other departments e.g. ophthalmology or dermatology requiring collaboration to arrange time and appointments. Studies involving overnight stays can be hard to organise due to bed and resource capacity. Admitting patients for trial monitoring can be hard to justify and negotiate when beds are full. Later stage studies such as Phase 3 may include standard of care but complexity is added due to the larger volume of patients required and lengthy follow-up.                                                                                                                                                                                                                                                                                                                                                                                               | Strongly Agree<br>(7) | 88.00%                   |
| 27 |           |                                                                                                                                                                                                                                                                                                                                                                                                                                                                                                                                                                                                                                                                                                                                                                                                                                                                                                                                                                                                                                                                                                          |                       |                          |
| 28 |           |                                                                                                                                                                                                                                                                                                                                                                                                                                                                                                                                                                                                                                                                                                                                                                                                                                                                                                                                                                                                                                                                                                          |                       |                          |
| 29 |           |                                                                                                                                                                                                                                                                                                                                                                                                                                                                                                                                                                                                                                                                                                                                                                                                                                                                                                                                                                                                                                                                                                          |                       |                          |
| 30 |           |                                                                                                                                                                                                                                                                                                                                                                                                                                                                                                                                                                                                                                                                                                                                                                                                                                                                                                                                                                                                                                                                                                          |                       |                          |
| 31 |           |                                                                                                                                                                                                                                                                                                                                                                                                                                                                                                                                                                                                                                                                                                                                                                                                                                                                                                                                                                                                                                                                                                          |                       |                          |
| 32 |           |                                                                                                                                                                                                                                                                                                                                                                                                                                                                                                                                                                                                                                                                                                                                                                                                                                                                                                                                                                                                                                                                                                          |                       |                          |
| 33 | 3.16      | Protocol designs that involve short timelines and windows for procedures are more complex and logistically challenging for sites to deliver when trying to schedule registration, randomisation, assessments and treatment around the availability of NHS resources, especially where there is little flexibility from the sponsor. It can be difficult when a patient is excluded from a trial because of scan timings or initial bloods not having been taken by other clinicians who saw the patient first at diagnosis, but not as part of a trial. Additional complexities arise from late diagnostics where a patient comes to the centre late.                                                                                                                                                                                                                                                                                                                                                                                                                                                    | Strongly Agree<br>(7) | 80.00%                   |
| 34 |           |                                                                                                                                                                                                                                                                                                                                                                                                                                                                                                                                                                                                                                                                                                                                                                                                                                                                                                                                                                                                                                                                                                          |                       |                          |
| 35 |           |                                                                                                                                                                                                                                                                                                                                                                                                                                                                                                                                                                                                                                                                                                                                                                                                                                                                                                                                                                                                                                                                                                          |                       |                          |
| 36 |           |                                                                                                                                                                                                                                                                                                                                                                                                                                                                                                                                                                                                                                                                                                                                                                                                                                                                                                                                                                                                                                                                                                          |                       |                          |
| 37 |           |                                                                                                                                                                                                                                                                                                                                                                                                                                                                                                                                                                                                                                                                                                                                                                                                                                                                                                                                                                                                                                                                                                          |                       |                          |
| 38 |           |                                                                                                                                                                                                                                                                                                                                                                                                                                                                                                                                                                                                                                                                                                                                                                                                                                                                                                                                                                                                                                                                                                          |                       |                          |
| 39 | 3.33      | The management of Adverse Events, Serious Adverse Events and SUSARS can be time consuming in high risk trials or trials where there are a lot of these and can become complex if patients become very unwell. The cancer type, the nature of the patient population and how well they are will all significantly affect the complexity of the study and will affect the number of likely SAEs and amount of clinical input required.                                                                                                                                                                                                                                                                                                                                                                                                                                                                                                                                                                                                                                                                     | Strongly Agree<br>(7) | 80.00%                   |
| 40 |           |                                                                                                                                                                                                                                                                                                                                                                                                                                                                                                                                                                                                                                                                                                                                                                                                                                                                                                                                                                                                                                                                                                          |                       |                          |
| 41 |           |                                                                                                                                                                                                                                                                                                                                                                                                                                                                                                                                                                                                                                                                                                                                                                                                                                                                                                                                                                                                                                                                                                          |                       |                          |
| 42 |           |                                                                                                                                                                                                                                                                                                                                                                                                                                                                                                                                                                                                                                                                                                                                                                                                                                                                                                                                                                                                                                                                                                          |                       |                          |
| 43 |           |                                                                                                                                                                                                                                                                                                                                                                                                                                                                                                                                                                                                                                                                                                                                                                                                                                                                                                                                                                                                                                                                                                          |                       |                          |
| 44 | 3.25      | Cancer clinical trial protocols are subject to more amendments than other specialities and are increasing in volume with complex studies having higher rates of amendments. These add to the complexity of delivering research, especially where there a multi-themed amendments, are perceived to get around guidelines or introduce new arms and additional IMPs (of the scale of a new study), likely due to the complexity of setting up several studies.                                                                                                                                                                                                                                                                                                                                                                                                                                                                                                                                                                                                                                            | Strongly Agree<br>(7) | 76.00%                   |
| 45 |           |                                                                                                                                                                                                                                                                                                                                                                                                                                                                                                                                                                                                                                                                                                                                                                                                                                                                                                                                                                                                                                                                                                          |                       |                          |
| 46 |           |                                                                                                                                                                                                                                                                                                                                                                                                                                                                                                                                                                                                                                                                                                                                                                                                                                                                                                                                                                                                                                                                                                          |                       |                          |
| 47 |           |                                                                                                                                                                                                                                                                                                                                                                                                                                                                                                                                                                                                                                                                                                                                                                                                                                                                                                                                                                                                                                                                                                          |                       |                          |
| 48 | 3.3       | Complex trial designs make it difficult to cover the studies of colleagues who are on leave or absent and to maintain a team of skilled staff capable of delivering complex trials who are knowledgeable of patient pathways and treatment regimens. Consistent self-education and motivation is required of cancer research nurses and other research professionals to develop their knowledge to manage the complexities of new processes and treatments, keep ahead of the game, anticipate changes and maintain efficiency.                                                                                                                                                                                                                                                                                                                                                                                                                                                                                                                                                                          | Strongly Agree<br>(7) | 76.00%                   |
| 49 |           |                                                                                                                                                                                                                                                                                                                                                                                                                                                                                                                                                                                                                                                                                                                                                                                                                                                                                                                                                                                                                                                                                                          |                       |                          |
| 50 |           |                                                                                                                                                                                                                                                                                                                                                                                                                                                                                                                                                                                                                                                                                                                                                                                                                                                                                                                                                                                                                                                                                                          |                       |                          |
| 51 |           |                                                                                                                                                                                                                                                                                                                                                                                                                                                                                                                                                                                                                                                                                                                                                                                                                                                                                                                                                                                                                                                                                                          |                       |                          |
| 52 |           |                                                                                                                                                                                                                                                                                                                                                                                                                                                                                                                                                                                                                                                                                                                                                                                                                                                                                                                                                                                                                                                                                                          |                       |                          |
| 53 | 3.31      | The relationship between a Research Nurse and a patient on cancer studies is important and can make a significant difference to the patient joining and remaining on a trial. Cancer patients have complex issues and needs, which increases the input from research staff. Research nurses/officers provide patients with information and support, deal with their questions and problems, arrange additional services (e.g. wheelchairs for appointments), keep track of admissions when a patient lives out of the geographical area of the recruiting site and more. Patient support on cancer studies can mean that research nurses have a CNS role, with patients approaching them first and bypassing their CNS. Complexity affects how research nurses can achieve efficiency in running a trial, within the constraints of their specific hospital or geographical location, whilst causing the least disruption to the patient given all their individual needs, such as the distance that the patients needs to drive and trying to keep visits to a minimum or support these over the phone. | Strongly Agree<br>(7) | 76.00%                   |
| 54 |           |                                                                                                                                                                                                                                                                                                                                                                                                                                                                                                                                                                                                                                                                                                                                                                                                                                                                                                                                                                                                                                                                                                          |                       |                          |
| 55 |           |                                                                                                                                                                                                                                                                                                                                                                                                                                                                                                                                                                                                                                                                                                                                                                                                                                                                                                                                                                                                                                                                                                          |                       |                          |
| 56 |           |                                                                                                                                                                                                                                                                                                                                                                                                                                                                                                                                                                                                                                                                                                                                                                                                                                                                                                                                                                                                                                                                                                          |                       |                          |
| 57 |           |                                                                                                                                                                                                                                                                                                                                                                                                                                                                                                                                                                                                                                                                                                                                                                                                                                                                                                                                                                                                                                                                                                          |                       |                          |
| 58 |           |                                                                                                                                                                                                                                                                                                                                                                                                                                                                                                                                                                                                                                                                                                                                                                                                                                                                                                                                                                                                                                                                                                          |                       |                          |
| 59 |           |                                                                                                                                                                                                                                                                                                                                                                                                                                                                                                                                                                                                                                                                                                                                                                                                                                                                                                                                                                                                                                                                                                          |                       |                          |
| 60 |           |                                                                                                                                                                                                                                                                                                                                                                                                                                                                                                                                                                                                                                                                                                                                                                                                                                                                                                                                                                                                                                                                                                          |                       |                          |

|    |           |                                                                                                                                                                                                                                                                                                                                                                                                                                                                                      |                    |                          |
|----|-----------|--------------------------------------------------------------------------------------------------------------------------------------------------------------------------------------------------------------------------------------------------------------------------------------------------------------------------------------------------------------------------------------------------------------------------------------------------------------------------------------|--------------------|--------------------------|
| 1  | 3.19      | There are complexities in managing logistical issues on studies, such as finding suitable locations for patient review or accessing services and facilities on a large site and where the treatment and laboratory areas are not near the oncology research office.                                                                                                                                                                                                                  | Strongly Agree (7) | 72.00%                   |
| 2  |           |                                                                                                                                                                                                                                                                                                                                                                                                                                                                                      |                    |                          |
| 3  |           |                                                                                                                                                                                                                                                                                                                                                                                                                                                                                      |                    |                          |
| 4  | <b>Q4</b> | <b>Factors Affecting Capacity</b>                                                                                                                                                                                                                                                                                                                                                                                                                                                    | <b>Median</b>      | <b>Consensus % Level</b> |
| 5  |           |                                                                                                                                                                                                                                                                                                                                                                                                                                                                                      |                    |                          |
| 6  | 4.2       | Effective communication is the golden thread, which ensures an organisation can work effectively. The lack of integration, communication and collaboration across hospital sites and departments impacts trial delivery.                                                                                                                                                                                                                                                             | Strongly Agree (7) | 88.00%                   |
| 7  |           |                                                                                                                                                                                                                                                                                                                                                                                                                                                                                      |                    |                          |
| 8  | 4.3       | Inadequate staffing levels make it difficult for teams to meet the demands of current trials and to run as efficiently and effectively as possible.                                                                                                                                                                                                                                                                                                                                  | Strongly Agree (7) | 84.00%                   |
| 9  |           |                                                                                                                                                                                                                                                                                                                                                                                                                                                                                      |                    |                          |
| 10 |           |                                                                                                                                                                                                                                                                                                                                                                                                                                                                                      |                    |                          |
| 11 | 4.45      | Protocols, which are overly complicated, do not realistically work with hospital systems or have been written in such a way that they are hard to interpret impact capacity and efficiency. Studies with well-written protocols that consider the practicalities of trial delivery are much easier for sites to run.                                                                                                                                                                 | Strongly Agree (7) | 84.00%                   |
| 12 |           |                                                                                                                                                                                                                                                                                                                                                                                                                                                                                      |                    |                          |
| 13 |           |                                                                                                                                                                                                                                                                                                                                                                                                                                                                                      |                    |                          |
| 14 |           |                                                                                                                                                                                                                                                                                                                                                                                                                                                                                      |                    |                          |
| 15 | 4.46      | The increasing complexity of new cancer trials and protocols can be challenging for sites to deliver and therefore detailed feasibility is essential, but the implications of running the study is not always apparent at the outset as frequent or unnecessary amendments can impact the capacity of the team as the study progresses.                                                                                                                                              | Strongly Agree (7) | 84.00%                   |
| 16 |           |                                                                                                                                                                                                                                                                                                                                                                                                                                                                                      |                    |                          |
| 17 |           |                                                                                                                                                                                                                                                                                                                                                                                                                                                                                      |                    |                          |
| 18 |           |                                                                                                                                                                                                                                                                                                                                                                                                                                                                                      |                    |                          |
| 19 | 4.8       | Allied professional services and support departments such as radiology and pathology are crucial to the running of cancer clinical trials. It is essential that their involvement in trials is adequately rewarded financially and that professionals and teams are motivated by recognition of their scientific or academic contribution to research in trial publications.                                                                                                         | Strongly Agree (7) | 84.00%                   |
| 20 |           |                                                                                                                                                                                                                                                                                                                                                                                                                                                                                      |                    |                          |
| 21 |           |                                                                                                                                                                                                                                                                                                                                                                                                                                                                                      |                    |                          |
| 22 |           |                                                                                                                                                                                                                                                                                                                                                                                                                                                                                      |                    |                          |
| 23 | 4.6       | Research support staff and data managers are essential to effective trial management and in supporting clinical teams through trial administration, laboratory work, quality assessments and data management, all of which are crucial in answering the clinical trial hypothesis. Ensuring there is continued funding in place to maintain their jobs is time consuming and challenging. Capacity is affected by the lack of data management and administrative resource available. | Strongly Agree (7) | 80.00%                   |
| 24 |           |                                                                                                                                                                                                                                                                                                                                                                                                                                                                                      |                    |                          |
| 25 |           |                                                                                                                                                                                                                                                                                                                                                                                                                                                                                      |                    |                          |
| 26 |           |                                                                                                                                                                                                                                                                                                                                                                                                                                                                                      |                    |                          |
| 27 | 4.7       | Workforce limitations of support departments involved in trial delivery e.g. radiology, pathology, cardiology etc. affects research capacity with some departments limited by resource and their ability to accommodate additional trial work in a timely manner.                                                                                                                                                                                                                    | Strongly Agree (7) | 80.00%                   |
| 28 |           |                                                                                                                                                                                                                                                                                                                                                                                                                                                                                      |                    |                          |
| 29 |           |                                                                                                                                                                                                                                                                                                                                                                                                                                                                                      |                    |                          |
| 30 | 4.1       | NHS staffing constraints and reduced funding from the NIHR creates additional work for sites in trying to secure funding from different sources to support staffing or having to spread the attached workload from the reduced posts to existing staff.                                                                                                                                                                                                                              | Strongly Agree (7) | 76.00%                   |
| 31 |           |                                                                                                                                                                                                                                                                                                                                                                                                                                                                                      |                    |                          |
| 32 |           |                                                                                                                                                                                                                                                                                                                                                                                                                                                                                      |                    |                          |
| 33 | <b>Q5</b> | <b>Top Strategic Priorities</b>                                                                                                                                                                                                                                                                                                                                                                                                                                                      | <b>Median</b>      | <b>Consensus % Level</b> |
| 34 |           |                                                                                                                                                                                                                                                                                                                                                                                                                                                                                      |                    |                          |
| 35 | 5.13      | Decision makers at national and local levels require a greater level of understanding of the constraints, resource and capacity issues and the priorities for research delivery and funding in the NHS.                                                                                                                                                                                                                                                                              | Strongly Agree (7) | 88.00%                   |
| 36 |           |                                                                                                                                                                                                                                                                                                                                                                                                                                                                                      |                    |                          |
| 37 |           |                                                                                                                                                                                                                                                                                                                                                                                                                                                                                      |                    |                          |
| 38 | 5.2       | Development of biomarkers for predicting suitability and response to treatment and early diagnosis techniques.                                                                                                                                                                                                                                                                                                                                                                       | Strongly Agree (7) | 88.00%                   |
| 39 |           |                                                                                                                                                                                                                                                                                                                                                                                                                                                                                      |                    |                          |
| 40 |           |                                                                                                                                                                                                                                                                                                                                                                                                                                                                                      |                    |                          |
| 41 | 5.20      | Promote cultural change and education to raise the profile of research and highlight the importance of clinical trials in the provision of cancer care within the NHS.                                                                                                                                                                                                                                                                                                               | Strongly Agree (7) | 88.00%                   |
| 42 |           |                                                                                                                                                                                                                                                                                                                                                                                                                                                                                      |                    |                          |
| 43 |           |                                                                                                                                                                                                                                                                                                                                                                                                                                                                                      |                    |                          |
| 44 | 5.22      | Ensure development of strong working relationships and rapport between research teams and supporting departments.                                                                                                                                                                                                                                                                                                                                                                    | Strongly Agree (7) | 88.00%                   |
| 45 |           |                                                                                                                                                                                                                                                                                                                                                                                                                                                                                      |                    |                          |
| 46 | 5.6       | Improve collaboration and communication between Trusts and organisations (including non-NHS care providers such as hospices) to ensure patient care and choice is prioritised and all are given the opportunity to participate in research, where desired and appropriate.                                                                                                                                                                                                           | Strongly Agree (7) | 88.00%                   |
| 47 |           |                                                                                                                                                                                                                                                                                                                                                                                                                                                                                      |                    |                          |
| 48 |           |                                                                                                                                                                                                                                                                                                                                                                                                                                                                                      |                    |                          |
| 49 | 5.12      | The structure, activity and provision for research across the UK is variable and inconsistent. CRN funding needs to be reviewed to develop a clear equitable banding structure, which is measured and fairly reflects research activity.                                                                                                                                                                                                                                             | Strongly Agree (7) | 84.00%                   |
| 50 |           |                                                                                                                                                                                                                                                                                                                                                                                                                                                                                      |                    |                          |
| 51 |           |                                                                                                                                                                                                                                                                                                                                                                                                                                                                                      |                    |                          |
| 52 | 5.19      | Facilitate a detailed multi-disciplinary feasibility process to include all relevant staff and services ensuring all parties have capacity and capability to deliver all elements of the trial from the outset and can provide continued and consistent care during the treatment and follow-up stages.                                                                                                                                                                              | Strongly Agree (7) | 84.00%                   |
| 53 |           |                                                                                                                                                                                                                                                                                                                                                                                                                                                                                      |                    |                          |
| 54 |           |                                                                                                                                                                                                                                                                                                                                                                                                                                                                                      |                    |                          |
| 55 | 5.28      | Provide research specific induction training for registrars and consultants rotating hospitals to raise awareness of current trials and clinical research activities.                                                                                                                                                                                                                                                                                                                | Strongly Agree (7) | 84.00%                   |
| 56 |           |                                                                                                                                                                                                                                                                                                                                                                                                                                                                                      |                    |                          |
| 57 |           |                                                                                                                                                                                                                                                                                                                                                                                                                                                                                      |                    |                          |
| 58 | 5.3       | Investment in technology and the development of a national centralised database to enable access to trial information for researchers and patients with the ability to search by tumour site, patient factors and study eligibility in real time to expand trial opportunities to more patient groups.                                                                                                                                                                               | Strongly Agree (7) | 84.00%                   |
| 59 |           |                                                                                                                                                                                                                                                                                                                                                                                                                                                                                      |                    |                          |
| 60 | 5.31      | Increase the use and uptake of IT systems, software and computer tablets for data capture and storage (e.g. eCRFs and electronic site files), support paper-light research and reduce or remove paper based data forms.                                                                                                                                                                                                                                                              | Strongly Agree (7) | 84.00%                   |

|    |           |                                                                                                                                                                                                                                                                                                                                                                                                                     |                    |                          |
|----|-----------|---------------------------------------------------------------------------------------------------------------------------------------------------------------------------------------------------------------------------------------------------------------------------------------------------------------------------------------------------------------------------------------------------------------------|--------------------|--------------------------|
| 1  | 5.4       | Increase accessibility, choice and participation in clinical trials to make a difference for patients in the NHS and to advance medicine, care, survival and access to the best evidence based treatments options.                                                                                                                                                                                                  | Strongly Agree (7) | 84.00%                   |
| 2  | 5.7       | Cancer research should be recognised as a speciality area with a core funding model developed to reflect the service and support requirements of research sites and meet the needs of patients within this complex field.                                                                                                                                                                                           | Strongly Agree (7) | 84.00%                   |
| 3  | 5.9       | Improve data sharing between departments, hospitals and NHS care providers to facilitate accurate and timely data collection.                                                                                                                                                                                                                                                                                       | Strongly Agree (7) | 84.00%                   |
| 4  | 5.11      | Increase external network funding for permanent, highly trained clinical trials staff in all NHS cancer centres and hospitals conducting cancer clinical research.                                                                                                                                                                                                                                                  | Strongly Agree (7) | 80.00%                   |
| 5  | 5.14      | The current NIHR targets are unrealistic and frequently unachievable. More realistic objectives and targets should be developed to ensure patient safety, data integrity and trials can be practically delivered relative to the disease and protocol complexity.                                                                                                                                                   | Strongly Agree (7) | 80.00%                   |
| 6  | 5.15      | A national costing review across the NHS organisation is required to price research effectively and agree standard costing templates ensuring Trusts accurately invoice for research activities and services provided.                                                                                                                                                                                              | Strongly Agree (7) | 80.00%                   |
| 7  | 5.24      | Ensure MHRA inspections are conducted in a professional, collaborative and pragmatic manner working with R&D teams to limit onerous paperwork or the burden of overly bureaucratic procedures.                                                                                                                                                                                                                      | Strongly Agree (7) | 80.00%                   |
| 8  | 5.30      | Prioritisation and implementation of a funding model recognising the workload and resource involvement in the provision of patient follow-up and quality data management.                                                                                                                                                                                                                                           | Strongly Agree (7) | 80.00%                   |
| 9  | 5.1       | Development of more targeted treatments to be able to offer trials to patients in all cancer areas and provide a balanced portfolio in each tumour group supported at local, regional and national levels.                                                                                                                                                                                                          | Strongly Agree (7) | 76.00%                   |
| 10 | 5.16      | Research sites need a way of assessing complexity to allocate resource, which is accurate, validated and future proofed.                                                                                                                                                                                                                                                                                            | Strongly Agree (7) | 76.00%                   |
| 11 | 5.18      | Raise awareness of the importance of the continued support of Principal Investigators and Co-Investigators throughout a research study and ensure that they maintain oversight, active involvement and responsibility.                                                                                                                                                                                              | Strongly Agree (7) | 76.00%                   |
| 12 | 5.23      | Develop strong and collaborative working relationships between site and sponsor staff.                                                                                                                                                                                                                                                                                                                              | Strongly Agree (7) | 76.00%                   |
| 13 | 5.32      | Invest in staff training and development to include cancer specific modules so that research professionals are confident in discussing the disease and trial processes to patients.                                                                                                                                                                                                                                 | Strongly Agree (7) | 76.00%                   |
| 14 | <b>Q6</b> | <b>Effective Research Practice</b>                                                                                                                                                                                                                                                                                                                                                                                  | <b>Median</b>      | <b>Consensus % Level</b> |
| 15 | 6.17      | Good communication skills and effective patient relationships help participants understand the trials and what participation will mean for them.                                                                                                                                                                                                                                                                    | Strongly Agree (7) | 88.00%                   |
| 16 | 6.2       | Well run, established departments and research teams who receive regular training, are efficient, proactive, flexible to change and demonstrate a wealth of knowledge and excellence in clinical trial delivery.                                                                                                                                                                                                    | Strongly Agree (7) | 84.00%                   |
| 17 | 6.14      | Principal Investigators who proactively support and engage with the research team, are available to provide advice when required, maintain oversight on their trials, including follow-up visits and discussion of treatment plans, ensure that trials are run effectively and safely in their research area.                                                                                                       | Strongly Agree (7) | 80.00%                   |
| 18 | 6.18      | Effective practice is demonstrated by dedicated staff who are willing to go above and beyond to recruit and support patients in clinical trials. Caring and skilled research professionals who treat patients as individuals and not just as a recruitment figure are appreciated by patients who value their support, and continue on the trial for follow-up visits and are less likely to withdraw from studies. | Strongly Agree (7) | 80.00%                   |
| 19 | 6.21      | The provision of dedicated teams and specialists for specific cancer disease areas/sites within trial units enhances research delivery and staff knowledge in their speciality, in contrast to stretching resources across multiple specialisms.                                                                                                                                                                    | Strongly Agree (7) | 80.00%                   |
| 20 | 6.24      | The dedication, passion and skill of research staff and putting the patient's best interest first greatly contributes to the effective running of trials in the NHS, despite being understaffed, and strong collaborative teamwork supports staff retention under very tight circumstances.                                                                                                                         | Strongly Agree (7) | 80.00%                   |
| 21 | 6.25      | Excellent communication and collaboration between supporting departments, clinics, staff roles and specialisms is demonstrated in effective research practice and will support efficient trial delivery.                                                                                                                                                                                                            | Strongly Agree (7) | 80.00%                   |

|    |           |                                                                                                                                                                                                                                                                                                                                            |                    |                          |
|----|-----------|--------------------------------------------------------------------------------------------------------------------------------------------------------------------------------------------------------------------------------------------------------------------------------------------------------------------------------------------|--------------------|--------------------------|
| 1  | 6.23      | Positive attitudes, open communication and respect across professions and roles, clear direction and guidance, sharing of best practices and the raising of concerns will support comprehension between all areas and parties involved in clinical research within the NHS and is essential to support future effective research delivery. | Strongly Agree (7) | 76.00%                   |
| 2  |           |                                                                                                                                                                                                                                                                                                                                            |                    |                          |
| 3  |           |                                                                                                                                                                                                                                                                                                                                            |                    |                          |
| 4  | 6.7       | Patients are very positive about trial participation and really enjoy acknowledgement of their involvement. Feedback, communication, newsletters or publications through the media or from trial units demonstrates good practice.                                                                                                         | Strongly Agree (7) | 76.00%                   |
| 5  |           |                                                                                                                                                                                                                                                                                                                                            |                    |                          |
| 6  |           |                                                                                                                                                                                                                                                                                                                                            |                    |                          |
| 7  | <b>Q7</b> | <b>Additional Delphi Considerations</b>                                                                                                                                                                                                                                                                                                    | <b>Median</b>      | <b>Consensus % Level</b> |
| 8  |           |                                                                                                                                                                                                                                                                                                                                            |                    |                          |
| 9  | 7.3       | Supporting the primary end points of clinical trials should be the main goal of the NIHR and follow-up should be appropriately funded to achieve this.                                                                                                                                                                                     | Strongly Agree (7) | 72.00%                   |
| 10 |           |                                                                                                                                                                                                                                                                                                                                            |                    |                          |
| 11 |           |                                                                                                                                                                                                                                                                                                                                            |                    |                          |
| 12 |           |                                                                                                                                                                                                                                                                                                                                            |                    |                          |
| 13 |           |                                                                                                                                                                                                                                                                                                                                            |                    |                          |
| 14 |           |                                                                                                                                                                                                                                                                                                                                            |                    |                          |
| 15 |           |                                                                                                                                                                                                                                                                                                                                            |                    |                          |
| 16 |           |                                                                                                                                                                                                                                                                                                                                            |                    |                          |
| 17 |           |                                                                                                                                                                                                                                                                                                                                            |                    |                          |
| 18 |           |                                                                                                                                                                                                                                                                                                                                            |                    |                          |
| 19 |           |                                                                                                                                                                                                                                                                                                                                            |                    |                          |
| 20 |           |                                                                                                                                                                                                                                                                                                                                            |                    |                          |
| 21 |           |                                                                                                                                                                                                                                                                                                                                            |                    |                          |
| 22 |           |                                                                                                                                                                                                                                                                                                                                            |                    |                          |
| 23 |           |                                                                                                                                                                                                                                                                                                                                            |                    |                          |
| 24 |           |                                                                                                                                                                                                                                                                                                                                            |                    |                          |
| 25 |           |                                                                                                                                                                                                                                                                                                                                            |                    |                          |
| 26 |           |                                                                                                                                                                                                                                                                                                                                            |                    |                          |
| 27 |           |                                                                                                                                                                                                                                                                                                                                            |                    |                          |
| 28 |           |                                                                                                                                                                                                                                                                                                                                            |                    |                          |
| 29 |           |                                                                                                                                                                                                                                                                                                                                            |                    |                          |
| 30 |           |                                                                                                                                                                                                                                                                                                                                            |                    |                          |
| 31 |           |                                                                                                                                                                                                                                                                                                                                            |                    |                          |
| 32 |           |                                                                                                                                                                                                                                                                                                                                            |                    |                          |
| 33 |           |                                                                                                                                                                                                                                                                                                                                            |                    |                          |
| 34 |           |                                                                                                                                                                                                                                                                                                                                            |                    |                          |
| 35 |           |                                                                                                                                                                                                                                                                                                                                            |                    |                          |
| 36 |           |                                                                                                                                                                                                                                                                                                                                            |                    |                          |
| 37 |           |                                                                                                                                                                                                                                                                                                                                            |                    |                          |
| 38 |           |                                                                                                                                                                                                                                                                                                                                            |                    |                          |
| 39 |           |                                                                                                                                                                                                                                                                                                                                            |                    |                          |
| 40 |           |                                                                                                                                                                                                                                                                                                                                            |                    |                          |
| 41 |           |                                                                                                                                                                                                                                                                                                                                            |                    |                          |
| 42 |           |                                                                                                                                                                                                                                                                                                                                            |                    |                          |
| 43 |           |                                                                                                                                                                                                                                                                                                                                            |                    |                          |
| 44 |           |                                                                                                                                                                                                                                                                                                                                            |                    |                          |
| 45 |           |                                                                                                                                                                                                                                                                                                                                            |                    |                          |
| 46 |           |                                                                                                                                                                                                                                                                                                                                            |                    |                          |
| 47 |           |                                                                                                                                                                                                                                                                                                                                            |                    |                          |
| 48 |           |                                                                                                                                                                                                                                                                                                                                            |                    |                          |
| 49 |           |                                                                                                                                                                                                                                                                                                                                            |                    |                          |
| 50 |           |                                                                                                                                                                                                                                                                                                                                            |                    |                          |
| 51 |           |                                                                                                                                                                                                                                                                                                                                            |                    |                          |
| 52 |           |                                                                                                                                                                                                                                                                                                                                            |                    |                          |
| 53 |           |                                                                                                                                                                                                                                                                                                                                            |                    |                          |
| 54 |           |                                                                                                                                                                                                                                                                                                                                            |                    |                          |
| 55 |           |                                                                                                                                                                                                                                                                                                                                            |                    |                          |
| 56 |           |                                                                                                                                                                                                                                                                                                                                            |                    |                          |
| 57 |           |                                                                                                                                                                                                                                                                                                                                            |                    |                          |
| 58 |           |                                                                                                                                                                                                                                                                                                                                            |                    |                          |
| 59 |           |                                                                                                                                                                                                                                                                                                                                            |                    |                          |
| 60 |           |                                                                                                                                                                                                                                                                                                                                            |                    |                          |

For peer review only

## Research and reporting methodology

Revised **Standards for Quality Improvement Reporting Excellence (SQIRE 2.0)** publication guidelines.

### Notes to authors

- ▶ The SQIRE guidelines provide a framework for reporting new knowledge about how to improve healthcare.
- ▶ The SQIRE guidelines are intended for reports that describe system level work to improve the quality, safety and value of healthcare, and used methods to establish that observed outcomes were due to the intervention(s).
- ▶ A range of approaches exists for improving healthcare. SQIRE may be adapted for reporting any of these.
- ▶ Authors should consider every SQIRE item, but it may be inappropriate or unnecessary to include every SQIRE element in a particular manuscript.
- ▶ The SQIRE glossary contains definitions of many of the key words in SQIRE.
- ▶ The explanation and elaboration document provides specific examples of well-written SQIRE items and an in-depth explanation of each item.
- ▶ Please cite SQIRE when it is used to write a manuscript.

| Text section and item name                                                                                                                                                                                                                           | Page/line no(s).<br>info is located                                                                                                                                           |
|------------------------------------------------------------------------------------------------------------------------------------------------------------------------------------------------------------------------------------------------------|-------------------------------------------------------------------------------------------------------------------------------------------------------------------------------|
| <b>Title and abstract</b>                                                                                                                                                                                                                            |                                                                                                                                                                               |
| <b>1. Title</b>                                                                                                                                                                                                                                      |                                                                                                                                                                               |
| Indicate that the manuscript concerns an initiative to improve healthcare (broadly defined to include the quality, safety, effectiveness, patient-centredness, timeliness, cost, efficiency and equity of healthcare).                               | Page 2. Title includes 'evaluation' implies review of effectiveness for improvement and 'perspectives' which implies 'equity' in using experts in evaluation for improvement. |
| <b>2. Abstract</b>                                                                                                                                                                                                                                   |                                                                                                                                                                               |
| a. Provide adequate information to aid in searching and indexing.                                                                                                                                                                                    | Page 2, Keywords                                                                                                                                                              |
| b. Summarise all key information from various sections of the text using the abstract format of the intended publication or a structured summary such as: background, local problem, methods, interventions, results, conclusions.                   | Page 2                                                                                                                                                                        |
| <b>Introduction: Why did you start?</b>                                                                                                                                                                                                              |                                                                                                                                                                               |
| <b>3. Problem description</b> - Nature and significance of the local problem.                                                                                                                                                                        | Page 2                                                                                                                                                                        |
| <b>4. Available knowledge</b> - Summary of what is currently known about the problem, including relevant previous studies.                                                                                                                           | Page 3                                                                                                                                                                        |
| <b>5. Rationale</b> - Informal or formal frameworks, models, concepts and/or theories used to explain the problem, any reasons or assumptions that were used to develop the intervention(s) and reasons why the intervention(s) was expected to work | Page 3                                                                                                                                                                        |
| <b>6. Specific aims</b> - Purpose of the project and of this report.                                                                                                                                                                                 | Page 3                                                                                                                                                                        |
| <b>Methods: What did you do?</b>                                                                                                                                                                                                                     |                                                                                                                                                                               |
| <b>7. Context</b> - Contextual elements considered important at the outset of introducing the intervention(s).                                                                                                                                       | Page 3                                                                                                                                                                        |



|    |                                                                                                                                                                                                                              |                                                                                                                                                                       |
|----|------------------------------------------------------------------------------------------------------------------------------------------------------------------------------------------------------------------------------|-----------------------------------------------------------------------------------------------------------------------------------------------------------------------|
| 1  | <b>8. Intervention(s)</b>                                                                                                                                                                                                    |                                                                                                                                                                       |
| 2  |                                                                                                                                                                                                                              |                                                                                                                                                                       |
| 3  | a. Description of the intervention(s) in sufficient detail that others could reproduce it.                                                                                                                                   | Pages 3-4                                                                                                                                                             |
| 4  | b. Specifics of the team involved in the work.                                                                                                                                                                               | Pages 3-4                                                                                                                                                             |
| 5  | <b>9. Study of the intervention(s)</b>                                                                                                                                                                                       |                                                                                                                                                                       |
| 6  |                                                                                                                                                                                                                              |                                                                                                                                                                       |
| 7  | a. Approach chosen for assessing the impact of the intervention(s).                                                                                                                                                          | Pages 3-5                                                                                                                                                             |
| 8  | b. Approach used to establish whether the observed outcomes were due to the intervention(s).                                                                                                                                 | Pages 3-5                                                                                                                                                             |
| 9  |                                                                                                                                                                                                                              |                                                                                                                                                                       |
| 10 | <b>10. Measures</b>                                                                                                                                                                                                          |                                                                                                                                                                       |
| 11 |                                                                                                                                                                                                                              |                                                                                                                                                                       |
| 12 | a. Measures chosen for studying processes and outcomes of the intervention(s), including rationale for choosing them, their operational definitions and their validity and reliability.                                      | Pages 3-5                                                                                                                                                             |
| 13 |                                                                                                                                                                                                                              |                                                                                                                                                                       |
| 14 |                                                                                                                                                                                                                              | This outcomes of the study are developing a tool for ongoing evaluation of research delivery and efficiency. The actual Delphi method used is described in pages 3-5. |
| 15 |                                                                                                                                                                                                                              |                                                                                                                                                                       |
| 16 |                                                                                                                                                                                                                              |                                                                                                                                                                       |
| 17 |                                                                                                                                                                                                                              |                                                                                                                                                                       |
| 18 |                                                                                                                                                                                                                              |                                                                                                                                                                       |
| 19 |                                                                                                                                                                                                                              |                                                                                                                                                                       |
| 20 |                                                                                                                                                                                                                              |                                                                                                                                                                       |
| 21 |                                                                                                                                                                                                                              |                                                                                                                                                                       |
| 22 |                                                                                                                                                                                                                              |                                                                                                                                                                       |
| 23 |                                                                                                                                                                                                                              |                                                                                                                                                                       |
| 24 |                                                                                                                                                                                                                              |                                                                                                                                                                       |
| 25 | b. Description of the approach to the ongoing assessment of contextual elements that contributed to the success, failure, efficiency and cost.                                                                               |                                                                                                                                                                       |
| 26 |                                                                                                                                                                                                                              |                                                                                                                                                                       |
| 27 | c. Methods employed for assessing completeness and accuracy of data.                                                                                                                                                         | Pages 4-5                                                                                                                                                             |
| 28 |                                                                                                                                                                                                                              |                                                                                                                                                                       |
| 29 | <b>11. Analysis</b>                                                                                                                                                                                                          |                                                                                                                                                                       |
| 30 |                                                                                                                                                                                                                              |                                                                                                                                                                       |
| 31 | a. Qualitative and quantitative methods used to draw inferences from the data.                                                                                                                                               | Page 5                                                                                                                                                                |
| 32 | b. Methods for understanding variation within the data, including the effects of time as a variable.                                                                                                                         | Page 5                                                                                                                                                                |
| 33 |                                                                                                                                                                                                                              |                                                                                                                                                                       |
| 34 | <b>12. Ethical considerations</b> - Ethical aspects of implementing and studying the intervention(s) and how they were addressed, including, but not limited to, formal ethics review and potential conflict(s) of interest. | Pages 3-5                                                                                                                                                             |
| 35 |                                                                                                                                                                                                                              |                                                                                                                                                                       |
| 36 |                                                                                                                                                                                                                              |                                                                                                                                                                       |
| 37 |                                                                                                                                                                                                                              |                                                                                                                                                                       |
| 38 |                                                                                                                                                                                                                              |                                                                                                                                                                       |
| 39 | <b>Results: What did you find?</b>                                                                                                                                                                                           |                                                                                                                                                                       |
| 40 | <b>13. Results</b>                                                                                                                                                                                                           |                                                                                                                                                                       |
| 41 |                                                                                                                                                                                                                              |                                                                                                                                                                       |
| 42 | a. Initial steps of the intervention(s) and their evolution over time (eg, time-line diagram, flow chart or table), including modifications made to the intervention during the project.                                     | Pages 5-6 & 9                                                                                                                                                         |
| 43 | b. Details of the process measures and outcomes.                                                                                                                                                                             | Pages 6-9                                                                                                                                                             |
| 44 | c. Contextual elements that interacted with the intervention(s).                                                                                                                                                             | Page 6                                                                                                                                                                |
| 45 | d. Observed associations between outcomes, interventions and relevant contextual elements.                                                                                                                                   | Page 6                                                                                                                                                                |
| 46 | e. Unintended consequences such as unexpected benefits, problems, failures or costs associated with the intervention(s).                                                                                                     | Page 6                                                                                                                                                                |
| 47 |                                                                                                                                                                                                                              |                                                                                                                                                                       |
| 48 |                                                                                                                                                                                                                              |                                                                                                                                                                       |
| 49 |                                                                                                                                                                                                                              |                                                                                                                                                                       |
| 50 | f. Details about missing data.                                                                                                                                                                                               | Page 6 - see table 2 note                                                                                                                                             |
| 51 |                                                                                                                                                                                                                              |                                                                                                                                                                       |
| 52 |                                                                                                                                                                                                                              |                                                                                                                                                                       |
| 53 |                                                                                                                                                                                                                              |                                                                                                                                                                       |
| 54 |                                                                                                                                                                                                                              |                                                                                                                                                                       |
| 55 | <b>Discussion: What does it mean?</b>                                                                                                                                                                                        |                                                                                                                                                                       |
| 56 | <b>14. Summary</b>                                                                                                                                                                                                           |                                                                                                                                                                       |
| 57 |                                                                                                                                                                                                                              |                                                                                                                                                                       |
| 58 | a. Key findings, including relevance to the rationale and specific aims.                                                                                                                                                     | Pages 9-12                                                                                                                                                            |
| 59 | b. Particular strengths of the project.                                                                                                                                                                                      | Page 12                                                                                                                                                               |

|    |                                                                                                                                                                          |                                                                                         |
|----|--------------------------------------------------------------------------------------------------------------------------------------------------------------------------|-----------------------------------------------------------------------------------------|
| 1  |                                                                                                                                                                          |                                                                                         |
| 2  | <b>15. Interpretation</b>                                                                                                                                                |                                                                                         |
| 3  | a. Nature of the association between the intervention(s) and the outcomes.                                                                                               | Pages 12-13                                                                             |
| 4  | b. Comparison of results with findings from other publications.                                                                                                          | Pages 11-12                                                                             |
| 5  | c. Impact of the project on people and systems.                                                                                                                          | Pages 12-13                                                                             |
| 6  | d. Reasons for any differences between observed and anticipated outcomes, including the influence of context.                                                            | Pages 12-13                                                                             |
| 7  |                                                                                                                                                                          | Ongoing research to fully evaluate- see discussion on purpose of TRACAT and pages 11-13 |
| 8  |                                                                                                                                                                          |                                                                                         |
| 9  |                                                                                                                                                                          |                                                                                         |
| 10 |                                                                                                                                                                          |                                                                                         |
| 11 |                                                                                                                                                                          |                                                                                         |
| 12 |                                                                                                                                                                          |                                                                                         |
| 13 |                                                                                                                                                                          |                                                                                         |
| 14 |                                                                                                                                                                          |                                                                                         |
| 15 |                                                                                                                                                                          |                                                                                         |
| 16 | e. Costs and strategic trade-offs, including opportunity costs.                                                                                                          | Pages 12-13                                                                             |
| 17 |                                                                                                                                                                          |                                                                                         |
| 18 | <b>16. Limitations</b>                                                                                                                                                   |                                                                                         |
| 19 |                                                                                                                                                                          |                                                                                         |
| 20 | a. Limits to the generalisability of the work.                                                                                                                           | Page 12                                                                                 |
| 21 | b. Factors that might have limited internal validity such as confounding, bias or imprecision in the design, methods, measurement or analysis.                           | Page 12                                                                                 |
| 22 |                                                                                                                                                                          |                                                                                         |
| 23 | c. Efforts made to minimise and adjust for limitations.                                                                                                                  | Pages 12-13                                                                             |
| 24 |                                                                                                                                                                          |                                                                                         |
| 25 |                                                                                                                                                                          |                                                                                         |
| 26 | <b>Conclusions</b>                                                                                                                                                       |                                                                                         |
| 27 |                                                                                                                                                                          |                                                                                         |
| 28 | a. Usefulness of the work.                                                                                                                                               | Pages 11-13                                                                             |
| 29 | b. Sustainability.                                                                                                                                                       | Pages 11-13                                                                             |
| 30 | c. Potential for spread to other contexts.                                                                                                                               | Pages 11-13                                                                             |
| 31 | d. Implications for practice and for further study in the field.                                                                                                         | Pages 11-13                                                                             |
| 32 | e. Suggested next steps.                                                                                                                                                 | Pages 12-13                                                                             |
| 33 |                                                                                                                                                                          |                                                                                         |
| 34 |                                                                                                                                                                          |                                                                                         |
| 35 | <b>Other information</b>                                                                                                                                                 |                                                                                         |
| 36 |                                                                                                                                                                          |                                                                                         |
| 37 | <b>18. Funding</b> - Sources of funding that supported this work. Role, if any, of the funding organisation in the design, implementation, interpretation and reporting. | Page 13                                                                                 |
| 38 |                                                                                                                                                                          |                                                                                         |
| 39 |                                                                                                                                                                          |                                                                                         |
| 40 |                                                                                                                                                                          |                                                                                         |
| 41 |                                                                                                                                                                          |                                                                                         |
| 42 |                                                                                                                                                                          |                                                                                         |
| 43 |                                                                                                                                                                          |                                                                                         |
| 44 |                                                                                                                                                                          |                                                                                         |
| 45 |                                                                                                                                                                          |                                                                                         |
| 46 |                                                                                                                                                                          |                                                                                         |
| 47 |                                                                                                                                                                          |                                                                                         |
| 48 |                                                                                                                                                                          |                                                                                         |
| 49 |                                                                                                                                                                          |                                                                                         |
| 50 |                                                                                                                                                                          |                                                                                         |
| 51 |                                                                                                                                                                          |                                                                                         |
| 52 |                                                                                                                                                                          |                                                                                         |
| 53 |                                                                                                                                                                          |                                                                                         |
| 54 |                                                                                                                                                                          |                                                                                         |
| 55 |                                                                                                                                                                          |                                                                                         |
| 56 |                                                                                                                                                                          |                                                                                         |
| 57 |                                                                                                                                                                          |                                                                                         |
| 58 |                                                                                                                                                                          |                                                                                         |
| 59 |                                                                                                                                                                          |                                                                                         |
| 60 |                                                                                                                                                                          |                                                                                         |

Ogrinc G, et al. *BMJ Qual Saf* 2015;0:1–7. doi:10.1136/bmjqs-2015-004411

Downloaded from <http://qualitysafety.bmj.com/> on January 2, 2017
